# Supplementary material for: An Improved Genotyping by Sequencing (GBS) Approach Offering Increased Versatility and Efficiency of SNP Discovery and Genotyping
Source: PLoS One. 2013 Jan 23;8(1):e54603. doi: 10.1371/journal.pone.0054603 (PMC3553054; doi:10.1371/journal.pone.0054603)
Supplement: Table S1 — Functional annotation of SNPs. Annotation was performed using snpEff v.3 for a collection of SNPS obtained by Illumina sequencing of a GBS library prepared from eight soybean genotypes. (XLSX) [file pone.0054603.s003.xlsx]

## Sheet: Sheet1
Table S1. Functional annotation of SNPs . Annotation was performed using snpEff v.3 for a collection of SNPS obtained by Illumina sequencing of a GBS library prepared from eight soybean genotypes.
#CHROM	POS	REF	ALT	INFO
Gm01	156795	G	A	EFF=INTERGENIC(MODIFIER||||||||)
Gm01	160497	G	A	EFF=INTERGENIC(MODIFIER||||||||)
Gm01	160527	G	A	EFF=INTERGENIC(MODIFIER||||||||)
Gm01	160869	T	A	EFF=INTERGENIC(MODIFIER||||||||)
Gm01	230614	G	A	EFF=SYNONYMOUS_CODING(LOW|SILENT|ttC/ttT|F621|Glyma01g00430|mRNA||PAC:16242909|PAC:16242909.exon.16),SYNONYMOUS_CODING(LOW|SILENT|ttC/ttT|F632|Glyma01g00430|mRNA||PAC:16242908|PAC:16242908.exon.16),UPSTREAM(MODIFIER||||Glyma01g00420|mRNA||PAC:16242907|)
Gm01	284285	T	C	EFF=SYNONYMOUS_CODING(LOW|SILENT|tgT/tgC|C501|Glyma01g00490|mRNA||PAC:16242915|PAC:16242915.exon.8),UPSTREAM(MODIFIER||||Glyma01g00500|mRNA||PAC:16242916|)
Gm01	293821	A	G	EFF=INTRON(MODIFIER||||Glyma01g00510|mRNA||PAC:16242917|)
Gm01	293822	C	T	EFF=INTRON(MODIFIER||||Glyma01g00510|mRNA||PAC:16242917|)
Gm01	294062	G	A	EFF=NON_SYNONYMOUS_CODING(MODERATE|MISSENSE|aCg/aTg|T640M|Glyma01g00510|mRNA||PAC:16242917|PAC:16242917.exon.11)
Gm01	294645	A	G	EFF=INTRON(MODIFIER||||Glyma01g00510|mRNA||PAC:16242917|)
Gm01	386268	G	T	EFF=DOWNSTREAM(MODIFIER||||Glyma01g00640|mRNA||PAC:16242931|),DOWNSTREAM(MODIFIER||||Glyma01g00670|mRNA||PAC:16242934|),INTRAGENIC(MODIFIER||||Glyma01g00660|mRNA|||)
Gm01	394000	C	T	EFF=DOWNSTREAM(MODIFIER||||Glyma01g00690|mRNA||PAC:16242936|),DOWNSTREAM(MODIFIER||||Glyma01g00690|mRNA||PAC:16242937|),INTRON(MODIFIER||||Glyma01g00680|mRNA||PAC:16242935|),UPSTREAM(MODIFIER||||Glyma01g00670|mRNA||PAC:16242934|)
Gm01	398964	C	T	EFF=DOWNSTREAM(MODIFIER||||Glyma01g00680|mRNA||PAC:16242935|),INTRON(MODIFIER||||Glyma01g00690|mRNA||PAC:16242936|),INTRON(MODIFIER||||Glyma01g00690|mRNA||PAC:16242937|)
Gm01	455330	G	C	EFF=DOWNSTREAM(MODIFIER||||Glyma01g00790|mRNA||PAC:16242952|),DOWNSTREAM(MODIFIER||||Glyma01g00810|mRNA||PAC:16242954|),INTRAGENIC(MODIFIER||||Glyma01g00800|mRNA|||)
Gm01	470125	C	A	EFF=UPSTREAM(MODIFIER||||Glyma01g00820|mRNA||PAC:16242955|)
Gm01	528379	T	C	EFF=INTRON(MODIFIER||||Glyma01g00870|mRNA||PAC:16242965|),UPSTREAM(MODIFIER||||Glyma01g00870|mRNA||PAC:16242966|)
Gm01	528387	T	C	EFF=INTRON(MODIFIER||||Glyma01g00870|mRNA||PAC:16242965|),UPSTREAM(MODIFIER||||Glyma01g00870|mRNA||PAC:16242966|)
Gm01	532279	C	T	EFF=UPSTREAM(MODIFIER||||Glyma01g00870|mRNA||PAC:16242965|),UPSTREAM(MODIFIER||||Glyma01g00870|mRNA||PAC:16242966|)
Gm01	567512	G	A	EFF=DOWNSTREAM(MODIFIER||||Glyma01g00910|mRNA||PAC:16242970|),UPSTREAM(MODIFIER||||Glyma01g00900|mRNA||PAC:16242969|)
Gm01	567530	GC	G	EFF=DOWNSTREAM(MODIFIER||||Glyma01g00910|mRNA||PAC:16242970|),UPSTREAM(MODIFIER||||Glyma01g00900|mRNA||PAC:16242969|)
Gm01	567581	T	A	EFF=DOWNSTREAM(MODIFIER||||Glyma01g00910|mRNA||PAC:16242970|),UPSTREAM(MODIFIER||||Glyma01g00900|mRNA||PAC:16242969|)
Gm01	669011	T	C	EFF=DOWNSTREAM(MODIFIER||||Glyma01g01010|mRNA||PAC:16242983|),DOWNSTREAM(MODIFIER||||Glyma01g01010|mRNA||PAC:16242984|),UPSTREAM(MODIFIER||||Glyma01g01020|mRNA||PAC:16242985|)
Gm01	776986	G	T	EFF=DOWNSTREAM(MODIFIER||||Glyma01g01140|mRNA||PAC:16242999|),DOWNSTREAM(MODIFIER||||Glyma01g01140|mRNA||PAC:16243000|),INTRON(MODIFIER||||Glyma01g01130|mRNA||PAC:16242998|)
Gm01	810601	T	A	EFF=SYNONYMOUS_CODING(LOW|SILENT|gcT/gcA|A1032|Glyma01g01160|mRNA||PAC:16243002|PAC:16243002.exon.7)
Gm01	818958	G	C	EFF=INTRON(MODIFIER||||Glyma01g01170|mRNA||PAC:16243003|),INTRON(MODIFIER||||Glyma01g01170|mRNA||PAC:16243004|)
Gm01	839271	G	A	EFF=INTRAGENIC(MODIFIER||||Glyma01g01190|mRNA|||)
Gm01	889828	A	G	EFF=INTERGENIC(MODIFIER||||||||)
Gm01	935525	G	C	EFF=DOWNSTREAM(MODIFIER||||Glyma01g01300|mRNA||PAC:16243019|),INTRON(MODIFIER||||Glyma01g01290|mRNA||PAC:16243018|)
Gm01	955154	T	C	EFF=SYNONYMOUS_CODING(LOW|SILENT|atT/atC|I153|Glyma01g01310|mRNA||PAC:16243020|PAC:16243020.exon.2),UPSTREAM(MODIFIER||||Glyma01g01310|mRNA||PAC:16243021|),UPSTREAM(MODIFIER||||Glyma01g01330|mRNA||PAC:16243023|)
Gm01	955172	T	C	EFF=SYNONYMOUS_CODING(LOW|SILENT|ttT/ttC|F159|Glyma01g01310|mRNA||PAC:16243020|PAC:16243020.exon.2),UPSTREAM(MODIFIER||||Glyma01g01310|mRNA||PAC:16243021|),UPSTREAM(MODIFIER||||Glyma01g01330|mRNA||PAC:16243023|)
Gm01	981476	T	C	EFF=INTRON(MODIFIER||||Glyma01g01360|mRNA||PAC:16243026|),UPSTREAM(MODIFIER||||Glyma01g01350|mRNA||PAC:16243025|)
Gm01	1066269	GAA	GAAA	EFF=DOWNSTREAM(MODIFIER||||Glyma01g01460|mRNA||PAC:16243038|),UTR_3_PRIME(MODIFIER||||Glyma01g01470|mRNA||PAC:16243039|PAC:16243039.exon.9)
Gm01	1203092	T	C	EFF=INTRON(MODIFIER||||Glyma01g01600|mRNA||PAC:16243051|),UPSTREAM(MODIFIER||||Glyma01g01590|mRNA||PAC:16243050|),UPSTREAM(MODIFIER||||Glyma01g01610|mRNA||PAC:16243052|),UPSTREAM(MODIFIER||||Glyma01g01610|mRNA||PAC:16243053|)
Gm01	1319693	C	T	EFF=SYNONYMOUS_CODING(LOW|SILENT|tcC/tcT|S53|Glyma01g01750|mRNA||PAC:16243068|PAC:16243068.exon.1),UPSTREAM(MODIFIER||||Glyma01g01740|mRNA||PAC:16243066|),UPSTREAM(MODIFIER||||Glyma01g01740|mRNA||PAC:16243067|)
Gm01	1336090	C	T	EFF=SYNONYMOUS_CODING(LOW|SILENT|ccC/ccT|P220|Glyma01g01770|mRNA||PAC:16243071|PAC:16243071.exon.2),SYNONYMOUS_CODING(LOW|SILENT|ccC/ccT|P301|Glyma01g01770|mRNA||PAC:16243070|PAC:16243070.exon.4)
Gm01	1340508	G	A	EFF=DOWNSTREAM(MODIFIER||||Glyma01g01770|mRNA||PAC:16243070|),DOWNSTREAM(MODIFIER||||Glyma01g01770|mRNA||PAC:16243071|),DOWNSTREAM(MODIFIER||||Glyma01g01780|mRNA||PAC:16243072|)
Gm01	1343593	G	A	EFF=SYNONYMOUS_CODING(LOW|SILENT|aaC/aaT|N962|Glyma01g01780|mRNA||PAC:16243072|PAC:16243072.exon.5)
Gm01	1343623	A	G	EFF=SYNONYMOUS_CODING(LOW|SILENT|tcT/tcC|S952|Glyma01g01780|mRNA||PAC:16243072|PAC:16243072.exon.5)
Gm01	1398394	C	A	EFF=DOWNSTREAM(MODIFIER||||Glyma01g01830|mRNA||PAC:16243080|),DOWNSTREAM(MODIFIER||||Glyma01g01840|mRNA||PAC:16243081|),DOWNSTREAM(MODIFIER||||Glyma01g01840|mRNA||PAC:16243082|)
Gm01	1486029	A	G	EFF=DOWNSTREAM(MODIFIER||||Glyma01g01900|mRNA||PAC:16243088|),DOWNSTREAM(MODIFIER||||Glyma01g01900|mRNA||PAC:16243089|),DOWNSTREAM(MODIFIER||||Glyma01g01900|mRNA||PAC:16243090|),DOWNSTREAM(MODIFIER||||Glyma01g01900|mRNA||PAC:16243091|),DOWNSTREAM(MODIFIER||||Glyma01g01900|mRNA||PAC:16243092|),DOWNSTREAM(MODIFIER||||Glyma01g01900|mRNA||PAC:16243093|),INTRON(MODIFIER||||Glyma01g01890|mRNA||PAC:1624…
Gm01	1486457	T	C	EFF=DOWNSTREAM(MODIFIER||||Glyma01g01900|mRNA||PAC:16243088|),DOWNSTREAM(MODIFIER||||Glyma01g01900|mRNA||PAC:16243089|),DOWNSTREAM(MODIFIER||||Glyma01g01900|mRNA||PAC:16243090|),DOWNSTREAM(MODIFIER||||Glyma01g01900|mRNA||PAC:16243091|),DOWNSTREAM(MODIFIER||||Glyma01g01900|mRNA||PAC:16243092|),DOWNSTREAM(MODIFIER||||Glyma01g01900|mRNA||PAC:16243093|),INTRON(MODIFIER||||Glyma01g01890|mRNA||PAC:1624…
Gm01	1486488	A	T	EFF=DOWNSTREAM(MODIFIER||||Glyma01g01900|mRNA||PAC:16243088|),DOWNSTREAM(MODIFIER||||Glyma01g01900|mRNA||PAC:16243089|),DOWNSTREAM(MODIFIER||||Glyma01g01900|mRNA||PAC:16243090|),DOWNSTREAM(MODIFIER||||Glyma01g01900|mRNA||PAC:16243091|),DOWNSTREAM(MODIFIER||||Glyma01g01900|mRNA||PAC:16243092|),DOWNSTREAM(MODIFIER||||Glyma01g01900|mRNA||PAC:16243093|),INTRON(MODIFIER||||Glyma01g01890|mRNA||PAC:1624…
Gm01	1486505	A	C	EFF=DOWNSTREAM(MODIFIER||||Glyma01g01900|mRNA||PAC:16243088|),DOWNSTREAM(MODIFIER||||Glyma01g01900|mRNA||PAC:16243089|),DOWNSTREAM(MODIFIER||||Glyma01g01900|mRNA||PAC:16243090|),DOWNSTREAM(MODIFIER||||Glyma01g01900|mRNA||PAC:16243091|),DOWNSTREAM(MODIFIER||||Glyma01g01900|mRNA||PAC:16243092|),DOWNSTREAM(MODIFIER||||Glyma01g01900|mRNA||PAC:16243093|),INTRON(MODIFIER||||Glyma01g01890|mRNA||PAC:1624…
Gm01	1486530	T	A	EFF=DOWNSTREAM(MODIFIER||||Glyma01g01900|mRNA||PAC:16243088|),DOWNSTREAM(MODIFIER||||Glyma01g01900|mRNA||PAC:16243089|),DOWNSTREAM(MODIFIER||||Glyma01g01900|mRNA||PAC:16243090|),DOWNSTREAM(MODIFIER||||Glyma01g01900|mRNA||PAC:16243091|),DOWNSTREAM(MODIFIER||||Glyma01g01900|mRNA||PAC:16243092|),DOWNSTREAM(MODIFIER||||Glyma01g01900|mRNA||PAC:16243093|),SYNONYMOUS_CODING(LOW|SILENT|gcT/gcA|A238|Glyma…
Gm01	1497604	A	G	EFF=UPSTREAM(MODIFIER||||Glyma01g01900|mRNA||PAC:16243088|),UPSTREAM(MODIFIER||||Glyma01g01900|mRNA||PAC:16243089|),UPSTREAM(MODIFIER||||Glyma01g01900|mRNA||PAC:16243090|),UPSTREAM(MODIFIER||||Glyma01g01900|mRNA||PAC:16243091|),UPSTREAM(MODIFIER||||Glyma01g01900|mRNA||PAC:16243092|),UPSTREAM(MODIFIER||||Glyma01g01900|mRNA||PAC:16243093|),UPSTREAM(MODIFIER||||Glyma01g01910|mRNA||PAC:16243094|),UPS…
Gm01	1505277	G	A	EFF=DOWNSTREAM(MODIFIER||||Glyma01g01910|mRNA||PAC:16243094|),DOWNSTREAM(MODIFIER||||Glyma01g01910|mRNA||PAC:16243095|),UTR_3_PRIME(MODIFIER||||Glyma01g01920|mRNA||PAC:16243096|PAC:16243096.exon.4)
Gm01	1505325	A	G	EFF=DOWNSTREAM(MODIFIER||||Glyma01g01910|mRNA||PAC:16243094|),DOWNSTREAM(MODIFIER||||Glyma01g01910|mRNA||PAC:16243095|),UTR_3_PRIME(MODIFIER||||Glyma01g01920|mRNA||PAC:16243096|PAC:16243096.exon.4)
Gm01	1505394	G	A	EFF=DOWNSTREAM(MODIFIER||||Glyma01g01910|mRNA||PAC:16243094|),DOWNSTREAM(MODIFIER||||Glyma01g01910|mRNA||PAC:16243095|),UTR_3_PRIME(MODIFIER||||Glyma01g01920|mRNA||PAC:16243096|PAC:16243096.exon.4)
Gm01	1700418	G	A	EFF=INTERGENIC(MODIFIER||||||||)
Gm01	1817736	A	G	EFF=SYNONYMOUS_CODING(LOW|SILENT|gtT/gtC|V234|Glyma01g02300|mRNA||PAC:16243139|PAC:16243139.exon.3)
Gm01	1818764	G	A	EFF=SYNONYMOUS_CODING(LOW|SILENT|Ctg/Ttg|L19|Glyma01g02300|mRNA||PAC:16243139|PAC:16243139.exon.2)
Gm01	1978792	A	G	EFF=INTRON(MODIFIER||||Glyma01g02420|mRNA||PAC:16243153|),UPSTREAM(MODIFIER||||Glyma01g02400|mRNA||PAC:16243152|)
Gm01	2119881	G	A	EFF=UPSTREAM(MODIFIER||||Glyma01g02580|mRNA||PAC:16243171|)
Gm01	2202114	C	T	EFF=DOWNSTREAM(MODIFIER||||Glyma01g02680|mRNA||PAC:16243183|),DOWNSTREAM(MODIFIER||||Glyma01g02700|mRNA||PAC:16243184|),DOWNSTREAM(MODIFIER||||Glyma01g02710|mRNA||PAC:16243185|),UPSTREAM(MODIFIER||||Glyma01g02720|mRNA||PAC:16243186|)
Gm01	2202131	TC	T	EFF=DOWNSTREAM(MODIFIER||||Glyma01g02680|mRNA||PAC:16243183|),DOWNSTREAM(MODIFIER||||Glyma01g02700|mRNA||PAC:16243184|),DOWNSTREAM(MODIFIER||||Glyma01g02710|mRNA||PAC:16243185|),UPSTREAM(MODIFIER||||Glyma01g02720|mRNA||PAC:16243186|)
Gm01	2205338	C	T	EFF=DOWNSTREAM(MODIFIER||||Glyma01g02700|mRNA||PAC:16243184|),SYNONYMOUS_CODING(LOW|SILENT|atC/atT|I32|Glyma01g02720|mRNA||PAC:16243186|PAC:16243186.exon.1),UPSTREAM(MODIFIER||||Glyma01g02710|mRNA||PAC:16243185|),UPSTREAM(MODIFIER||||Glyma01g02740|mRNA||PAC:16243188|)
Gm01	2205668	A	C	EFF=DOWNSTREAM(MODIFIER||||Glyma01g02700|mRNA||PAC:16243184|),SYNONYMOUS_CODING(LOW|SILENT|ctA/ctC|L99|Glyma01g02720|mRNA||PAC:16243186|PAC:16243186.exon.2),UPSTREAM(MODIFIER||||Glyma01g02710|mRNA||PAC:16243185|),UPSTREAM(MODIFIER||||Glyma01g02740|mRNA||PAC:16243188|)
Gm01	2281511	A	G	EFF=DOWNSTREAM(MODIFIER||||Glyma01g02780|mRNA||PAC:16243192|),NON_SYNONYMOUS_CODING(MODERATE|MISSENSE|Tct/Cct|S585P|Glyma01g02790|mRNA||PAC:16243193|PAC:16243193.exon.11)
Gm01	2281527	T	C	EFF=DOWNSTREAM(MODIFIER||||Glyma01g02780|mRNA||PAC:16243192|),SYNONYMOUS_CODING(LOW|SILENT|tcA/tcG|S579|Glyma01g02790|mRNA||PAC:16243193|PAC:16243193.exon.11)
Gm01	2283212	T	C	EFF=DOWNSTREAM(MODIFIER||||Glyma01g02780|mRNA||PAC:16243192|),SYNONYMOUS_CODING(LOW|SILENT|ctA/ctG|L331|Glyma01g02790|mRNA||PAC:16243193|PAC:16243193.exon.7)
Gm01	2498808	TAA	TA	EFF=INTRON(MODIFIER||||Glyma01g03020|mRNA||PAC:16243217|)
Gm01	2498810	AC	A	EFF=INTRON(MODIFIER||||Glyma01g03020|mRNA||PAC:16243217|)
Gm01	2523921	C	G	EFF=INTRON(MODIFIER||||Glyma01g03030|mRNA||PAC:16243218|)
Gm01	2722568	G	A	EFF=INTRON(MODIFIER||||Glyma01g03160|mRNA||PAC:16243233|),INTRON(MODIFIER||||Glyma01g03160|mRNA||PAC:16243234|)
Gm01	2754012	A	T	EFF=DOWNSTREAM(MODIFIER||||Glyma01g03210|mRNA||PAC:16243240|),NON_SYNONYMOUS_CODING(MODERATE|MISSENSE|tTt/tAt|F237Y|Glyma01g03220|mRNA||PAC:16243241|PAC:16243241.exon.3)
Gm01	2816856	T	A	EFF=DOWNSTREAM(MODIFIER||||Glyma01g03310|mRNA||PAC:16243252|)
Gm01	2868701	C	T	EFF=DOWNSTREAM(MODIFIER||||Glyma01g03380|mRNA||PAC:16243264|)
Gm01	3117838	T	A	EFF=NON_SYNONYMOUS_CODING(MODERATE|MISSENSE|Tct/Act|S124T|Glyma01g03600|mRNA||PAC:16243286|PAC:16243286.exon.3),NON_SYNONYMOUS_CODING(MODERATE|MISSENSE|Tct/Act|S124T|Glyma01g03600|mRNA||PAC:16243287|PAC:16243287.exon.3),UPSTREAM(MODIFIER||||Glyma01g03610|mRNA||PAC:16243288|),UPSTREAM(MODIFIER||||Glyma01g03610|mRNA||PAC:16243289|)
Gm01	3144992	T	C	EFF=UTR_5_PRIME(MODIFIER||||Glyma01g03670|mRNA||PAC:16243298|PAC:16243298.exon.1)
Gm01	3145003	C	T	EFF=UTR_5_PRIME(MODIFIER||||Glyma01g03670|mRNA||PAC:16243298|PAC:16243298.exon.1)
Gm01	3145007	C	G	EFF=START_GAINED(LOW||||Glyma01g03670|mRNA||PAC:16243298|PAC:16243298.exon.1)
Gm01	3145235	T	C	EFF=SYNONYMOUS_CODING(LOW|SILENT|cgT/cgC|R69|Glyma01g03670|mRNA||PAC:16243298|PAC:16243298.exon.1)
Gm01	3188814	CGGGG	CGGGGG	EFF=DOWNSTREAM(MODIFIER||||Glyma01g03720|mRNA||PAC:16243304|),DOWNSTREAM(MODIFIER||||Glyma01g03720|mRNA||PAC:16243305|),DOWNSTREAM(MODIFIER||||Glyma01g03720|mRNA||PAC:16243306|),DOWNSTREAM(MODIFIER||||Glyma01g03720|mRNA||PAC:16243307|),DOWNSTREAM(MODIFIER||||Glyma01g03720|mRNA||PAC:16243308|),DOWNSTREAM(MODIFIER||||Glyma01g03720|mRNA||PAC:16243309|),INTRON(MODIFIER||||Glyma01g03730|mRNA||PAC:1624…
Gm01	3188873	G	T	EFF=DOWNSTREAM(MODIFIER||||Glyma01g03720|mRNA||PAC:16243304|),DOWNSTREAM(MODIFIER||||Glyma01g03720|mRNA||PAC:16243305|),DOWNSTREAM(MODIFIER||||Glyma01g03720|mRNA||PAC:16243306|),DOWNSTREAM(MODIFIER||||Glyma01g03720|mRNA||PAC:16243307|),DOWNSTREAM(MODIFIER||||Glyma01g03720|mRNA||PAC:16243308|),DOWNSTREAM(MODIFIER||||Glyma01g03720|mRNA||PAC:16243309|),INTRON(MODIFIER||||Glyma01g03730|mRNA||PAC:1624…
Gm01	3263759	T	C	EFF=NON_SYNONYMOUS_CODING(MODERATE|MISSENSE|Att/Gtt|I490V|Glyma01g03820|mRNA||PAC:16243318|PAC:16243318.exon.11)
Gm01	3409626	TCAC	TCACAC	EFF=DOWNSTREAM(MODIFIER||||Glyma01g03940|mRNA||PAC:16243330|),INTRON(MODIFIER||||Glyma01g03930|mRNA||PAC:16243329|)
Gm01	3409679	G	T	EFF=DOWNSTREAM(MODIFIER||||Glyma01g03940|mRNA||PAC:16243330|),INTRON(MODIFIER||||Glyma01g03930|mRNA||PAC:16243329|)
Gm01	3416159	T	A	EFF=UPSTREAM(MODIFIER||||Glyma01g03940|mRNA||PAC:16243330|)
Gm01	3416191	A	T	EFF=UPSTREAM(MODIFIER||||Glyma01g03940|mRNA||PAC:16243330|)
Gm01	3431800	G	A	EFF=DOWNSTREAM(MODIFIER||||Glyma01g03960|mRNA||PAC:16243332|)
Gm01	3595362	A	T	EFF=INTRON(MODIFIER||||Glyma01g04140|mRNA||PAC:16243352|),UPSTREAM(MODIFIER||||Glyma01g04130|mRNA||PAC:16243351|)
Gm01	3595471	G	A	EFF=NON_SYNONYMOUS_CODING(MODERATE|MISSENSE|Cat/Tat|H53Y|Glyma01g04140|mRNA||PAC:16243352|PAC:16243352.exon.1),UPSTREAM(MODIFIER||||Glyma01g04130|mRNA||PAC:16243351|)
Gm01	3722961	A	G	EFF=DOWNSTREAM(MODIFIER||||Glyma01g04230|mRNA||PAC:16243364|)
Gm01	3790945	T	G	EFF=INTERGENIC(MODIFIER||||||||)
Gm01	4029838	CAAAAAAA	CAAAAAAAA	EFF=INTRON(MODIFIER||||Glyma01g04490|mRNA||PAC:16243393|),INTRON(MODIFIER||||Glyma01g04490|mRNA||PAC:16243394|),INTRON(MODIFIER||||Glyma01g04490|mRNA||PAC:16243395|)
Gm01	4823595	T	A	EFF=NON_SYNONYMOUS_CODING(MODERATE|MISSENSE|aaA/aaT|K200N|Glyma01g05160|mRNA||PAC:16243469|PAC:16243469.exon.6),NON_SYNONYMOUS_CODING(MODERATE|MISSENSE|aaA/aaT|K309N|Glyma01g05160|mRNA||PAC:16243468|PAC:16243468.exon.6)
Gm01	4926132	T	C	EFF=INTERGENIC(MODIFIER||||||||)
Gm01	4926147	T	C	EFF=INTERGENIC(MODIFIER||||||||)
Gm01	4926153	T	C	EFF=INTERGENIC(MODIFIER||||||||)
Gm01	5159236	A	G	EFF=INTERGENIC(MODIFIER||||||||)
Gm01	5472508	G	A	EFF=INTRON(MODIFIER||||Glyma01g05740|mRNA||PAC:16243531|)
Gm01	5479970	T	C	EFF=INTERGENIC(MODIFIER||||||||)
Gm01	5496880	A	G	EFF=INTRON(MODIFIER||||Glyma01g05750|mRNA||PAC:16243532|)
Gm01	5502858	A	C	EFF=DOWNSTREAM(MODIFIER||||Glyma01g05750|mRNA||PAC:16243532|)
Gm01	5998632	G	A	EFF=INTERGENIC(MODIFIER||||||||)
Gm01	6504273	T	C	EFF=INTERGENIC(MODIFIER||||||||)
Gm01	6566576	C	T	EFF=INTERGENIC(MODIFIER||||||||)
Gm01	6566936	A	T	EFF=INTERGENIC(MODIFIER||||||||)
Gm01	6567056	G	A	EFF=INTERGENIC(MODIFIER||||||||)
Gm01	6671671	G	A	EFF=INTERGENIC(MODIFIER||||||||)
Gm01	7128467	C	T	EFF=DOWNSTREAM(MODIFIER||||Glyma01g06730|mRNA||PAC:16243632|)
Gm01	7198736	T	C	EFF=SYNONYMOUS_CODING(LOW|SILENT|tgT/tgC|C99|Glyma01g06780|mRNA||PAC:16243641|PAC:16243641.exon.4)
Gm01	7198771	T	C	EFF=INTRON(MODIFIER||||Glyma01g06780|mRNA||PAC:16243641|)
Gm01	7310917	G	A	EFF=INTERGENIC(MODIFIER||||||||)
Gm01	7310943	A	C	EFF=INTERGENIC(MODIFIER||||||||)
Gm01	7310959	C	T	EFF=INTERGENIC(MODIFIER||||||||)
Gm01	7726869	A	G	EFF=INTRAGENIC(MODIFIER||||Glyma01g07130|mRNA|||)
Gm01	7726953	G	A	EFF=INTRAGENIC(MODIFIER||||Glyma01g07130|mRNA|||)
Gm01	10404307	G	A	EFF=INTERGENIC(MODIFIER||||||||)
Gm01	14052309	A	G	EFF=INTERGENIC(MODIFIER||||||||)
Gm01	14551188	A	G	EFF=INTERGENIC(MODIFIER||||||||)
Gm01	14551410	G	A	EFF=INTERGENIC(MODIFIER||||||||)
Gm01	14660941	T	C	EFF=INTERGENIC(MODIFIER||||||||)
Gm01	15141983	A	G	EFF=INTERGENIC(MODIFIER||||||||)
Gm01	15291057	G	A	EFF=INTERGENIC(MODIFIER||||||||)
Gm01	15732755	G	A	EFF=INTERGENIC(MODIFIER||||||||)
Gm01	15824804	A	C	EFF=INTERGENIC(MODIFIER||||||||)
Gm01	16135660	T	A	EFF=NON_SYNONYMOUS_CODING(MODERATE|MISSENSE|cAc/cTc|H60L|Glyma01g12970|mRNA||PAC:16243999|PAC:16243999.exon.1)
Gm01	16388487	T	C	EFF=INTERGENIC(MODIFIER||||||||)
Gm01	16714362	A	C	EFF=INTERGENIC(MODIFIER||||||||)
Gm01	16714390	A	G	EFF=INTERGENIC(MODIFIER||||||||)
Gm01	16714450	T	A	EFF=INTERGENIC(MODIFIER||||||||)
Gm01	16714561	A	G	EFF=INTERGENIC(MODIFIER||||||||)
Gm01	16714691	A	C	EFF=INTERGENIC(MODIFIER||||||||)
Gm01	16714694	C	A	EFF=INTERGENIC(MODIFIER||||||||)
Gm01	16714716	G	A	EFF=INTERGENIC(MODIFIER||||||||)
Gm01	16714953	G	C	EFF=INTERGENIC(MODIFIER||||||||)
Gm01	16718953	T	A	EFF=INTERGENIC(MODIFIER||||||||)
Gm01	16802629	C	T	EFF=INTERGENIC(MODIFIER||||||||)
Gm01	16802636	G	A	EFF=INTERGENIC(MODIFIER||||||||)
Gm01	16854684	A	C	EFF=INTERGENIC(MODIFIER||||||||)
Gm01	17145640	TC	T	EFF=INTERGENIC(MODIFIER||||||||)
Gm01	17858575	T	C	EFF=INTERGENIC(MODIFIER||||||||)
Gm01	18348693	C	T	EFF=INTERGENIC(MODIFIER||||||||)
Gm01	18348712	A	G	EFF=INTERGENIC(MODIFIER||||||||)
Gm01	18348783	C	T	EFF=INTERGENIC(MODIFIER||||||||)
Gm01	19317451	A	G	EFF=INTERGENIC(MODIFIER||||||||)
Gm01	19317498	G	C	EFF=INTERGENIC(MODIFIER||||||||)
Gm01	19878895	C	T	EFF=INTERGENIC(MODIFIER||||||||)
Gm01	19879088	C	G	EFF=INTERGENIC(MODIFIER||||||||)
Gm01	19879104	T	C	EFF=INTERGENIC(MODIFIER||||||||)
Gm01	21048012	A	G	EFF=INTERGENIC(MODIFIER||||||||)
Gm01	21048022	T	C	EFF=INTERGENIC(MODIFIER||||||||)
Gm01	21048051	C	T	EFF=INTERGENIC(MODIFIER||||||||)
Gm01	25063854	C	T	EFF=INTERGENIC(MODIFIER||||||||)
Gm01	25064237	T	A	EFF=INTERGENIC(MODIFIER||||||||)
Gm01	25064245	A	G	EFF=INTERGENIC(MODIFIER||||||||)
Gm01	25733282	G	T	EFF=INTERGENIC(MODIFIER||||||||)
Gm01	28177957	A	G	EFF=INTERGENIC(MODIFIER||||||||)
Gm01	29185984	T	A	EFF=INTERGENIC(MODIFIER||||||||)
Gm01	29185994	A	G	EFF=INTERGENIC(MODIFIER||||||||)
Gm01	29211598	A	G	EFF=INTERGENIC(MODIFIER||||||||)
Gm01	29645617	G	A	EFF=INTERGENIC(MODIFIER||||||||)
Gm01	29674325	G	A	EFF=INTERGENIC(MODIFIER||||||||)
Gm01	29823966	G	C	EFF=INTERGENIC(MODIFIER||||||||)
Gm01	30123131	G	A	EFF=INTRON(MODIFIER||||Glyma01g23390|mRNA||PAC:16244323|)
Gm01	31163850	T	C	EFF=DOWNSTREAM(MODIFIER||||Glyma01g24090|mRNA||PAC:16244352|)
Gm01	31163857	C	T	EFF=DOWNSTREAM(MODIFIER||||Glyma01g24090|mRNA||PAC:16244352|)
Gm01	31164344	T	G	EFF=DOWNSTREAM(MODIFIER||||Glyma01g24090|mRNA||PAC:16244352|)
Gm01	31164553	C	T	EFF=DOWNSTREAM(MODIFIER||||Glyma01g24090|mRNA||PAC:16244352|)
Gm01	31323643	A	G	EFF=INTERGENIC(MODIFIER||||||||)
Gm01	34320497	A	G	EFF=INTERGENIC(MODIFIER||||||||)
Gm01	34947275	G	A	EFF=INTERGENIC(MODIFIER||||||||)
Gm01	35788030	A	G	EFF=INTERGENIC(MODIFIER||||||||)
Gm01	35798463	G	A	EFF=INTERGENIC(MODIFIER||||||||)
Gm01	35966625	CT	C	EFF=DOWNSTREAM(MODIFIER||||Glyma01g26970|mRNA||PAC:16244537|),UPSTREAM(MODIFIER||||Glyma01g26980|mRNA||PAC:16244538|),UPSTREAM(MODIFIER||||Glyma01g26980|mRNA||PAC:16244539|),UPSTREAM(MODIFIER||||Glyma01g26990|mRNA||PAC:16244540|)
Gm01	36064252	A	G	EFF=SYNONYMOUS_CODING(LOW|SILENT|ctT/ctC|L229|Glyma01g27060|mRNA||PAC:16244547|PAC:16244547.exon.1)
Gm01	36081001	T	A	EFF=INTERGENIC(MODIFIER||||||||)
Gm01	36081005	G	A	EFF=INTERGENIC(MODIFIER||||||||)
Gm01	36081041	C	T	EFF=INTERGENIC(MODIFIER||||||||)
Gm01	36737201	T	A	EFF=DOWNSTREAM(MODIFIER||||Glyma01g27480|mRNA||PAC:16244589|),UPSTREAM(MODIFIER||||Glyma01g27470|mRNA||PAC:16244588|)
Gm01	36990392	C	A	EFF=SYNONYMOUS_CODING(LOW|SILENT|acC/acA|T305|Glyma01g27710|mRNA||PAC:16244593|PAC:16244593.exon.5)
Gm01	36996735	T	G	EFF=DOWNSTREAM(MODIFIER||||Glyma01g27710|mRNA||PAC:16244593|)
Gm01	37185687	C	T	EFF=INTERGENIC(MODIFIER||||||||)
Gm01	37222112	G	A	EFF=INTERGENIC(MODIFIER||||||||)
Gm01	37415557	T	C	EFF=INTERGENIC(MODIFIER||||||||)
Gm01	37828730	C	T	EFF=INTERGENIC(MODIFIER||||||||)
Gm01	37841901	C	A	EFF=INTERGENIC(MODIFIER||||||||)
Gm01	38096930	C	T	EFF=INTERGENIC(MODIFIER||||||||)
Gm01	38096974	G	A	EFF=INTERGENIC(MODIFIER||||||||)
Gm01	38421878	G	A	EFF=UPSTREAM(MODIFIER||||Glyma01g28550|mRNA||PAC:16244657|)
Gm01	38453970	C	T	EFF=INTERGENIC(MODIFIER||||||||)
Gm01	38454002	T	G	EFF=INTERGENIC(MODIFIER||||||||)
Gm01	38662334	T	A	EFF=DOWNSTREAM(MODIFIER||||Glyma01g28800|mRNA||PAC:16244663|)
Gm01	38662350	T	C	EFF=DOWNSTREAM(MODIFIER||||Glyma01g28800|mRNA||PAC:16244663|)
Gm01	38662368	C	A	EFF=DOWNSTREAM(MODIFIER||||Glyma01g28800|mRNA||PAC:16244663|)
Gm01	38738773	A	G	EFF=INTERGENIC(MODIFIER||||||||)
Gm01	38738815	ATTTTTTTTT	ATTTTTTTTTT	EFF=INTERGENIC(MODIFIER||||||||)
Gm01	38742258	A	G	EFF=INTERGENIC(MODIFIER||||||||)
Gm01	38742266	G	A	EFF=INTERGENIC(MODIFIER||||||||)
Gm01	38823818	C	T	EFF=DOWNSTREAM(MODIFIER||||Glyma01g28880|mRNA||PAC:16244675|),DOWNSTREAM(MODIFIER||||Glyma01g28890|mRNA||PAC:16244676|)
Gm01	38863577	A	G	EFF=INTERGENIC(MODIFIER||||||||)
Gm01	39026589	A	C	EFF=INTERGENIC(MODIFIER||||||||)
Gm01	39251460	G	A	EFF=INTRON(MODIFIER||||Glyma01g29150|mRNA||PAC:16244702|)
Gm01	39255839	G	A	EFF=DOWNSTREAM(MODIFIER||||Glyma01g29150|mRNA||PAC:16244702|)
Gm01	39255861	G	T	EFF=DOWNSTREAM(MODIFIER||||Glyma01g29150|mRNA||PAC:16244702|)
Gm01	40370330	G	A	EFF=INTERGENIC(MODIFIER||||||||)
Gm01	40385522	A	G	EFF=INTERGENIC(MODIFIER||||||||)
Gm01	40422441	T	C	EFF=INTERGENIC(MODIFIER||||||||)
Gm01	40561460	T	C	EFF=NON_SYNONYMOUS_CODING(MODERATE|MISSENSE|tAt/tGt|Y174C|Glyma01g29950|mRNA||PAC:16244781|PAC:16244781.exon.5)
Gm01	40877156	A	G	EFF=INTERGENIC(MODIFIER||||||||)
Gm01	40877192	G	A	EFF=INTERGENIC(MODIFIER||||||||)
Gm01	41038278	A	G	EFF=INTERGENIC(MODIFIER||||||||)
Gm01	41038301	A	C	EFF=INTERGENIC(MODIFIER||||||||)
Gm01	41070596	G	C	EFF=DOWNSTREAM(MODIFIER||||Glyma01g30390|mRNA||PAC:16244805|),INTRON(MODIFIER||||Glyma01g30400|mRNA||PAC:16244806|)
Gm01	41070661	G	A	EFF=DOWNSTREAM(MODIFIER||||Glyma01g30390|mRNA||PAC:16244805|),INTRON(MODIFIER||||Glyma01g30400|mRNA||PAC:16244806|)
Gm01	41175721	C	T	EFF=INTRAGENIC(MODIFIER||||Glyma01g30470|mRNA|||)
Gm01	41175896	T	C	EFF=INTRAGENIC(MODIFIER||||Glyma01g30470|mRNA|||)
Gm01	41267840	C	T	EFF=INTERGENIC(MODIFIER||||||||)
Gm01	41383496	C	T	EFF=INTERGENIC(MODIFIER||||||||)
Gm01	41556885	G	A	EFF=INTERGENIC(MODIFIER||||||||)
Gm01	41687300	T	C	EFF=DOWNSTREAM(MODIFIER||||Glyma01g30920|mRNA||PAC:16244838|),INTRON(MODIFIER||||Glyma01g30910|mRNA||PAC:16244837|)
Gm01	41717327	C	T	EFF=INTERGENIC(MODIFIER||||||||)
Gm01	41717341	C	T	EFF=INTERGENIC(MODIFIER||||||||)
Gm01	41987250	A	G	EFF=NON_SYNONYMOUS_CODING(MODERATE|MISSENSE|Atc/Gtc|I154V|Glyma01g31170|mRNA||PAC:16244843|PAC:16244843.exon.1)
Gm01	41987288	T	G	EFF=SYNONYMOUS_CODING(LOW|SILENT|ctT/ctG|L166|Glyma01g31170|mRNA||PAC:16244843|PAC:16244843.exon.1)
Gm01	41990142	C	T	EFF=SYNONYMOUS_CODING(LOW|SILENT|tgC/tgT|C850|Glyma01g31170|mRNA||PAC:16244843|PAC:16244843.exon.3),UPSTREAM(MODIFIER||||Glyma01g31180|mRNA||PAC:16244844|)
Gm01	42059679	G	A	EFF=UPSTREAM(MODIFIER||||Glyma01g31260|mRNA||PAC:16244848|)
Gm01	42059697	C	A	EFF=UPSTREAM(MODIFIER||||Glyma01g31260|mRNA||PAC:16244848|)
Gm01	42235567	G	GC	EFF=INTRON(MODIFIER||||Glyma01g31360|mRNA||PAC:16244858|),INTRON(MODIFIER||||Glyma01g31360|mRNA||PAC:16244859|),INTRON(MODIFIER||||Glyma01g31360|mRNA||PAC:16244860|)
Gm01	42383465	C	T	EFF=SYNONYMOUS_CODING(LOW|SILENT|ccC/ccT|P635|Glyma01g31480|mRNA||PAC:16244873|PAC:16244873.exon.2)
Gm01	42636104	ATTTTTTTTT	ATTTTTTTTTT	EFF=UPSTREAM(MODIFIER||||Glyma01g31610|mRNA||PAC:16244884|),UPSTREAM(MODIFIER||||Glyma01g31620|mRNA||PAC:16244885|)
Gm01	42774279	A	G	EFF=INTERGENIC(MODIFIER||||||||)
Gm01	42822875	G	A	EFF=INTERGENIC(MODIFIER||||||||)
Gm01	42822908	G	A	EFF=INTERGENIC(MODIFIER||||||||)
Gm01	43073832	T	G	EFF=DOWNSTREAM(MODIFIER||||Glyma01g31840|mRNA||PAC:16244907|)
Gm01	43252398	A	G	EFF=INTRON(MODIFIER||||Glyma01g31990|mRNA||PAC:16244922|)
Gm01	43252420	G	T	EFF=INTRON(MODIFIER||||Glyma01g31990|mRNA||PAC:16244922|)
Gm01	43252427	A	T	EFF=INTRON(MODIFIER||||Glyma01g31990|mRNA||PAC:16244922|)
Gm01	43265761	A	T	EFF=INTRON(MODIFIER||||Glyma01g32000|mRNA||PAC:16244923|)
Gm01	43269434	T	C	EFF=NON_SYNONYMOUS_CODING(MODERATE|MISSENSE|Aat/Gat|N415D|Glyma01g32000|mRNA||PAC:16244923|PAC:16244923.exon.6)
Gm01	43361558	G	A	EFF=INTERGENIC(MODIFIER||||||||)
Gm01	43720615	A	C	EFF=NON_SYNONYMOUS_CODING(MODERATE|MISSENSE|cAt/cCt|H5P|Glyma01g32270|mRNA||PAC:16244950|PAC:16244950.exon.1)
Gm01	43872257	A	G	EFF=NON_SYNONYMOUS_CODING(MODERATE|MISSENSE|atA/atG|I275M|Glyma01g32380|mRNA||PAC:16244960|PAC:16244960.exon.2)
Gm01	43872272	A	G	EFF=SYNONYMOUS_CODING(LOW|SILENT|caA/caG|Q280|Glyma01g32380|mRNA||PAC:16244960|PAC:16244960.exon.2)
Gm01	43872309	G	A	EFF=NON_SYNONYMOUS_CODING(MODERATE|MISSENSE|Gtt/Att|V293I|Glyma01g32380|mRNA||PAC:16244960|PAC:16244960.exon.2)
Gm01	43978574	A	G	EFF=DOWNSTREAM(MODIFIER||||Glyma01g32430|mRNA||PAC:16244968|)
Gm01	44091885	C	T	EFF=DOWNSTREAM(MODIFIER||||Glyma01g32480|mRNA||PAC:16244973|)
Gm01	44385767	T	A	EFF=DOWNSTREAM(MODIFIER||||Glyma01g32800|mRNA||PAC:16244985|),INTRON(MODIFIER||||Glyma01g32810|mRNA||PAC:16244986|)
Gm01	44753344	C	G	EFF=DOWNSTREAM(MODIFIER||||Glyma01g33070|mRNA||PAC:16245006|),DOWNSTREAM(MODIFIER||||Glyma01g33070|mRNA||PAC:16245007|),DOWNSTREAM(MODIFIER||||Glyma01g33070|mRNA||PAC:16245008|)
Gm01	46051954	C	T	EFF=INTERGENIC(MODIFIER||||||||)
Gm01	46416299	C	T	EFF=INTERGENIC(MODIFIER||||||||)
Gm01	46416332	C	T	EFF=INTERGENIC(MODIFIER||||||||)
Gm01	46622339	A	G	EFF=INTERGENIC(MODIFIER||||||||)
Gm01	46870707	A	T	EFF=SYNONYMOUS_CODING(LOW|SILENT|atA/atT|I102|Glyma01g34520|mRNA||PAC:16245150|PAC:16245150.exon.1)
Gm01	46870776	G	A	EFF=SYNONYMOUS_CODING(LOW|SILENT|ggG/ggA|G125|Glyma01g34520|mRNA||PAC:16245150|PAC:16245150.exon.1)
Gm01	46896921	T	C	EFF=INTERGENIC(MODIFIER||||||||)
Gm01	46896962	T	C	EFF=INTERGENIC(MODIFIER||||||||)
Gm01	46896974	T	C	EFF=INTERGENIC(MODIFIER||||||||)
Gm01	46897211	T	A,G	EFF=INTERGENIC(MODIFIER||||||||)
Gm01	46897262	A	G	EFF=INTERGENIC(MODIFIER||||||||)
Gm01	46897282	T	C	EFF=INTERGENIC(MODIFIER||||||||)
Gm01	47062573	A	G	EFF=INTRON(MODIFIER||||Glyma01g34630|mRNA||PAC:16245161|),INTRON(MODIFIER||||Glyma01g34630|mRNA||PAC:16245162|)
Gm01	47062626	T	C	EFF=INTRON(MODIFIER||||Glyma01g34630|mRNA||PAC:16245161|),INTRON(MODIFIER||||Glyma01g34630|mRNA||PAC:16245162|)
Gm01	47063727	A	G	EFF=INTRON(MODIFIER||||Glyma01g34630|mRNA||PAC:16245161|),INTRON(MODIFIER||||Glyma01g34630|mRNA||PAC:16245162|)
Gm01	47063753	C	A	EFF=INTRON(MODIFIER||||Glyma01g34630|mRNA||PAC:16245161|),INTRON(MODIFIER||||Glyma01g34630|mRNA||PAC:16245162|)
Gm01	47063814	A	T	EFF=INTRON(MODIFIER||||Glyma01g34630|mRNA||PAC:16245161|),INTRON(MODIFIER||||Glyma01g34630|mRNA||PAC:16245162|)
Gm01	47066303	G	A	EFF=INTRON(MODIFIER||||Glyma01g34630|mRNA||PAC:16245161|),INTRON(MODIFIER||||Glyma01g34630|mRNA||PAC:16245162|)
Gm01	47397958	C	T	EFF=UPSTREAM(MODIFIER||||Glyma01g34900|mRNA||PAC:16245191|)
Gm01	47523128	T	G	EFF=DOWNSTREAM(MODIFIER||||Glyma01g34990|mRNA||PAC:16245199|),UPSTREAM(MODIFIER||||Glyma01g34980|mRNA||PAC:16245198|)
Gm01	47523188	T	A	EFF=DOWNSTREAM(MODIFIER||||Glyma01g34990|mRNA||PAC:16245199|),UPSTREAM(MODIFIER||||Glyma01g34980|mRNA||PAC:16245198|)
Gm01	47678130	A	G	EFF=NON_SYNONYMOUS_CODING(MODERATE|MISSENSE|Act/Gct|T273A|Glyma01g35110|mRNA||PAC:16245210|PAC:16245210.exon.3),UPSTREAM(MODIFIER||||Glyma01g35120|mRNA||PAC:16245211|)
Gm01	47832898	G	A	EFF=DOWNSTREAM(MODIFIER||||Glyma01g35290|mRNA||PAC:16245235|),NON_SYNONYMOUS_CODING(MODERATE|MISSENSE|aCt/aTt|T60I|Glyma01g35300|mRNA||PAC:16245236|PAC:16245236.exon.2)
Gm01	47876895	T	G	EFF=SYNONYMOUS_CODING(LOW|SILENT|gtT/gtG|V5|Glyma01g35370|mRNA||PAC:16245243|PAC:16245243.exon.1)
Gm01	47934571	G	A	EFF=DOWNSTREAM(MODIFIER||||Glyma01g35430|mRNA||PAC:16245249|),DOWNSTREAM(MODIFIER||||Glyma01g35440|mRNA||PAC:16245250|),SYNONYMOUS_CODING(LOW|SILENT|gaC/gaT|D445|Glyma01g35450|mRNA||PAC:16245251|PAC:16245251.exon.3)
Gm01	47935951	C	A	EFF=DOWNSTREAM(MODIFIER||||Glyma01g35430|mRNA||PAC:16245249|),DOWNSTREAM(MODIFIER||||Glyma01g35440|mRNA||PAC:16245250|),SYNONYMOUS_CODING(LOW|SILENT|gcG/gcT|A156|Glyma01g35450|mRNA||PAC:16245251|PAC:16245251.exon.2)
Gm01	47989727	T	C	EFF=DOWNSTREAM(MODIFIER||||Glyma01g35500|mRNA||PAC:16245258|)
Gm01	48097876	G	T	EFF=INTERGENIC(MODIFIER||||||||)
Gm01	48150927	G	A	EFF=INTRON(MODIFIER||||Glyma01g35640|mRNA||PAC:16245274|)
Gm01	48221904	A	G	EFF=SYNONYMOUS_CODING(LOW|SILENT|Tta/Cta|L84|Glyma01g35680|mRNA||PAC:16245279|PAC:16245279.exon.1)
Gm01	48221907	T	C	EFF=NON_SYNONYMOUS_CODING(MODERATE|MISSENSE|Aca/Gca|T83A|Glyma01g35680|mRNA||PAC:16245279|PAC:16245279.exon.1)
Gm01	48322026	T	C	EFF=INTRON(MODIFIER||||Glyma01g35820|mRNA||PAC:16245293|)
Gm01	48322127	C	A	EFF=NON_SYNONYMOUS_CODING(MODERATE|MISSENSE|gCg/gAg|A89E|Glyma01g35820|mRNA||PAC:16245293|PAC:16245293.exon.2)
Gm01	48381706	A	C	EFF=INTRON(MODIFIER||||Glyma01g35940|mRNA||PAC:16245305|)
Gm01	48508042	C	T	EFF=NON_SYNONYMOUS_CODING(MODERATE|MISSENSE|cCg/cTg|P413L|Glyma01g36040|mRNA||PAC:16245318|PAC:16245318.exon.9)
Gm01	48508105	C	G	EFF=INTRON(MODIFIER||||Glyma01g36040|mRNA||PAC:16245318|)
Gm01	48526784	T	G	EFF=INTRON(MODIFIER||||Glyma01g36070|mRNA||PAC:16245321|)
Gm01	48526835	T	C	EFF=INTRON(MODIFIER||||Glyma01g36070|mRNA||PAC:16245321|)
Gm01	48572133	T	C	EFF=DOWNSTREAM(MODIFIER||||Glyma01g36090|mRNA||PAC:16245323|)
Gm01	48744630	A	G	EFF=DOWNSTREAM(MODIFIER||||Glyma01g36250|mRNA||PAC:16245339|),SYNONYMOUS_CODING(LOW|SILENT|aaA/aaG|K108|Glyma01g36260|mRNA||PAC:16245340|PAC:16245340.exon.2)
Gm01	48767814	T	C	EFF=DOWNSTREAM(MODIFIER||||Glyma01g36280|mRNA||PAC:16245342|),UTR_3_PRIME(MODIFIER||||Glyma01g36290|mRNA||PAC:16245343|PAC:16245343.exon.5)
Gm01	48852941	G	A	EFF=INTRON(MODIFIER||||Glyma01g36380|mRNA||PAC:16245353|)
Gm01	48985570	T	A	EFF=INTRAGENIC(MODIFIER||||Glyma01g36470|mRNA|||),UPSTREAM(MODIFIER||||Glyma01g36480|mRNA||PAC:16245363|)
Gm01	49277819	CAAAAAA	CAAAAA	EFF=UTR_5_PRIME(MODIFIER||||Glyma01g36860|mRNA||PAC:16245413|PAC:16245413.exon.2),UTR_5_PRIME(MODIFIER||||Glyma01g36860|mRNA||PAC:16245414|PAC:16245414.exon.2)
Gm01	49376948	GA	GAA	EFF=DOWNSTREAM(MODIFIER||||Glyma01g36990|mRNA||PAC:16245431|),DOWNSTREAM(MODIFIER||||Glyma01g36990|mRNA||PAC:16245432|),UPSTREAM(MODIFIER||||Glyma01g36980|mRNA||PAC:16245430|)
Gm01	49519463	C	A	EFF=DOWNSTREAM(MODIFIER||||Glyma01g37140|mRNA||PAC:16245446|),SYNONYMOUS_CODING(LOW|SILENT|atC/atA|I222|Glyma01g37130|mRNA||PAC:16245445|PAC:16245445.exon.3),UPSTREAM(MODIFIER||||Glyma01g37120|mRNA||PAC:16245444|)
Gm01	49522684	T	C	EFF=DOWNSTREAM(MODIFIER||||Glyma01g37130|mRNA||PAC:16245445|),NON_SYNONYMOUS_CODING(MODERATE|MISSENSE|cAg/cGg|Q3447R|Glyma01g37140|mRNA||PAC:16245446|PAC:16245446.exon.32)
Gm01	49529956	TGAGAGA	TGAGA	EFF=INTRON(MODIFIER||||Glyma01g37140|mRNA||PAC:16245446|)
Gm01	49536009	G	A	EFF=SYNONYMOUS_CODING(LOW|SILENT|acC/acT|T1299|Glyma01g37140|mRNA||PAC:16245446|PAC:16245446.exon.14)
Gm01	49537068	A	G	EFF=SYNONYMOUS_CODING(LOW|SILENT|aaT/aaC|N976|Glyma01g37140|mRNA||PAC:16245446|PAC:16245446.exon.13)
Gm01	49541870	C	T	EFF=INTRON(MODIFIER||||Glyma01g37140|mRNA||PAC:16245446|)
Gm01	49626518	G	T	EFF=DOWNSTREAM(MODIFIER||||Glyma01g37250|mRNA||PAC:16245458|)
Gm01	49687691	C	T	EFF=DOWNSTREAM(MODIFIER||||Glyma01g37330|mRNA||PAC:16245468|)
Gm01	49691463	ACCC	ACC	EFF=FRAME_SHIFT(HIGH||||Glyma01g37330|mRNA||PAC:16245468|PAC:16245468.exon.1)
Gm01	49741088	G	A	EFF=INTRON(MODIFIER||||Glyma01g37380|mRNA||PAC:16245473|)
Gm01	49741125	C	A	EFF=INTRON(MODIFIER||||Glyma01g37380|mRNA||PAC:16245473|)
Gm01	49760030	T	C	EFF=INTRON(MODIFIER||||Glyma01g37400|mRNA||PAC:16245475|)
Gm01	49775241	C	T	EFF=SYNONYMOUS_CODING(LOW|SILENT|agC/agT|S387|Glyma01g37420|mRNA||PAC:16245477|PAC:16245477.exon.6)
Gm01	50077045	G	T	EFF=UPSTREAM(MODIFIER||||Glyma01g37790|mRNA||PAC:16245523|)
Gm01	50195753	A	C	EFF=INTERGENIC(MODIFIER||||||||)
Gm01	50222897	T	A	EFF=DOWNSTREAM(MODIFIER||||Glyma01g37980|mRNA||PAC:16245543|),INTRAGENIC(MODIFIER||||Glyma01g37990|mRNA|||)
Gm01	50222910	C	T	EFF=DOWNSTREAM(MODIFIER||||Glyma01g37980|mRNA||PAC:16245543|),INTRAGENIC(MODIFIER||||Glyma01g37990|mRNA|||)
Gm01	50262192	G	A	EFF=DOWNSTREAM(MODIFIER||||Glyma01g38070|mRNA||PAC:16245552|),SYNONYMOUS_CODING(LOW|SILENT|gtG/gtA|V207|Glyma01g38090|mRNA||PAC:16245554|PAC:16245554.exon.2)
Gm01	50281680	G	A	EFF=UTR_3_PRIME(MODIFIER||||Glyma01g38120|mRNA||PAC:16245557|PAC:16245557.exon.10)
Gm01	50522744	C	T	EFF=NON_SYNONYMOUS_CODING(MODERATE|MISSENSE|Ctt/Ttt|L8F|Glyma01g38400|mRNA||PAC:16245597|PAC:16245597.exon.1)
Gm01	50522881	A	G	EFF=SYNONYMOUS_CODING(LOW|SILENT|gaA/gaG|E53|Glyma01g38400|mRNA||PAC:16245597|PAC:16245597.exon.1)
Gm01	50586859	T	G	EFF=DOWNSTREAM(MODIFIER||||Glyma01g38500|mRNA||PAC:16245612|),UTR_3_PRIME(MODIFIER||||Glyma01g38510|mRNA||PAC:16245613|PAC:16245613.exon.2)
Gm01	50586907	A	G	EFF=DOWNSTREAM(MODIFIER||||Glyma01g38500|mRNA||PAC:16245612|),UTR_3_PRIME(MODIFIER||||Glyma01g38510|mRNA||PAC:16245613|PAC:16245613.exon.2)
Gm01	50631014	G	A	EFF=NON_SYNONYMOUS_CODING(MODERATE|MISSENSE|gCc/gTc|A569V|Glyma01g38570|mRNA||PAC:16245619|PAC:16245619.exon.4),UPSTREAM(MODIFIER||||Glyma01g38560|mRNA||PAC:16245618|),UPSTREAM(MODIFIER||||Glyma01g38580|mRNA||PAC:16245620|)
Gm01	50631036	A	G	EFF=NON_SYNONYMOUS_CODING(MODERATE|MISSENSE|Tca/Cca|S562P|Glyma01g38570|mRNA||PAC:16245619|PAC:16245619.exon.4),UPSTREAM(MODIFIER||||Glyma01g38560|mRNA||PAC:16245618|),UPSTREAM(MODIFIER||||Glyma01g38580|mRNA||PAC:16245620|)
Gm01	50634295	C	G	EFF=INTRON(MODIFIER||||Glyma01g38580|mRNA||PAC:16245620|),UPSTREAM(MODIFIER||||Glyma01g38570|mRNA||PAC:16245619|)
Gm01	50704336	T	G	EFF=INTERGENIC(MODIFIER||||||||)
Gm01	50743061	C	T	EFF=DOWNSTREAM(MODIFIER||||Glyma01g38670|mRNA||PAC:16245632|)
Gm01	50748039	AC	A	EFF=INTRON(MODIFIER||||Glyma01g38670|mRNA||PAC:16245632|)
Gm01	50750717	G	A	EFF=SYNONYMOUS_CODING(LOW|SILENT|tcC/tcT|S659|Glyma01g38670|mRNA||PAC:16245632|PAC:16245632.exon.8)
Gm01	50754588	T	C	EFF=NON_SYNONYMOUS_CODING(MODERATE|MISSENSE|Aat/Gat|N118D|Glyma01g38670|mRNA||PAC:16245632|PAC:16245632.exon.4)
Gm01	50776917	T	C	EFF=DOWNSTREAM(MODIFIER||||Glyma01g38680|mRNA||PAC:16245633|),DOWNSTREAM(MODIFIER||||Glyma01g38690|mRNA||PAC:16245634|)
Gm01	50800241	A	G	EFF=DOWNSTREAM(MODIFIER||||Glyma01g38730|mRNA||PAC:16245638|),SYNONYMOUS_CODING(LOW|SILENT|acT/acC|T103|Glyma01g38720|mRNA||PAC:16245637|PAC:16245637.exon.1)
Gm01	50824084	C	T	EFF=NON_SYNONYMOUS_CODING(MODERATE|MISSENSE|Gca/Aca|A418T|Glyma01g38780|mRNA||PAC:16245644|PAC:16245644.exon.6)
Gm01	50863303	A	G	EFF=DOWNSTREAM(MODIFIER||||Glyma01g38860|mRNA||PAC:16245652|),UPSTREAM(MODIFIER||||Glyma01g38870|mRNA||PAC:16245653|)
Gm01	50879782	G	C	EFF=SYNONYMOUS_CODING(LOW|SILENT|gcG/gcC|A122|Glyma01g38880|mRNA||PAC:16245654|PAC:16245654.exon.1)
Gm01	50879881	A	C	EFF=NON_SYNONYMOUS_CODING(MODERATE|MISSENSE|gaA/gaC|E155D|Glyma01g38880|mRNA||PAC:16245654|PAC:16245654.exon.1)
Gm01	50897987	T	A	EFF=SYNONYMOUS_CODING(LOW|SILENT|gtA/gtT|V135|Glyma01g38900|mRNA||PAC:16245656|PAC:16245656.exon.1)
Gm01	50911447	G	T	EFF=UPSTREAM(MODIFIER||||Glyma01g38910|mRNA||PAC:16245657|),UPSTREAM(MODIFIER||||Glyma01g38920|mRNA||PAC:16245658|),UPSTREAM(MODIFIER||||Glyma01g38920|mRNA||PAC:16245659|)
Gm01	50911631	A	G	EFF=UPSTREAM(MODIFIER||||Glyma01g38910|mRNA||PAC:16245657|),UPSTREAM(MODIFIER||||Glyma01g38920|mRNA||PAC:16245658|),UPSTREAM(MODIFIER||||Glyma01g38920|mRNA||PAC:16245659|)
Gm01	50911728	C	A	EFF=UPSTREAM(MODIFIER||||Glyma01g38910|mRNA||PAC:16245657|),UPSTREAM(MODIFIER||||Glyma01g38920|mRNA||PAC:16245658|),UPSTREAM(MODIFIER||||Glyma01g38920|mRNA||PAC:16245659|)
Gm01	51034440	T	C	EFF=NON_SYNONYMOUS_CODING(MODERATE|MISSENSE|Agg/Ggg|R201G|Glyma01g39060|mRNA||PAC:16245676|PAC:16245676.exon.2),NON_SYNONYMOUS_CODING(MODERATE|MISSENSE|Agg/Ggg|R201G|Glyma01g39060|mRNA||PAC:16245677|PAC:16245677.exon.1)
Gm01	51058638	G	T	EFF=INTRON(MODIFIER||||Glyma01g39070|mRNA||PAC:16245678|)
Gm01	51088635	T	A	EFF=INTRON(MODIFIER||||Glyma01g39110|mRNA||PAC:16245682|)
Gm01	51103413	T	C	EFF=DOWNSTREAM(MODIFIER||||Glyma01g39120|mRNA||PAC:16245683|),NON_SYNONYMOUS_CODING(MODERATE|MISSENSE|gTt/gCt|V1318A|Glyma01g39110|mRNA||PAC:16245682|PAC:16245682.exon.23)
Gm01	51234853	G	A	EFF=INTRON(MODIFIER||||Glyma01g39270|mRNA||PAC:16245698|)
Gm01	51358252	C	A	EFF=DOWNSTREAM(MODIFIER||||Glyma01g39410|mRNA||PAC:16245712|),UPSTREAM(MODIFIER||||Glyma01g39420|mRNA||PAC:16245713|),UPSTREAM(MODIFIER||||Glyma01g39430|mRNA||PAC:16245714|)
Gm01	51368929	G	A	EFF=INTRON(MODIFIER||||Glyma01g39430|mRNA||PAC:16245714|)
Gm01	51375127	T	C	EFF=DOWNSTREAM(MODIFIER||||Glyma01g39440|mRNA||PAC:16245715|),NON_SYNONYMOUS_CODING(MODERATE|MISSENSE|gTa/gCa|V1272A|Glyma01g39430|mRNA||PAC:16245714|PAC:16245714.exon.28)
Gm01	51388139	G	A	EFF=SYNONYMOUS_CODING(LOW|SILENT|gcC/gcT|A81|Glyma01g39450|mRNA||PAC:16245716|PAC:16245716.exon.1),UPSTREAM(MODIFIER||||Glyma01g39440|mRNA||PAC:16245715|)
Gm01	51422368	C	A	EFF=INTRON(MODIFIER||||Glyma01g39490|mRNA||PAC:16245720|)
Gm01	51435923	G	T	EFF=DOWNSTREAM(MODIFIER||||Glyma01g39500|mRNA||PAC:16245721|),NON_SYNONYMOUS_CODING(MODERATE|MISSENSE|aCg/aAg|T397K|Glyma01g39510|mRNA||PAC:16245722|PAC:16245722.exon.4)
Gm01	51451403	C	G	EFF=INTERGENIC(MODIFIER||||||||)
Gm01	51572973	T	A	EFF=DOWNSTREAM(MODIFIER||||Glyma01g39660|mRNA||PAC:16245740|),NON_SYNONYMOUS_CODING(MODERATE|MISSENSE|Tcg/Acg|S524T|Glyma01g39650|mRNA||PAC:16245739|PAC:16245739.exon.13)
Gm01	51629843	C	A	EFF=DOWNSTREAM(MODIFIER||||Glyma01g39750|mRNA||PAC:16245748|),DOWNSTREAM(MODIFIER||||Glyma01g39750|mRNA||PAC:16245749|),UPSTREAM(MODIFIER||||Glyma01g39760|mRNA||PAC:16245750|),UPSTREAM(MODIFIER||||Glyma01g39770|mRNA||PAC:16245751|)
Gm01	51629882	G	A	EFF=DOWNSTREAM(MODIFIER||||Glyma01g39750|mRNA||PAC:16245748|),DOWNSTREAM(MODIFIER||||Glyma01g39750|mRNA||PAC:16245749|),UPSTREAM(MODIFIER||||Glyma01g39760|mRNA||PAC:16245750|),UPSTREAM(MODIFIER||||Glyma01g39770|mRNA||PAC:16245751|)
Gm01	51635149	G	T	EFF=DOWNSTREAM(MODIFIER||||Glyma01g39770|mRNA||PAC:16245751|)
Gm01	51669837	T	C	EFF=SYNONYMOUS_CODING(LOW|SILENT|acA/acG|T82|Glyma01g39810|mRNA||PAC:16245755|PAC:16245755.exon.1)
Gm01	51680491	C	T	EFF=SYNONYMOUS_CODING(LOW|SILENT|gcG/gcA|A1013|Glyma01g39830|mRNA||PAC:16245757|PAC:16245757.exon.24),SYNONYMOUS_CODING(LOW|SILENT|gcG/gcA|A1013|Glyma01g39830|mRNA||PAC:16245758|PAC:16245758.exon.24)
Gm01	51715797	C	T	EFF=NON_SYNONYMOUS_CODING(MODERATE|MISSENSE|cGa/cAa|R102Q|Glyma01g39870|mRNA||PAC:16245761|PAC:16245761.exon.1)
Gm01	51745195	A	G	EFF=SYNONYMOUS_CODING(LOW|SILENT|atT/atC|I206|Glyma01g39910|mRNA||PAC:16245765|PAC:16245765.exon.4)
Gm01	51764870	C	T	EFF=DOWNSTREAM(MODIFIER||||Glyma01g39960|mRNA||PAC:16245771|),START_GAINED(LOW||||Glyma01g39950|mRNA||PAC:16245770|PAC:16245770.exon.1)
Gm01	51791597	G	C	EFF=UPSTREAM(MODIFIER||||Glyma01g39990|mRNA||PAC:16245774|)
Gm01	51791619	A	G	EFF=UPSTREAM(MODIFIER||||Glyma01g39990|mRNA||PAC:16245774|)
Gm01	51954424	G	T	EFF=DOWNSTREAM(MODIFIER||||Glyma01g40160|mRNA||PAC:16245792|),UPSTREAM(MODIFIER||||Glyma01g40170|mRNA||PAC:16245793|)
Gm01	52401924	A	C	EFF=INTRON(MODIFIER||||Glyma01g40690|mRNA||PAC:16245852|)
Gm01	52447775	A	T	EFF=DOWNSTREAM(MODIFIER||||Glyma01g40770|mRNA||PAC:16245860|),SYNONYMOUS_CODING(LOW|SILENT|acT/acA|T598|Glyma01g40780|mRNA||PAC:16245861|PAC:16245861.exon.5)
Gm01	52447944	T	C	EFF=DOWNSTREAM(MODIFIER||||Glyma01g40770|mRNA||PAC:16245860|),INTRON(MODIFIER||||Glyma01g40780|mRNA||PAC:16245861|)
Gm01	52448073	A	G	EFF=DOWNSTREAM(MODIFIER||||Glyma01g40770|mRNA||PAC:16245860|),INTRON(MODIFIER||||Glyma01g40780|mRNA||PAC:16245861|)
Gm01	52503606	T	C	EFF=DOWNSTREAM(MODIFIER||||Glyma01g40860|mRNA||PAC:16245870|),SYNONYMOUS_CODING(LOW|SILENT|ccT/ccC|P257|Glyma01g40850|mRNA||PAC:16245869|PAC:16245869.exon.4)
Gm01	52546469	A	C	EFF=SYNONYMOUS_CODING(LOW|SILENT|ctT/ctG|L128|Glyma01g40890|mRNA||PAC:16245874|PAC:16245874.exon.4)
Gm01	52603513	T	C	EFF=DOWNSTREAM(MODIFIER||||Glyma01g40970|mRNA||PAC:16245883|),UPSTREAM(MODIFIER||||Glyma01g40980|mRNA||PAC:16245884|),UPSTREAM(MODIFIER||||Glyma01g41010|mRNA||PAC:16245887|),UPSTREAM(MODIFIER||||Glyma01g41010|mRNA||PAC:16245888|)
Gm01	52603529	A	G	EFF=DOWNSTREAM(MODIFIER||||Glyma01g40970|mRNA||PAC:16245883|),UPSTREAM(MODIFIER||||Glyma01g40980|mRNA||PAC:16245884|),UPSTREAM(MODIFIER||||Glyma01g41010|mRNA||PAC:16245887|),UPSTREAM(MODIFIER||||Glyma01g41010|mRNA||PAC:16245888|)
Gm01	52792417	C	T	EFF=DOWNSTREAM(MODIFIER||||Glyma01g41230|mRNA||PAC:16245912|),DOWNSTREAM(MODIFIER||||Glyma01g41230|mRNA||PAC:16245913|),NON_SYNONYMOUS_CODING(MODERATE|MISSENSE|Cgg/Tgg|R84W|Glyma01g41210|mRNA||PAC:16245910|PAC:16245910.exon.5),UPSTREAM(MODIFIER||||Glyma01g41220|mRNA||PAC:16245911|)
Gm01	53580857	G	T	EFF=DOWNSTREAM(MODIFIER||||Glyma01g42280|mRNA||PAC:16246039|),INTRON(MODIFIER||||Glyma01g42290|mRNA||PAC:16246040|)
Gm01	53590059	C	T	EFF=INTRON(MODIFIER||||Glyma01g42300|mRNA||PAC:16246041|)
Gm01	53597652	G	A	EFF=SYNONYMOUS_CODING(LOW|SILENT|ccG/ccA|P489|Glyma01g42310|mRNA||PAC:16246042|PAC:16246042.exon.1),UPSTREAM(MODIFIER||||Glyma01g42320|mRNA||PAC:16246043|)
Gm01	53602988	T	A	EFF=DOWNSTREAM(MODIFIER||||Glyma01g42310|mRNA||PAC:16246042|),DOWNSTREAM(MODIFIER||||Glyma01g42330|mRNA||PAC:16246044|),NON_SYNONYMOUS_CODING(MODERATE|MISSENSE|ttT/ttA|F219L|Glyma01g42320|mRNA||PAC:16246043|PAC:16246043.exon.3)
Gm01	53602990	T	C	EFF=DOWNSTREAM(MODIFIER||||Glyma01g42310|mRNA||PAC:16246042|),DOWNSTREAM(MODIFIER||||Glyma01g42330|mRNA||PAC:16246044|),NON_SYNONYMOUS_CODING(MODERATE|MISSENSE|gTa/gCa|V220A|Glyma01g42320|mRNA||PAC:16246043|PAC:16246043.exon.3)
Gm01	53603077	A	G	EFF=DOWNSTREAM(MODIFIER||||Glyma01g42310|mRNA||PAC:16246042|),DOWNSTREAM(MODIFIER||||Glyma01g42330|mRNA||PAC:16246044|),NON_SYNONYMOUS_CODING(MODERATE|MISSENSE|cAt/cGt|H249R|Glyma01g42320|mRNA||PAC:16246043|PAC:16246043.exon.3)
Gm01	53724615	G	T	EFF=INTRAGENIC(MODIFIER||||Glyma01g42480|mRNA|||)
Gm01	53877753	A	T	EFF=DOWNSTREAM(MODIFIER||||Glyma01g42660|mRNA||PAC:16246085|),SYNONYMOUS_CODING(LOW|SILENT|ggA/ggT|G159|Glyma01g42670|mRNA||PAC:16246086|PAC:16246086.exon.1)
Gm01	53889335	GTTTTTT	GTTTTTTT	EFF=INTRON(MODIFIER||||Glyma01g42680|mRNA||PAC:16246088|),UTR_5_PRIME(MODIFIER||||Glyma01g42680|mRNA||PAC:16246087|PAC:16246087.exon.1)
Gm01	53891364	G	A	EFF=SYNONYMOUS_CODING(LOW|SILENT|ccG/ccA|P169|Glyma01g42680|mRNA||PAC:16246087|PAC:16246087.exon.4),SYNONYMOUS_CODING(LOW|SILENT|ccG/ccA|P169|Glyma01g42680|mRNA||PAC:16246088|PAC:16246088.exon.5)
Gm01	53931871	GTTTTTTTTTT	GTTTTTTTTT	EFF=INTRON(MODIFIER||||Glyma01g42730|mRNA||PAC:16246093|),INTRON(MODIFIER||||Glyma01g42730|mRNA||PAC:16246094|),INTRON(MODIFIER||||Glyma01g42730|mRNA||PAC:16246095|),UPSTREAM(MODIFIER||||Glyma01g42740|mRNA||PAC:16246096|)
Gm01	53931899	T	G	EFF=INTRON(MODIFIER||||Glyma01g42730|mRNA||PAC:16246093|),INTRON(MODIFIER||||Glyma01g42730|mRNA||PAC:16246094|),INTRON(MODIFIER||||Glyma01g42730|mRNA||PAC:16246095|),UPSTREAM(MODIFIER||||Glyma01g42740|mRNA||PAC:16246096|)
Gm01	53966196	C	T	EFF=DOWNSTREAM(MODIFIER||||Glyma01g42790|mRNA||PAC:16246101|)
Gm01	54030371	T	A	EFF=INTRAGENIC(MODIFIER||||Glyma01g42900|mRNA|||),UPSTREAM(MODIFIER||||Glyma01g42890|mRNA||PAC:16246113|),UPSTREAM(MODIFIER||||Glyma01g42910|mRNA||PAC:16246115|)
Gm01	54076048	A	C	EFF=DOWNSTREAM(MODIFIER||||Glyma01g42970|mRNA||PAC:16246122|),UPSTREAM(MODIFIER||||Glyma01g42960|mRNA||PAC:16246121|)
Gm01	54095598	G	A	EFF=NON_SYNONYMOUS_CODING(MODERATE|MISSENSE|cGa/cAa|R643Q|Glyma01g42980|mRNA||PAC:16246123|PAC:16246123.exon.5)
Gm01	54223193	C	T	EFF=DOWNSTREAM(MODIFIER||||Glyma01g43150|mRNA||PAC:16246141|),DOWNSTREAM(MODIFIER||||Glyma01g43170|mRNA||PAC:16246143|)
Gm01	54265907	C	T	EFF=DOWNSTREAM(MODIFIER||||Glyma01g43190|mRNA||PAC:16246145|),UPSTREAM(MODIFIER||||Glyma01g43200|mRNA||PAC:16246146|),UPSTREAM(MODIFIER||||Glyma01g43210|mRNA||PAC:16246147|)
Gm01	54313303	G	A	EFF=DOWNSTREAM(MODIFIER||||Glyma01g43250|mRNA||PAC:16246151|),DOWNSTREAM(MODIFIER||||Glyma01g43270|mRNA||PAC:16246153|),DOWNSTREAM(MODIFIER||||Glyma01g43270|mRNA||PAC:16246154|),DOWNSTREAM(MODIFIER||||Glyma01g43270|mRNA||PAC:16246155|),DOWNSTREAM(MODIFIER||||Glyma01g43270|mRNA||PAC:16246156|),SYNONYMOUS_CODING(LOW|SILENT|tgC/tgT|C309|Glyma01g43260|mRNA||PAC:16246152|PAC:16246152.exon.1)
Gm01	54321760	C	G	EFF=DOWNSTREAM(MODIFIER||||Glyma01g43280|mRNA||PAC:16246157|),NON_SYNONYMOUS_CODING(MODERATE|MISSENSE|Gct/Cct|A88P|Glyma01g43270|mRNA||PAC:16246153|PAC:16246153.exon.1),NON_SYNONYMOUS_CODING(MODERATE|MISSENSE|Gct/Cct|A88P|Glyma01g43270|mRNA||PAC:16246154|PAC:16246154.exon.1),NON_SYNONYMOUS_CODING(MODERATE|MISSENSE|Gct/Cct|A88P|Glyma01g43270|mRNA||PAC:16246155|PAC:16246155.exon.1),NON_SYNONYMOUS_C…
Gm01	54321832	A	G	EFF=DOWNSTREAM(MODIFIER||||Glyma01g43280|mRNA||PAC:16246157|),NON_SYNONYMOUS_CODING(MODERATE|MISSENSE|Tct/Cct|S64P|Glyma01g43270|mRNA||PAC:16246153|PAC:16246153.exon.1),NON_SYNONYMOUS_CODING(MODERATE|MISSENSE|Tct/Cct|S64P|Glyma01g43270|mRNA||PAC:16246154|PAC:16246154.exon.1),NON_SYNONYMOUS_CODING(MODERATE|MISSENSE|Tct/Cct|S64P|Glyma01g43270|mRNA||PAC:16246155|PAC:16246155.exon.1),NON_SYNONYMOUS_C…
Gm01	54321905	C	T	EFF=DOWNSTREAM(MODIFIER||||Glyma01g43280|mRNA||PAC:16246157|),SYNONYMOUS_CODING(LOW|SILENT|caG/caA|Q39|Glyma01g43270|mRNA||PAC:16246153|PAC:16246153.exon.1),SYNONYMOUS_CODING(LOW|SILENT|caG/caA|Q39|Glyma01g43270|mRNA||PAC:16246154|PAC:16246154.exon.1),SYNONYMOUS_CODING(LOW|SILENT|caG/caA|Q39|Glyma01g43270|mRNA||PAC:16246155|PAC:16246155.exon.1),SYNONYMOUS_CODING(LOW|SILENT|caG/caA|Q39|Glyma01g432…
Gm01	54321997	C	T	EFF=DOWNSTREAM(MODIFIER||||Glyma01g43280|mRNA||PAC:16246157|),NON_SYNONYMOUS_CODING(MODERATE|MISSENSE|Gcc/Acc|A9T|Glyma01g43270|mRNA||PAC:16246153|PAC:16246153.exon.1),NON_SYNONYMOUS_CODING(MODERATE|MISSENSE|Gcc/Acc|A9T|Glyma01g43270|mRNA||PAC:16246154|PAC:16246154.exon.1),NON_SYNONYMOUS_CODING(MODERATE|MISSENSE|Gcc/Acc|A9T|Glyma01g43270|mRNA||PAC:16246155|PAC:16246155.exon.1),NON_SYNONYMOUS_CODI…
Gm01	54338088	C	T	EFF=SYNONYMOUS_CODING(LOW|SILENT|gcC/gcT|A55|Glyma01g43290|mRNA||PAC:16246158|PAC:16246158.exon.1),UPSTREAM(MODIFIER||||Glyma01g43300|mRNA||PAC:16246159|)
Gm01	54361157	C	T	EFF=DOWNSTREAM(MODIFIER||||Glyma01g43330|mRNA||PAC:16246162|),UPSTREAM(MODIFIER||||Glyma01g43340|mRNA||PAC:16246163|)
Gm01	54551628	T	C	EFF=DOWNSTREAM(MODIFIER||||Glyma01g43550|mRNA||PAC:16246191|),DOWNSTREAM(MODIFIER||||Glyma01g43570|mRNA||PAC:16246194|),DOWNSTREAM(MODIFIER||||Glyma01g43580|mRNA||PAC:16246195|),SYNONYMOUS_CODING(LOW|SILENT|gaT/gaC|D235|Glyma01g43560|mRNA||PAC:16246192|PAC:16246192.exon.3),SYNONYMOUS_CODING(LOW|SILENT|gaT/gaC|D235|Glyma01g43560|mRNA||PAC:16246193|PAC:16246193.exon.2)
Gm01	54565676	G	A	EFF=UPSTREAM(MODIFIER||||Glyma01g43600|mRNA||PAC:16246197|)
Gm01	54589491	G	A	EFF=UTR_5_PRIME(MODIFIER||||Glyma01g43630|mRNA||PAC:16246200|PAC:16246200.exon.1)
Gm01	54618337	GAAAAAAAAA	GAAAAAAAAAA	EFF=INTERGENIC(MODIFIER||||||||)
Gm01	54646121	A	T	EFF=NON_SYNONYMOUS_CODING(MODERATE|MISSENSE|gaT/gaA|D19E|Glyma01g43690|mRNA||PAC:16246206|PAC:16246206.exon.3)
Gm01	54879322	C	T	EFF=SYNONYMOUS_CODING(LOW|SILENT|ccG/ccA|P391|Glyma01g44090|mRNA||PAC:16246251|PAC:16246251.exon.6),UPSTREAM(MODIFIER||||Glyma01g44080|mRNA||PAC:16246250|)
Gm01	54904653	G	A	EFF=UPSTREAM(MODIFIER||||Glyma01g44130|mRNA||PAC:16246255|)
Gm01	54943114	T	C	EFF=DOWNSTREAM(MODIFIER||||Glyma01g44210|mRNA||PAC:16246264|),SYNONYMOUS_CODING(LOW|SILENT|Tta/Cta|L141|Glyma01g44200|mRNA||PAC:16246262|PAC:16246262.exon.5),SYNONYMOUS_CODING(LOW|SILENT|Tta/Cta|L141|Glyma01g44200|mRNA||PAC:16246263|PAC:16246263.exon.5)
Gm01	54949893	T	C	EFF=DOWNSTREAM(MODIFIER||||Glyma01g44200|mRNA||PAC:16246262|),DOWNSTREAM(MODIFIER||||Glyma01g44200|mRNA||PAC:16246263|),NON_SYNONYMOUS_CODING(MODERATE|MISSENSE|Aaa/Gaa|K58E|Glyma01g44210|mRNA||PAC:16246264|PAC:16246264.exon.1),UPSTREAM(MODIFIER||||Glyma01g44220|mRNA||PAC:16246265|)
Gm01	54962511	G	T	EFF=DOWNSTREAM(MODIFIER||||Glyma01g44230|mRNA||PAC:16246266|),DOWNSTREAM(MODIFIER||||Glyma01g44250|mRNA||PAC:16246268|),SYNONYMOUS_CODING(LOW|SILENT|Cga/Aga|R30|Glyma01g44240|mRNA||PAC:16246267|PAC:16246267.exon.1)
Gm01	55025192	T	G	EFF=DOWNSTREAM(MODIFIER||||Glyma01g44330|mRNA||PAC:16246280|)
Gm01	55109466	A	C	EFF=SYNONYMOUS_CODING(LOW|SILENT|Agg/Cgg|R577|Glyma01g44440|mRNA||PAC:16246294|PAC:16246294.exon.1)
Gm01	55321119	T	G	EFF=DOWNSTREAM(MODIFIER||||Glyma01g44780|mRNA||PAC:16246341|),SYNONYMOUS_CODING(LOW|SILENT|ccA/ccC|P4|Glyma01g44790|mRNA||PAC:16246342|PAC:16246342.exon.2)
Gm01	55375441	TGGG	TG	EFF=DOWNSTREAM(MODIFIER||||Glyma01g44900|mRNA||PAC:16246353|),DOWNSTREAM(MODIFIER||||Glyma01g44900|mRNA||PAC:16246354|),DOWNSTREAM(MODIFIER||||Glyma01g44900|mRNA||PAC:16246355|),DOWNSTREAM(MODIFIER||||Glyma01g44910|mRNA||PAC:16246356|)
Gm01	55492204	T	C	EFF=SYNONYMOUS_CODING(LOW|SILENT|caA/caG|Q220|Glyma01g45070|mRNA||PAC:16246372|PAC:16246372.exon.4)
Gm01	55545541	T	TC	EFF=DOWNSTREAM(MODIFIER||||Glyma01g45170|mRNA||PAC:16246385|),INTRON(MODIFIER||||Glyma01g45170|mRNA||PAC:16246382|),INTRON(MODIFIER||||Glyma01g45170|mRNA||PAC:16246383|),INTRON(MODIFIER||||Glyma01g45170|mRNA||PAC:16246384|)
Gm01	55581083	A	G	EFF=NON_SYNONYMOUS_CODING(MODERATE|MISSENSE|Act/Gct|T574A|Glyma01g45220|mRNA||PAC:16246390|PAC:16246390.exon.11)
Gm01	55592896	G	A	EFF=SYNONYMOUS_CODING(LOW|SILENT|ccG/ccA|P1426|Glyma01g45220|mRNA||PAC:16246390|PAC:16246390.exon.33)
Gm01	55687272	A	G	EFF=UPSTREAM(MODIFIER||||Glyma01g45370|mRNA||PAC:16246409|),UPSTREAM(MODIFIER||||Glyma01g45380|mRNA||PAC:16246410|)
Gm01	55687274	A	C	EFF=UPSTREAM(MODIFIER||||Glyma01g45370|mRNA||PAC:16246409|),UPSTREAM(MODIFIER||||Glyma01g45380|mRNA||PAC:16246410|)
Gm01	55722752	A	T	EFF=DOWNSTREAM(MODIFIER||||Glyma01g45440|mRNA||PAC:16246420|),INTRON(MODIFIER||||Glyma01g45470|mRNA||PAC:16246423|)
Gm01	55732158	G	T	EFF=INTRON(MODIFIER||||Glyma01g45490|mRNA||PAC:16246425|),UPSTREAM(MODIFIER||||Glyma01g45470|mRNA||PAC:16246423|)
Gm01	55753861	G	C	EFF=DOWNSTREAM(MODIFIER||||Glyma01g45510|mRNA||PAC:16246427|),SYNONYMOUS_CODING(LOW|SILENT|gcG/gcC|A36|Glyma01g45530|mRNA||PAC:16246429|PAC:16246429.exon.1),UPSTREAM(MODIFIER||||Glyma01g45520|mRNA||PAC:16246428|),UPSTREAM(MODIFIER||||Glyma01g45540|mRNA||PAC:16246430|)
Gm01	55815694	C	T	EFF=INTRON(MODIFIER||||Glyma01g45650|mRNA||PAC:16246438|)
Gm01	55840610	A	G	EFF=INTRON(MODIFIER||||Glyma01g45670|mRNA||PAC:16246441|)
Gm01	55845714	T	A	EFF=INTRON(MODIFIER||||Glyma01g45670|mRNA||PAC:16246441|)
Gm01	55864234	T	C	EFF=DOWNSTREAM(MODIFIER||||Glyma01g45700|mRNA||PAC:16246444|),SYNONYMOUS_CODING(LOW|SILENT|ctA/ctG|L284|Glyma01g45690|mRNA||PAC:16246443|PAC:16246443.exon.1)
Gm01	55896294	C	T	EFF=DOWNSTREAM(MODIFIER||||Glyma01g45740|mRNA||PAC:16246446|),DOWNSTREAM(MODIFIER||||Glyma01g45740|mRNA||PAC:16246447|)
Gm01	55896306	G	C	EFF=DOWNSTREAM(MODIFIER||||Glyma01g45740|mRNA||PAC:16246446|),DOWNSTREAM(MODIFIER||||Glyma01g45740|mRNA||PAC:16246447|)
Gm01	55896706	A	G	EFF=DOWNSTREAM(MODIFIER||||Glyma01g45740|mRNA||PAC:16246446|),DOWNSTREAM(MODIFIER||||Glyma01g45740|mRNA||PAC:16246447|)
Gm02	157842	A	G	EFF=DOWNSTREAM(MODIFIER||||Glyma02g00360|mRNA||PAC:16246486|),INTRON(MODIFIER||||Glyma02g00370|mRNA||PAC:16246487|)
Gm02	267028	G	T	EFF=UPSTREAM(MODIFIER||||Glyma02g00490|mRNA||PAC:16246499|),UPSTREAM(MODIFIER||||Glyma02g00490|mRNA||PAC:16246500|)
Gm02	309954	T	C	EFF=INTERGENIC(MODIFIER||||||||)
Gm02	309985	T	C	EFF=INTERGENIC(MODIFIER||||||||)
Gm02	354479	G	A	EFF=UPSTREAM(MODIFIER||||Glyma02g00570|mRNA||PAC:16246508|),UPSTREAM(MODIFIER||||Glyma02g00580|mRNA||PAC:16246509|),UPSTREAM(MODIFIER||||Glyma02g00580|mRNA||PAC:16246510|)
Gm02	359714	C	T	EFF=INTRON(MODIFIER||||Glyma02g00580|mRNA||PAC:16246509|),INTRON(MODIFIER||||Glyma02g00580|mRNA||PAC:16246510|)
Gm02	463147	C	A	EFF=INTRON(MODIFIER||||Glyma02g00670|mRNA||PAC:16246519|),UPSTREAM(MODIFIER||||Glyma02g00680|mRNA||PAC:16246520|)
Gm02	688246	C	G	EFF=DOWNSTREAM(MODIFIER||||Glyma02g00910|mRNA||PAC:16246546|),NON_SYNONYMOUS_CODING(MODERATE|MISSENSE|tGg/tCg|W48S|Glyma02g00890|mRNA||PAC:16246544|PAC:16246544.exon.1)
Gm02	688280	T	A	EFF=DOWNSTREAM(MODIFIER||||Glyma02g00910|mRNA||PAC:16246546|),NON_SYNONYMOUS_CODING(MODERATE|MISSENSE|Att/Ttt|I37F|Glyma02g00890|mRNA||PAC:16246544|PAC:16246544.exon.1)
Gm02	827376	G	T	EFF=SYNONYMOUS_CODING(LOW|SILENT|gcC/gcA|A223|Glyma02g01100|mRNA||PAC:16246567|PAC:16246567.exon.5),UPSTREAM(MODIFIER||||Glyma02g01110|mRNA||PAC:16246568|)
Gm02	827545	A	G	EFF=INTRON(MODIFIER||||Glyma02g01100|mRNA||PAC:16246567|),UPSTREAM(MODIFIER||||Glyma02g01110|mRNA||PAC:16246568|)
Gm02	827549	T	C	EFF=INTRON(MODIFIER||||Glyma02g01100|mRNA||PAC:16246567|),UPSTREAM(MODIFIER||||Glyma02g01110|mRNA||PAC:16246568|)
Gm02	858433	G	A	EFF=SYNONYMOUS_CODING(LOW|SILENT|agC/agT|S203|Glyma02g01150|mRNA||PAC:16246572|PAC:16246572.exon.5),SYNONYMOUS_CODING(LOW|SILENT|agC/agT|S203|Glyma02g01150|mRNA||PAC:16246573|PAC:16246573.exon.5),UPSTREAM(MODIFIER||||Glyma02g01140|mRNA||PAC:16246571|)
Gm02	1073141	G	A	EFF=DOWNSTREAM(MODIFIER||||Glyma02g01480|mRNA||PAC:16246617|),UPSTREAM(MODIFIER||||Glyma02g01490|mRNA||PAC:16246618|)
Gm02	1339338	G	A	EFF=UPSTREAM(MODIFIER||||Glyma02g01880|mRNA||PAC:16246660|)
Gm02	1339358	T	A	EFF=UPSTREAM(MODIFIER||||Glyma02g01880|mRNA||PAC:16246660|)
Gm02	1339413	GAAA	GAAAA	EFF=UPSTREAM(MODIFIER||||Glyma02g01880|mRNA||PAC:16246660|)
Gm02	1373547	G	A	EFF=SYNONYMOUS_CODING(LOW|SILENT|agG/agA|R337|Glyma02g01900|mRNA||PAC:16246662|PAC:16246662.exon.10)
Gm02	1434312	A	T	EFF=UPSTREAM(MODIFIER||||Glyma02g01960|mRNA||PAC:16246669|),UPSTREAM(MODIFIER||||Glyma02g01970|mRNA||PAC:16246670|)
Gm02	1483919	T	A	EFF=UPSTREAM(MODIFIER||||Glyma02g02050|mRNA||PAC:16246678|)
Gm02	1541668	G	T	EFF=UPSTREAM(MODIFIER||||Glyma02g02140|mRNA||PAC:16246687|),UPSTREAM(MODIFIER||||Glyma02g02160|mRNA||PAC:16246689|)
Gm02	1554041	G	A	EFF=INTRON(MODIFIER||||Glyma02g02170|mRNA||PAC:16246690|)
Gm02	1939210	A	T	EFF=DOWNSTREAM(MODIFIER||||Glyma02g02600|mRNA||PAC:16246749|),DOWNSTREAM(MODIFIER||||Glyma02g02600|mRNA||PAC:16246753|),DOWNSTREAM(MODIFIER||||Glyma02g02600|mRNA||PAC:16246754|),DOWNSTREAM(MODIFIER||||Glyma02g02620|mRNA||PAC:16246756|),UPSTREAM(MODIFIER||||Glyma02g02610|mRNA||PAC:16246755|)
Gm02	2118802	G	A	EFF=DOWNSTREAM(MODIFIER||||Glyma02g02820|mRNA||PAC:16246775|),INTRAGENIC(MODIFIER||||Glyma02g02810|mRNA|||)
Gm02	2182200	T	C	EFF=NON_SYNONYMOUS_CODING(MODERATE|MISSENSE|Aaa/Gaa|K133E|Glyma02g02900|mRNA||PAC:16246783|PAC:16246783.exon.1)
Gm02	2329738	G	A	EFF=DOWNSTREAM(MODIFIER||||Glyma02g03030|mRNA||PAC:16246799|)
Gm02	2389514	C	G	EFF=DOWNSTREAM(MODIFIER||||Glyma02g03070|mRNA||PAC:16246803|),UPSTREAM(MODIFIER||||Glyma02g03080|mRNA||PAC:16246804|)
Gm02	2393162	G	A	EFF=INTRON(MODIFIER||||Glyma02g03080|mRNA||PAC:16246804|)
Gm02	2423283	C	T	EFF=DOWNSTREAM(MODIFIER||||Glyma02g03110|mRNA||PAC:16246807|),NON_SYNONYMOUS_CODING(MODERATE|MISSENSE|Gtg/Atg|V741M|Glyma02g03120|mRNA||PAC:16246808|PAC:16246808.exon.2)
Gm02	2443178	A	G	EFF=UPSTREAM(MODIFIER||||Glyma02g03140|mRNA||PAC:16246810|),UPSTREAM(MODIFIER||||Glyma02g03150|mRNA||PAC:16246811|)
Gm02	2520255	T	A	EFF=NON_SYNONYMOUS_CODING(MODERATE|MISSENSE|cTt/cAt|L380H|Glyma02g03250|mRNA||PAC:16246821|PAC:16246821.exon.1)
Gm02	2520273	A	C	EFF=NON_SYNONYMOUS_CODING(MODERATE|MISSENSE|gAt/gCt|D386A|Glyma02g03250|mRNA||PAC:16246821|PAC:16246821.exon.1)
Gm02	2520277	A	G	EFF=SYNONYMOUS_STOP(LOW|SILENT|taA/taG|*387|Glyma02g03250|mRNA||PAC:16246821|PAC:16246821.exon.1)
Gm02	2522396	G	C	EFF=DOWNSTREAM(MODIFIER||||Glyma02g03250|mRNA||PAC:16246821|),DOWNSTREAM(MODIFIER||||Glyma02g03270|mRNA||PAC:16246823|)
Gm02	2623365	G	A	EFF=INTERGENIC(MODIFIER||||||||)
Gm02	2623403	C	T	EFF=INTERGENIC(MODIFIER||||||||)
Gm02	2911108	T	G	EFF=INTERGENIC(MODIFIER||||||||)
Gm02	2990176	G	T	EFF=INTRON(MODIFIER||||Glyma02g03750|mRNA||PAC:16246877|)
Gm02	2990195	A	G	EFF=INTRON(MODIFIER||||Glyma02g03750|mRNA||PAC:16246877|)
Gm02	2992523	C	G	EFF=SYNONYMOUS_CODING(LOW|SILENT|tcG/tcC|S72|Glyma02g03750|mRNA||PAC:16246877|PAC:16246877.exon.1)
Gm02	3069688	GC	GCC	EFF=INTRON(MODIFIER||||Glyma02g03830|mRNA||PAC:16246884|)
Gm02	3085189	C	T	EFF=INTERGENIC(MODIFIER||||||||)
Gm02	3090761	A	G	EFF=DOWNSTREAM(MODIFIER||||Glyma02g03860|mRNA||PAC:16246889|)
Gm02	3090804	GTTTTTTTTTTT	GTTTTTTTTTT	EFF=DOWNSTREAM(MODIFIER||||Glyma02g03860|mRNA||PAC:16246889|)
Gm02	3108456	C	A	EFF=NON_SYNONYMOUS_CODING(MODERATE|MISSENSE|Ctt/Att|L54I|Glyma02g03870|mRNA||PAC:16246890|PAC:16246890.exon.2)
Gm02	3108464	T	A	EFF=SYNONYMOUS_CODING(LOW|SILENT|gtT/gtA|V56|Glyma02g03870|mRNA||PAC:16246890|PAC:16246890.exon.2)
Gm02	3118958	A	G	EFF=DOWNSTREAM(MODIFIER||||Glyma02g03900|mRNA||PAC:16246893|),NON_SYNONYMOUS_CODING(MODERATE|MISSENSE|Aaa/Gaa|K369E|Glyma02g03890|mRNA||PAC:16246892|PAC:16246892.exon.1)
Gm02	3118974	A	T	EFF=DOWNSTREAM(MODIFIER||||Glyma02g03900|mRNA||PAC:16246893|),NON_SYNONYMOUS_CODING(MODERATE|MISSENSE|gAg/gTg|E374V|Glyma02g03890|mRNA||PAC:16246892|PAC:16246892.exon.1)
Gm02	3229745	TGA	T	EFF=DOWNSTREAM(MODIFIER||||Glyma02g04010|mRNA||PAC:16246906|),FRAME_SHIFT(HIGH||||Glyma02g04020|mRNA||PAC:16246907|PAC:16246907.exon.1)
Gm02	3242920	A	C	EFF=INTRON(MODIFIER||||Glyma02g04040|mRNA||PAC:16246909|),INTRON(MODIFIER||||Glyma02g04040|mRNA||PAC:16246910|)
Gm02	3295206	T	G	EFF=INTRON(MODIFIER||||Glyma02g04120|mRNA||PAC:16246919|),INTRON(MODIFIER||||Glyma02g04120|mRNA||PAC:16246920|)
Gm02	3337576	T	A	EFF=SYNONYMOUS_CODING(LOW|SILENT|ctT/ctA|L309|Glyma02g04150|mRNA||PAC:16246923|PAC:16246923.exon.9),SYNONYMOUS_CODING(LOW|SILENT|ctT/ctA|L309|Glyma02g04150|mRNA||PAC:16246924|PAC:16246924.exon.9)
Gm02	3337602	A	T	EFF=NON_SYNONYMOUS_CODING(MODERATE|MISSENSE|tAc/tTc|Y318F|Glyma02g04150|mRNA||PAC:16246923|PAC:16246923.exon.9),NON_SYNONYMOUS_CODING(MODERATE|MISSENSE|tAc/tTc|Y318F|Glyma02g04150|mRNA||PAC:16246924|PAC:16246924.exon.9)
Gm02	3338182	T	C	EFF=SYNONYMOUS_CODING(LOW|SILENT|ggT/ggC|G471|Glyma02g04150|mRNA||PAC:16246923|PAC:16246923.exon.10),SYNONYMOUS_CODING(LOW|SILENT|ggT/ggC|G471|Glyma02g04150|mRNA||PAC:16246924|PAC:16246924.exon.10)
Gm02	3479418	C	A	EFF=DOWNSTREAM(MODIFIER||||Glyma02g04290|mRNA||PAC:16246940|),UPSTREAM(MODIFIER||||Glyma02g04280|mRNA||PAC:16246939|),UPSTREAM(MODIFIER||||Glyma02g04300|mRNA||PAC:16246941|)
Gm02	3479436	CAAAA	CAAA	EFF=DOWNSTREAM(MODIFIER||||Glyma02g04290|mRNA||PAC:16246940|),UPSTREAM(MODIFIER||||Glyma02g04280|mRNA||PAC:16246939|),UPSTREAM(MODIFIER||||Glyma02g04300|mRNA||PAC:16246941|)
Gm02	3533193	A	T	EFF=NON_SYNONYMOUS_CODING(MODERATE|MISSENSE|Ttg/Atg|L630M|Glyma02g04360|mRNA||PAC:16246949|PAC:16246949.exon.10)
Gm02	3540043	A	C	EFF=UTR_5_PRIME(MODIFIER||||Glyma02g04360|mRNA||PAC:16246949|PAC:16246949.exon.1)
Gm02	3569413	T	C	EFF=SYNONYMOUS_CODING(LOW|SILENT|cgT/cgC|R297|Glyma02g04410|mRNA||PAC:16246954|PAC:16246954.exon.6),UPSTREAM(MODIFIER||||Glyma02g04400|mRNA||PAC:16246953|)
Gm02	3701772	T	A	EFF=DOWNSTREAM(MODIFIER||||Glyma02g04530|mRNA||PAC:16246966|),INTRON(MODIFIER||||Glyma02g04540|mRNA||PAC:16246967|),INTRON(MODIFIER||||Glyma02g04540|mRNA||PAC:16246968|),INTRON(MODIFIER||||Glyma02g04540|mRNA||PAC:16246969|)
Gm02	3779086	CCGG	CCGGCGG	EFF=CODON_CHANGE_PLUS_CODON_INSERTION(MODERATE||gtt/gCGGtt|V42AV|Glyma02g04620|mRNA||PAC:16246979|PAC:16246979.exon.1)
Gm02	3799918	T	G	EFF=UPSTREAM(MODIFIER||||Glyma02g04640|mRNA||PAC:16246981|)
Gm02	3823729	T	C	EFF=INTRON(MODIFIER||||Glyma02g04700|mRNA||PAC:16246987|)
Gm02	3884126	T	A	EFF=UTR_5_PRIME(MODIFIER||||Glyma02g04740|mRNA||PAC:16246993|PAC:16246993.exon.1),UTR_5_PRIME(MODIFIER||||Glyma02g04740|mRNA||PAC:16246994|PAC:16246994.exon.1)
Gm02	3884209	A	G	EFF=UTR_5_PRIME(MODIFIER||||Glyma02g04740|mRNA||PAC:16246993|PAC:16246993.exon.1),UTR_5_PRIME(MODIFIER||||Glyma02g04740|mRNA||PAC:16246994|PAC:16246994.exon.1)
Gm02	3962870	C	T	EFF=DOWNSTREAM(MODIFIER||||Glyma02g04860|mRNA||PAC:16247007|),UPSTREAM(MODIFIER||||Glyma02g04850|mRNA||PAC:16247006|)
Gm02	3970727	G	C	EFF=UPSTREAM(MODIFIER||||Glyma02g04860|mRNA||PAC:16247007|)
Gm02	3987202	A	G	EFF=INTRON(MODIFIER||||Glyma02g04900|mRNA||PAC:16247010|)
Gm02	4007080	T	G	EFF=SYNONYMOUS_CODING(LOW|SILENT|gtT/gtG|V163|Glyma02g04930|mRNA||PAC:16247013|PAC:16247013.exon.1),UPSTREAM(MODIFIER||||Glyma02g04920|mRNA||PAC:16247012|)
Gm02	4113402	T	A	EFF=DOWNSTREAM(MODIFIER||||Glyma02g05070|mRNA||PAC:16247031|),INTRON(MODIFIER||||Glyma02g05060|mRNA||PAC:16247030|)
Gm02	4113418	A	G	EFF=DOWNSTREAM(MODIFIER||||Glyma02g05070|mRNA||PAC:16247031|),INTRON(MODIFIER||||Glyma02g05060|mRNA||PAC:16247030|)
Gm02	4113441	G	T	EFF=DOWNSTREAM(MODIFIER||||Glyma02g05070|mRNA||PAC:16247031|),INTRON(MODIFIER||||Glyma02g05060|mRNA||PAC:16247030|)
Gm02	4171957	C	T	EFF=NON_SYNONYMOUS_CODING(MODERATE|MISSENSE|Ccc/Tcc|P162S|Glyma02g05140|mRNA||PAC:16247039|PAC:16247039.exon.5)
Gm02	4172010	A	G	EFF=SYNONYMOUS_CODING(LOW|SILENT|ctA/ctG|L179|Glyma02g05140|mRNA||PAC:16247039|PAC:16247039.exon.5)
Gm02	4180694	T	C	EFF=INTRAGENIC(MODIFIER||||Glyma02g05150|mRNA|||)
Gm02	4198157	G	A	EFF=DOWNSTREAM(MODIFIER||||Glyma02g05160|mRNA||PAC:16247041|),DOWNSTREAM(MODIFIER||||Glyma02g05180|mRNA||PAC:16247043|),SYNONYMOUS_CODING(LOW|SILENT|gcC/gcT|A355|Glyma02g05170|mRNA||PAC:16247042|PAC:16247042.exon.4)
Gm02	4230323	G	C	EFF=NON_SYNONYMOUS_CODING(MODERATE|MISSENSE|Caa/Gaa|Q358E|Glyma02g05220|mRNA||PAC:16247047|PAC:16247047.exon.3)
Gm02	4306077	G	C	EFF=SYNONYMOUS_CODING(LOW|SILENT|gcC/gcG|A204|Glyma02g05320|mRNA||PAC:16247060|PAC:16247060.exon.2)
Gm02	4333885	T	C	EFF=INTRON(MODIFIER||||Glyma02g05360|mRNA||PAC:16247064|)
Gm02	4361295	C	T	EFF=NON_SYNONYMOUS_CODING(MODERATE|MISSENSE|Cgt/Tgt|R51C|Glyma02g05420|mRNA||PAC:16247070|PAC:16247070.exon.2),UPSTREAM(MODIFIER||||Glyma02g05400|mRNA||PAC:16247068|)
Gm02	4460209	C	T	EFF=SYNONYMOUS_CODING(LOW|SILENT|caG/caA|Q369|Glyma02g05580|mRNA||PAC:16247087|PAC:16247087.exon.7),UPSTREAM(MODIFIER||||Glyma02g05570|mRNA||PAC:16247086|)
Gm02	4460856	G	A	EFF=SYNONYMOUS_CODING(LOW|SILENT|Ctg/Ttg|L236|Glyma02g05580|mRNA||PAC:16247087|PAC:16247087.exon.5),UPSTREAM(MODIFIER||||Glyma02g05570|mRNA||PAC:16247086|)
Gm02	4460863	C	T	EFF=SYNONYMOUS_CODING(LOW|SILENT|caG/caA|Q233|Glyma02g05580|mRNA||PAC:16247087|PAC:16247087.exon.5),UPSTREAM(MODIFIER||||Glyma02g05570|mRNA||PAC:16247086|)
Gm02	4465585	T	A	EFF=INTRON(MODIFIER||||Glyma02g05580|mRNA||PAC:16247087|)
Gm02	4465606	T	C	EFF=INTRON(MODIFIER||||Glyma02g05580|mRNA||PAC:16247087|)
Gm02	4465607	A	T	EFF=INTRON(MODIFIER||||Glyma02g05580|mRNA||PAC:16247087|)
Gm02	4491924	G	T	EFF=UPSTREAM(MODIFIER||||Glyma02g05620|mRNA||PAC:16247091|)
Gm02	4551551	C	T	EFF=NON_SYNONYMOUS_CODING(MODERATE|MISSENSE|Ctt/Ttt|L349F|Glyma02g05680|mRNA||PAC:16247100|PAC:16247100.exon.5),UPSTREAM(MODIFIER||||Glyma02g05670|mRNA||PAC:16247097|),UPSTREAM(MODIFIER||||Glyma02g05670|mRNA||PAC:16247098|),UPSTREAM(MODIFIER||||Glyma02g05670|mRNA||PAC:16247099|)
Gm02	4688093	C	A	EFF=SYNONYMOUS_CODING(LOW|SILENT|gtG/gtT|V69|Glyma02g05830|mRNA||PAC:16247116|PAC:16247116.exon.2)
Gm02	4688208	A	T	EFF=INTRON(MODIFIER||||Glyma02g05830|mRNA||PAC:16247116|)
Gm02	4727630	C	A	EFF=SYNONYMOUS_CODING(LOW|SILENT|cgC/cgA|R546|Glyma02g05840|mRNA||PAC:16247117|PAC:16247117.exon.7)
Gm02	4786045	T	C	EFF=UPSTREAM(MODIFIER||||Glyma02g05950|mRNA||PAC:16247128|),UPSTREAM(MODIFIER||||Glyma02g05960|mRNA||PAC:16247129|)
Gm02	4879214	T	C	EFF=UPSTREAM(MODIFIER||||Glyma02g06090|mRNA||PAC:16247142|)
Gm02	4901534	A	G	EFF=NON_SYNONYMOUS_CODING(MODERATE|MISSENSE|Tct/Cct|S404P|Glyma02g06130|mRNA||PAC:16247147|PAC:16247147.exon.5),NON_SYNONYMOUS_CODING(MODERATE|MISSENSE|Tct/Cct|S431P|Glyma02g06130|mRNA||PAC:16247146|PAC:16247146.exon.4),UPSTREAM(MODIFIER||||Glyma02g06120|mRNA||PAC:16247145|)
Gm02	5036702	A	C	EFF=DOWNSTREAM(MODIFIER||||Glyma02g06320|mRNA||PAC:16247168|),INTRON(MODIFIER||||Glyma02g06330|mRNA||PAC:16247169|)
Gm02	5203706	C	A	EFF=UPSTREAM(MODIFIER||||Glyma02g06530|mRNA||PAC:16247193|)
Gm02	5248252	A	T	EFF=DOWNSTREAM(MODIFIER||||Glyma02g06590|mRNA||PAC:16247199|),UPSTREAM(MODIFIER||||Glyma02g06600|mRNA||PAC:16247200|)
Gm02	5327217	T	C	EFF=DOWNSTREAM(MODIFIER||||Glyma02g06720|mRNA||PAC:16247213|),DOWNSTREAM(MODIFIER||||Glyma02g06720|mRNA||PAC:16247214|),UPSTREAM(MODIFIER||||Glyma02g06710|mRNA||PAC:16247212|)
Gm02	5374574	C	T	EFF=NON_SYNONYMOUS_CODING(MODERATE|MISSENSE|Cct/Tct|P221S|Glyma02g06730|mRNA||PAC:16247215|PAC:16247215.exon.2)
Gm02	5394251	G	C	EFF=UTR_3_PRIME(MODIFIER||||Glyma02g06740|mRNA||PAC:16247216|PAC:16247216.exon.4)
Gm02	5394768	A	C	EFF=SYNONYMOUS_CODING(LOW|SILENT|ctT/ctG|L327|Glyma02g06740|mRNA||PAC:16247216|PAC:16247216.exon.4)
Gm02	5457236	T	G	EFF=DOWNSTREAM(MODIFIER||||Glyma02g06790|mRNA||PAC:16247221|),NON_SYNONYMOUS_CODING(MODERATE|MISSENSE|gAg/gCg|E33A|Glyma02g06800|mRNA||PAC:16247222|PAC:16247222.exon.1)
Gm02	5483575	G	T	EFF=NON_SYNONYMOUS_CODING(MODERATE|MISSENSE|Caa/Aaa|Q122K|Glyma02g06820|mRNA||PAC:16247225|PAC:16247225.exon.3),NON_SYNONYMOUS_CODING(MODERATE|MISSENSE|cCa/cAa|P131Q|Glyma02g06820|mRNA||PAC:16247224|PAC:16247224.exon.3),SYNONYMOUS_CODING(LOW|SILENT|gcC/gcA|A136|Glyma02g06820|mRNA||PAC:16247226|PAC:16247226.exon.3)
Gm02	5509548	G	T	EFF=NON_SYNONYMOUS_CODING(MODERATE|MISSENSE|gCg/gAg|A98E|Glyma02g06860|mRNA||PAC:16247230|PAC:16247230.exon.3)
Gm02	5617374	C	T	EFF=DOWNSTREAM(MODIFIER||||Glyma02g07020|mRNA||PAC:16247247|),INTRAGENIC(MODIFIER||||Glyma02g07000|mRNA|||),UPSTREAM(MODIFIER||||Glyma02g06990|mRNA||PAC:16247244|)
Gm02	5617416	G	A	EFF=DOWNSTREAM(MODIFIER||||Glyma02g07020|mRNA||PAC:16247247|),INTRAGENIC(MODIFIER||||Glyma02g07000|mRNA|||),UPSTREAM(MODIFIER||||Glyma02g06990|mRNA||PAC:16247244|)
Gm02	5665676	C	T	EFF=DOWNSTREAM(MODIFIER||||Glyma02g07090|mRNA||PAC:16247254|),INTRAGENIC(MODIFIER||||Glyma02g07100|mRNA|||),UPSTREAM(MODIFIER||||Glyma02g07110|mRNA||PAC:16247256|)
Gm02	5764372	CTTTT	CTTT	EFF=UPSTREAM(MODIFIER||||Glyma02g07260|mRNA||PAC:16247274|),UTR_3_PRIME(MODIFIER||||Glyma02g07250|mRNA||PAC:16247273|PAC:16247273.exon.12)
Gm02	5792392	T	A	EFF=DOWNSTREAM(MODIFIER||||Glyma02g07290|mRNA||PAC:16247278|),UPSTREAM(MODIFIER||||Glyma02g07280|mRNA||PAC:16247277|)
Gm02	5875955	T	C	EFF=DOWNSTREAM(MODIFIER||||Glyma02g07370|mRNA||PAC:16247286|),DOWNSTREAM(MODIFIER||||Glyma02g07390|mRNA||PAC:16247288|),DOWNSTREAM(MODIFIER||||Glyma02g07390|mRNA||PAC:16247289|)
Gm02	5929459	C	T	EFF=DOWNSTREAM(MODIFIER||||Glyma02g07490|mRNA||PAC:16247300|),UPSTREAM(MODIFIER||||Glyma02g07510|mRNA||PAC:16247302|),UPSTREAM(MODIFIER||||Glyma02g07510|mRNA||PAC:16247303|)
Gm02	5956522	T	C	EFF=DOWNSTREAM(MODIFIER||||Glyma02g07550|mRNA||PAC:16247307|),NON_SYNONYMOUS_CODING(MODERATE|MISSENSE|gTg/gCg|V329A|Glyma02g07540|mRNA||PAC:16247306|PAC:16247306.exon.2)
Gm02	5986429	T	C	EFF=INTRAGENIC(MODIFIER||||Glyma02g07590|mRNA|||)
Gm02	6061698	G	T	EFF=NON_SYNONYMOUS_CODING(MODERATE|MISSENSE|Gct/Tct|A87S|Glyma02g07680|mRNA||PAC:16247322|PAC:16247322.exon.1),UPSTREAM(MODIFIER||||Glyma02g07670|mRNA||PAC:16247321|)
Gm02	6113610	C	A	EFF=STOP_GAINED(HIGH|NONSENSE|Gaa/Taa|E110*|Glyma02g07730|mRNA||PAC:16247327|PAC:16247327.exon.2)
Gm02	6241261	G	C	EFF=NON_SYNONYMOUS_CODING(MODERATE|MISSENSE|gaC/gaG|D151E|Glyma02g07910|mRNA||PAC:16247345|PAC:16247345.exon.3)
Gm02	6591388	C	T	EFF=NON_SYNONYMOUS_CODING(MODERATE|MISSENSE|Gcg/Acg|A18T|Glyma02g08390|mRNA||PAC:16247398|PAC:16247398.exon.1),UPSTREAM(MODIFIER||||Glyma02g08400|mRNA||PAC:16247399|)
Gm02	6639215	TGAGAGAGAGAGAGAGAGAGAGAGAGAG	TGAGAGAGAGAGAGAGAGAGAGAGAG	EFF=DOWNSTREAM(MODIFIER||||Glyma02g08500|mRNA||PAC:16247409|),FRAME_SHIFT(HIGH||||Glyma02g08490|mRNA||PAC:16247408|PAC:16247408.exon.1)
Gm02	6671113	A	G	EFF=INTRON(MODIFIER||||Glyma02g08550|mRNA||PAC:16247416|),INTRON(MODIFIER||||Glyma02g08550|mRNA||PAC:16247417|)
Gm02	6831984	T	C	EFF=NON_SYNONYMOUS_CODING(MODERATE|MISSENSE|Acg/Gcg|T278A|Glyma02g08840|mRNA||PAC:16247447|PAC:16247447.exon.4)
Gm02	6956726	C	T	EFF=UTR_3_PRIME(MODIFIER||||Glyma02g09000|mRNA||PAC:16247465|PAC:16247465.exon.1)
Gm02	7060106	A	G	EFF=INTERGENIC(MODIFIER||||||||)
Gm02	7241145	T	C	EFF=INTRAGENIC(MODIFIER||||Glyma02g09250|mRNA|||)
Gm02	7334927	T	C	EFF=DOWNSTREAM(MODIFIER||||Glyma02g09350|mRNA||PAC:16247506|),INTRON(MODIFIER||||Glyma02g09360|mRNA||PAC:16247507|),UPSTREAM(MODIFIER||||Glyma02g09370|mRNA||PAC:16247508|)
Gm02	7339723	T	C	EFF=DOWNSTREAM(MODIFIER||||Glyma02g09360|mRNA||PAC:16247507|),DOWNSTREAM(MODIFIER||||Glyma02g09380|mRNA||PAC:16247509|),SYNONYMOUS_CODING(LOW|SILENT|gtT/gtC|V97|Glyma02g09370|mRNA||PAC:16247508|PAC:16247508.exon.1)
Gm02	7339837	A	G	EFF=DOWNSTREAM(MODIFIER||||Glyma02g09360|mRNA||PAC:16247507|),DOWNSTREAM(MODIFIER||||Glyma02g09380|mRNA||PAC:16247509|),SYNONYMOUS_CODING(LOW|SILENT|gcA/gcG|A135|Glyma02g09370|mRNA||PAC:16247508|PAC:16247508.exon.1)
Gm02	7340104	TTGT	TTGTGT	EFF=DOWNSTREAM(MODIFIER||||Glyma02g09360|mRNA||PAC:16247507|),DOWNSTREAM(MODIFIER||||Glyma02g09380|mRNA||PAC:16247509|),INTRON(MODIFIER||||Glyma02g09370|mRNA||PAC:16247508|)
Gm02	7352204	A	C	EFF=INTRON(MODIFIER||||Glyma02g09380|mRNA||PAC:16247509|)
Gm02	7453624	T	C	EFF=DOWNSTREAM(MODIFIER||||Glyma02g09500|mRNA||PAC:16247521|),INTRON(MODIFIER||||Glyma02g09510|mRNA||PAC:16247522|)
Gm02	7467674	T	C	EFF=DOWNSTREAM(MODIFIER||||Glyma02g09550|mRNA||PAC:16247527|),SYNONYMOUS_CODING(LOW|SILENT|agA/agG|R122|Glyma02g09540|mRNA||PAC:16247525|PAC:16247525.exon.3)
Gm02	7528821	G	A	EFF=INTRON(MODIFIER||||Glyma02g09600|mRNA||PAC:16247532|)
Gm02	7532953	C	T	EFF=NON_SYNONYMOUS_CODING(MODERATE|MISSENSE|Gca/Aca|A96T|Glyma02g09600|mRNA||PAC:16247532|PAC:16247532.exon.1)
Gm02	7676791	T	C	EFF=UPSTREAM(MODIFIER||||Glyma02g09710|mRNA||PAC:16247545|)
Gm02	7676799	G	C	EFF=UPSTREAM(MODIFIER||||Glyma02g09710|mRNA||PAC:16247545|)
Gm02	7894676	C	T	EFF=INTRON(MODIFIER||||Glyma02g09990|mRNA||PAC:16247572|)
Gm02	8222105	C	T	EFF=INTRAGENIC(MODIFIER||||Glyma02g10340|mRNA|||),UPSTREAM(MODIFIER||||Glyma02g10350|mRNA||PAC:16247610|)
Gm02	8222112	T	A	EFF=INTRAGENIC(MODIFIER||||Glyma02g10340|mRNA|||),UPSTREAM(MODIFIER||||Glyma02g10350|mRNA||PAC:16247610|)
Gm02	8222153	G	A	EFF=INTRAGENIC(MODIFIER||||Glyma02g10340|mRNA|||),UPSTREAM(MODIFIER||||Glyma02g10350|mRNA||PAC:16247610|)
Gm02	8258236	C	T	EFF=NON_SYNONYMOUS_CODING(MODERATE|MISSENSE|Cgc/Tgc|R1065C|Glyma02g10370|mRNA||PAC:16247612|PAC:16247612.exon.14)
Gm02	8367888	A	C	EFF=DOWNSTREAM(MODIFIER||||Glyma02g10470|mRNA||PAC:16247623|),INTRON(MODIFIER||||Glyma02g10480|mRNA||PAC:16247624|),INTRON(MODIFIER||||Glyma02g10480|mRNA||PAC:16247625|),INTRON(MODIFIER||||Glyma02g10480|mRNA||PAC:16247626|),INTRON(MODIFIER||||Glyma02g10480|mRNA||PAC:16247627|)
Gm02	8410595	T	C	EFF=DOWNSTREAM(MODIFIER||||Glyma02g10530|mRNA||PAC:16247632|),SYNONYMOUS_CODING(LOW|SILENT|gtA/gtG|V84|Glyma02g10520|mRNA||PAC:16247631|PAC:16247631.exon.2)
Gm02	8440397	T	C	EFF=SYNONYMOUS_CODING(LOW|SILENT|ttA/ttG|L71|Glyma02g10560|mRNA||PAC:16247637|PAC:16247637.exon.1)
Gm02	8440412	C	G	EFF=SYNONYMOUS_CODING(LOW|SILENT|ctG/ctC|L66|Glyma02g10560|mRNA||PAC:16247637|PAC:16247637.exon.1)
Gm02	8671426	C	T	EFF=SYNONYMOUS_CODING(LOW|SILENT|cgG/cgA|R221|Glyma02g10780|mRNA||PAC:16247662|PAC:16247662.exon.6)
Gm02	8673114	T	G	EFF=INTRON(MODIFIER||||Glyma02g10780|mRNA||PAC:16247662|)
Gm02	8887532	T	C	EFF=INTRON(MODIFIER||||Glyma02g10880|mRNA||PAC:16247674|)
Gm02	8930836	G	A	EFF=INTERGENIC(MODIFIER||||||||)
Gm02	8961540	A	G	EFF=INTERGENIC(MODIFIER||||||||)
Gm02	8961550	C	T	EFF=INTERGENIC(MODIFIER||||||||)
Gm02	9179603	C	T	EFF=INTRON(MODIFIER||||Glyma02g11030|mRNA||PAC:16247689|),INTRON(MODIFIER||||Glyma02g11030|mRNA||PAC:16247690|)
Gm02	9258401	A	G	EFF=INTERGENIC(MODIFIER||||||||)
Gm02	9331185	T	A	EFF=DOWNSTREAM(MODIFIER||||Glyma02g11110|mRNA||PAC:16247698|),UPSTREAM(MODIFIER||||Glyma02g11120|mRNA||PAC:16247699|)
Gm02	9357176	C	T	EFF=UPSTREAM(MODIFIER||||Glyma02g11150|mRNA||PAC:16247702|),UPSTREAM(MODIFIER||||Glyma02g11160|mRNA||PAC:16247703|),UPSTREAM(MODIFIER||||Glyma02g11170|mRNA||PAC:16247704|)
Gm02	9357258	G	A	EFF=UPSTREAM(MODIFIER||||Glyma02g11150|mRNA||PAC:16247702|),UPSTREAM(MODIFIER||||Glyma02g11160|mRNA||PAC:16247703|),UPSTREAM(MODIFIER||||Glyma02g11170|mRNA||PAC:16247704|)
Gm02	9378463	T	C	EFF=SYNONYMOUS_CODING(LOW|SILENT|ctT/ctC|L99|Glyma02g11190|mRNA||PAC:16247706|PAC:16247706.exon.2)
Gm02	9491461	C	A	EFF=INTERGENIC(MODIFIER||||||||)
Gm02	9586872	G	A	EFF=NON_SYNONYMOUS_CODING(MODERATE|MISSENSE|tCc/tTc|S53F|Glyma02g11390|mRNA||PAC:16247729|PAC:16247729.exon.2),UPSTREAM(MODIFIER||||Glyma02g11400|mRNA||PAC:16247730|)
Gm02	9666503	T	C	EFF=SYNONYMOUS_CODING(LOW|SILENT|tgT/tgC|C347|Glyma02g11480|mRNA||PAC:16247739|PAC:16247739.exon.1)
Gm02	9714654	A	G	EFF=UPSTREAM(MODIFIER||||Glyma02g11510|mRNA||PAC:16247742|)
Gm02	10033861	T	C	EFF=SYNONYMOUS_CODING(LOW|SILENT|gcA/gcG|A178|Glyma02g11790|mRNA||PAC:16247770|PAC:16247770.exon.8),SYNONYMOUS_CODING(LOW|SILENT|gcA/gcG|A64|Glyma02g11790|mRNA||PAC:16247771|PAC:16247771.exon.4)
Gm02	10173302	C	T	EFF=INTRON(MODIFIER||||Glyma02g11960|mRNA||PAC:16247789|)
Gm02	10305738	AAACAACAACAACAACA	AAACAACAACAACAACAACA	EFF=CODON_CHANGE_PLUS_CODON_INSERTION(MODERATE||aca/aACAca|T216NT|Glyma02g12080|mRNA||PAC:16247800|PAC:16247800.exon.2)
Gm02	10305743	ACA	ACAGCA	EFF=CODON_CHANGE_PLUS_CODON_INSERTION(MODERATE||aac/aGCAac|N213SN|Glyma02g12080|mRNA||PAC:16247800|PAC:16247800.exon.2)
Gm02	10346162	A	G	EFF=INTERGENIC(MODIFIER||||||||)
Gm02	10811570	C	CA	EFF=DOWNSTREAM(MODIFIER||||Glyma02g12500|mRNA||PAC:16247851|),DOWNSTREAM(MODIFIER||||Glyma02g12520|mRNA||PAC:16247854|),DOWNSTREAM(MODIFIER||||Glyma02g12520|mRNA||PAC:16247855|),UTR_3_PRIME(MODIFIER||||Glyma02g12520|mRNA||PAC:16247853|PAC:16247853.exon.7)
Gm02	10825280	CGAGAGAGAGAGAGAGAGAGAGAGA	CGAGAGAGAGAGAGAGAGAGAGA	EFF=DOWNSTREAM(MODIFIER||||Glyma02g12540|mRNA||PAC:16247857|),UPSTREAM(MODIFIER||||Glyma02g12530|mRNA||PAC:16247856|)
Gm02	10834693	G	A	EFF=UPSTREAM(MODIFIER||||Glyma02g12540|mRNA||PAC:16247857|),UPSTREAM(MODIFIER||||Glyma02g12560|mRNA||PAC:16247859|),UPSTREAM(MODIFIER||||Glyma02g12560|mRNA||PAC:16247860|)
Gm02	11032098	C	T	EFF=DOWNSTREAM(MODIFIER||||Glyma02g12760|mRNA||PAC:16247883|),NON_SYNONYMOUS_CODING(MODERATE|MISSENSE|atG/atA|M503I|Glyma02g12770|mRNA||PAC:16247884|PAC:16247884.exon.1)
Gm02	11032239	T	C	EFF=DOWNSTREAM(MODIFIER||||Glyma02g12760|mRNA||PAC:16247883|),SYNONYMOUS_CODING(LOW|SILENT|gcA/gcG|A456|Glyma02g12770|mRNA||PAC:16247884|PAC:16247884.exon.1)
Gm02	11341924	ATTTT	ATTT	EFF=INTRON(MODIFIER||||Glyma02g13120|mRNA||PAC:16247926|)
Gm02	11373729	G	A	EFF=INTRON(MODIFIER||||Glyma02g13160|mRNA||PAC:16247930|)
Gm02	11473625	G	C	EFF=INTRON(MODIFIER||||Glyma02g13220|mRNA||PAC:16247940|)
Gm02	11501352	T	G	EFF=INTRON(MODIFIER||||Glyma02g13240|mRNA||PAC:16247942|)
Gm02	11533850	A	G	EFF=UPSTREAM(MODIFIER||||Glyma02g13260|mRNA||PAC:16247945|),UTR_3_PRIME(MODIFIER||||Glyma02g13270|mRNA||PAC:16247946|PAC:16247946.exon.4)
Gm02	11552738	G	C	EFF=START_LOST(HIGH|MISSENSE|atG/atC|M1I|Glyma02g13290|mRNA||PAC:16247948|PAC:16247948.exon.1)
Gm02	11552817	C	A	EFF=NON_SYNONYMOUS_CODING(MODERATE|MISSENSE|Ccg/Acg|P28T|Glyma02g13290|mRNA||PAC:16247948|PAC:16247948.exon.1)
Gm02	11552832	C	T	EFF=SYNONYMOUS_CODING(LOW|SILENT|Ctg/Ttg|L33|Glyma02g13290|mRNA||PAC:16247948|PAC:16247948.exon.1)
Gm02	11599471	G	C	EFF=UPSTREAM(MODIFIER||||Glyma02g13330|mRNA||PAC:16247952|)
Gm02	11750563	G	A	EFF=INTRON(MODIFIER||||Glyma02g13420|mRNA||PAC:16247962|)
Gm02	11959994	A	G	EFF=DOWNSTREAM(MODIFIER||||Glyma02g13640|mRNA||PAC:16247982|),UPSTREAM(MODIFIER||||Glyma02g13650|mRNA||PAC:16247983|)
Gm02	13145467	A	T	EFF=NON_SYNONYMOUS_CODING(MODERATE|MISSENSE|gTc/gAc|V12D|Glyma02g14520|mRNA||PAC:16248074|PAC:16248074.exon.1)
Gm02	13698981	A	G	EFF=UTR_5_PRIME(MODIFIER||||Glyma02g15190|mRNA||PAC:16248135|PAC:16248135.exon.1)
Gm02	13702251	T	C	EFF=INTRON(MODIFIER||||Glyma02g15190|mRNA||PAC:16248135|)
Gm02	13742394	G	A	EFF=SYNONYMOUS_CODING(LOW|SILENT|Ctg/Ttg|L86|Glyma02g15230|mRNA||PAC:16248139|PAC:16248139.exon.2)
Gm02	14003182	T	G	EFF=DOWNSTREAM(MODIFIER||||Glyma02g15510|mRNA||PAC:16248172|)
Gm02	14042987	A	C	EFF=INTRON(MODIFIER||||Glyma02g15550|mRNA||PAC:16248178|)
Gm02	14047223	GCCCCC	GCCC	EFF=INTRON(MODIFIER||||Glyma02g15550|mRNA||PAC:16248178|)
Gm02	14214521	G	T	EFF=INTERGENIC(MODIFIER||||||||)
Gm02	14214593	C	T	EFF=INTERGENIC(MODIFIER||||||||)
Gm02	14302459	A	C	EFF=DOWNSTREAM(MODIFIER||||Glyma02g15790|mRNA||PAC:16248206|),DOWNSTREAM(MODIFIER||||Glyma02g15810|mRNA||PAC:16248208|),DOWNSTREAM(MODIFIER||||Glyma02g15810|mRNA||PAC:16248209|),DOWNSTREAM(MODIFIER||||Glyma02g15810|mRNA||PAC:16248210|)
Gm02	14302487	C	T	EFF=DOWNSTREAM(MODIFIER||||Glyma02g15790|mRNA||PAC:16248206|),DOWNSTREAM(MODIFIER||||Glyma02g15810|mRNA||PAC:16248208|),DOWNSTREAM(MODIFIER||||Glyma02g15810|mRNA||PAC:16248209|),DOWNSTREAM(MODIFIER||||Glyma02g15810|mRNA||PAC:16248210|)
Gm02	14334504	G	A	EFF=DOWNSTREAM(MODIFIER||||Glyma02g15840|mRNA||PAC:16248213|),DOWNSTREAM(MODIFIER||||Glyma02g15840|mRNA||PAC:16248214|),UPSTREAM(MODIFIER||||Glyma02g15850|mRNA||PAC:16248215|),UPSTREAM(MODIFIER||||Glyma02g15850|mRNA||PAC:16248216|)
Gm02	14357368	CAAAAA	CAAAA	EFF=DOWNSTREAM(MODIFIER||||Glyma02g15880|mRNA||PAC:16248219|)
Gm02	14357378	G	A	EFF=DOWNSTREAM(MODIFIER||||Glyma02g15880|mRNA||PAC:16248219|)
Gm02	14357395	G	A	EFF=DOWNSTREAM(MODIFIER||||Glyma02g15880|mRNA||PAC:16248219|)
Gm02	14373021	A	G	EFF=INTRON(MODIFIER||||Glyma02g15910|mRNA||PAC:16248221|),NON_SYNONYMOUS_CODING(MODERATE|MISSENSE|gTt/gCt|V185A|Glyma02g15910|mRNA||PAC:16248220|PAC:16248220.exon.2)
Gm02	14407810	T	C	EFF=INTRAGENIC(MODIFIER||||Glyma02g15950|mRNA|||)
Gm02	14555463	G	C	EFF=NON_SYNONYMOUS_CODING(MODERATE|MISSENSE|Caa/Gaa|Q302E|Glyma02g16140|mRNA||PAC:16248249|PAC:16248249.exon.3)
Gm02	14853471	C	G	EFF=DOWNSTREAM(MODIFIER||||Glyma02g16450|mRNA||PAC:16248285|),NON_SYNONYMOUS_CODING(MODERATE|MISSENSE|Gaa/Caa|E96Q|Glyma02g16440|mRNA||PAC:16248284|PAC:16248284.exon.1)
Gm02	15108526	C	T	EFF=INTERGENIC(MODIFIER||||||||)
Gm02	15365433	T	C	EFF=INTRON(MODIFIER||||Glyma02g17020|mRNA||PAC:16248350|)
Gm02	15365472	A	C	EFF=NON_SYNONYMOUS_CODING(MODERATE|MISSENSE|gAg/gCg|E310A|Glyma02g17020|mRNA||PAC:16248350|PAC:16248350.exon.3)
Gm02	15368490	C	A	EFF=DOWNSTREAM(MODIFIER||||Glyma02g17020|mRNA||PAC:16248350|),UPSTREAM(MODIFIER||||Glyma02g17040|mRNA||PAC:16248352|)
Gm02	15368499	T	C	EFF=DOWNSTREAM(MODIFIER||||Glyma02g17020|mRNA||PAC:16248350|),UPSTREAM(MODIFIER||||Glyma02g17040|mRNA||PAC:16248352|)
Gm02	15374311	G	A	EFF=INTRON(MODIFIER||||Glyma02g17040|mRNA||PAC:16248352|)
Gm02	15374456	A	T	EFF=INTRON(MODIFIER||||Glyma02g17040|mRNA||PAC:16248352|)
Gm02	15430377	G	A	EFF=INTRON(MODIFIER||||Glyma02g17110|mRNA||PAC:16248359|),UPSTREAM(MODIFIER||||Glyma02g17100|mRNA||PAC:16248358|)
Gm02	15455800	A	G	EFF=DOWNSTREAM(MODIFIER||||Glyma02g17140|mRNA||PAC:16248363|),INTRON(MODIFIER||||Glyma02g17150|mRNA||PAC:16248364|)
Gm02	15467385	C	T	EFF=DOWNSTREAM(MODIFIER||||Glyma02g17160|mRNA||PAC:16248365|)
Gm02	15498068	T	C	EFF=DOWNSTREAM(MODIFIER||||Glyma02g17180|mRNA||PAC:16248367|)
Gm02	15602656	A	G	EFF=INTERGENIC(MODIFIER||||||||)
Gm02	15682775	C	T	EFF=UPSTREAM(MODIFIER||||Glyma02g17410|mRNA||PAC:16248394|)
Gm02	15685125	G	A	EFF=UPSTREAM(MODIFIER||||Glyma02g17410|mRNA||PAC:16248394|)
Gm02	15723632	C	T	EFF=DOWNSTREAM(MODIFIER||||Glyma02g17440|mRNA||PAC:16248398|),INTRON(MODIFIER||||Glyma02g17470|mRNA||PAC:16248401|),INTRON(MODIFIER||||Glyma02g17470|mRNA||PAC:16248403|),INTRON(MODIFIER||||Glyma02g17470|mRNA||PAC:16248404|),INTRON(MODIFIER||||Glyma02g17470|mRNA||PAC:16248405|),INTRON(MODIFIER||||Glyma02g17470|mRNA||PAC:16248406|),UTR_3_PRIME(MODIFIER||||Glyma02g17470|mRNA||PAC:16248402|PAC:162484…
Gm02	15826751	C	T	EFF=INTERGENIC(MODIFIER||||||||)
Gm02	15907615	A	G	EFF=INTERGENIC(MODIFIER||||||||)
Gm02	16052935	G	T	EFF=INTERGENIC(MODIFIER||||||||)
Gm02	16074296	C	A	EFF=INTERGENIC(MODIFIER||||||||)
Gm02	16120453	G	A	EFF=INTERGENIC(MODIFIER||||||||)
Gm02	16256962	A	G	EFF=INTERGENIC(MODIFIER||||||||)
Gm02	16256981	G	A	EFF=INTERGENIC(MODIFIER||||||||)
Gm02	16264005	A	G	EFF=INTERGENIC(MODIFIER||||||||)
Gm02	16271833	A	C	EFF=INTERGENIC(MODIFIER||||||||)
Gm02	16424402	G	A	EFF=INTERGENIC(MODIFIER||||||||)
Gm02	16676721	G	A	EFF=INTRON(MODIFIER||||Glyma02g18200|mRNA||PAC:16248440|)
Gm02	16785446	G	A	EFF=SYNONYMOUS_CODING(LOW|SILENT|Ctg/Ttg|L434|Glyma02g18230|mRNA||PAC:16248443|PAC:16248443.exon.4)
Gm02	16925067	T	C	EFF=UPSTREAM(MODIFIER||||Glyma02g18280|mRNA||PAC:16248452|)
Gm02	17090407	G	A	EFF=INTERGENIC(MODIFIER||||||||)
Gm02	17090654	T	C	EFF=INTERGENIC(MODIFIER||||||||)
Gm02	17117060	A	G	EFF=INTERGENIC(MODIFIER||||||||)
Gm02	17263867	A	C	EFF=INTERGENIC(MODIFIER||||||||)
Gm02	17398676	C	T	EFF=INTERGENIC(MODIFIER||||||||)
Gm02	17438454	G	A	EFF=INTERGENIC(MODIFIER||||||||)
Gm02	17500443	A	G	EFF=INTRAGENIC(MODIFIER||||Glyma02g18670|mRNA|||)
Gm02	17606666	G	A	EFF=INTERGENIC(MODIFIER||||||||)
Gm02	17623119	A	C	EFF=INTERGENIC(MODIFIER||||||||)
Gm02	18443950	ATTTTTTT	ATTTTTT	EFF=DOWNSTREAM(MODIFIER||||Glyma02g19410|mRNA||PAC:16248492|)
Gm02	18643616	A	C	EFF=INTERGENIC(MODIFIER||||||||)
Gm02	18779559	C	T	EFF=INTERGENIC(MODIFIER||||||||)
Gm02	18798918	C	A	EFF=INTERGENIC(MODIFIER||||||||)
Gm02	19305902	A	C	EFF=INTERGENIC(MODIFIER||||||||)
Gm02	19651198	T	C	EFF=INTERGENIC(MODIFIER||||||||)
Gm02	19685274	G	C	EFF=INTERGENIC(MODIFIER||||||||)
Gm02	20141288	A	T	EFF=INTERGENIC(MODIFIER||||||||)
Gm02	20197295	C	A	EFF=INTERGENIC(MODIFIER||||||||)
Gm02	20363813	A	G	EFF=INTERGENIC(MODIFIER||||||||)
Gm02	20373853	A	G	EFF=INTERGENIC(MODIFIER||||||||)
Gm02	20804126	A	G	EFF=UPSTREAM(MODIFIER||||Glyma02g21590|mRNA||PAC:16248519|)
Gm02	20911041	A	G	EFF=INTERGENIC(MODIFIER||||||||)
Gm02	20974253	C	T	EFF=NON_SYNONYMOUS_CODING(MODERATE|MISSENSE|Ctt/Ttt|L185F|Glyma02g21820|mRNA||PAC:16248523|PAC:16248523.exon.1)
Gm02	21111255	T	C	EFF=INTERGENIC(MODIFIER||||||||)
Gm02	21543636	G	A	EFF=INTERGENIC(MODIFIER||||||||)
Gm02	21620082	G	A	EFF=INTERGENIC(MODIFIER||||||||)
Gm02	21722118	C	T	EFF=INTERGENIC(MODIFIER||||||||)
Gm02	21722169	G	A	EFF=INTERGENIC(MODIFIER||||||||)
Gm02	21796217	G	A	EFF=NON_SYNONYMOUS_CODING(MODERATE|MISSENSE|cGc/cAc|R20H|Glyma02g22520|mRNA||PAC:16248535|PAC:16248535.exon.1)
Gm02	21796256	C	T	EFF=NON_SYNONYMOUS_CODING(MODERATE|MISSENSE|aCg/aTg|T33M|Glyma02g22520|mRNA||PAC:16248535|PAC:16248535.exon.1)
Gm02	21796383	T	C	EFF=INTRON(MODIFIER||||Glyma02g22520|mRNA||PAC:16248535|)
Gm02	21959178	C	T	EFF=INTERGENIC(MODIFIER||||||||)
Gm02	22011903	C	T	EFF=INTERGENIC(MODIFIER||||||||)
Gm02	22036400	T	C	EFF=INTERGENIC(MODIFIER||||||||)
Gm02	22885555	G	A	EFF=INTERGENIC(MODIFIER||||||||)
Gm02	23139152	C	A	EFF=INTERGENIC(MODIFIER||||||||)
Gm02	23175496	C	G	EFF=INTERGENIC(MODIFIER||||||||)
Gm02	23233023	G	A	EFF=INTERGENIC(MODIFIER||||||||)
Gm02	23839125	G	A	EFF=INTERGENIC(MODIFIER||||||||)
Gm02	24113572	A	G	EFF=INTERGENIC(MODIFIER||||||||)
Gm02	24468463	A	G	EFF=INTERGENIC(MODIFIER||||||||)
Gm02	24468655	C	T	EFF=INTERGENIC(MODIFIER||||||||)
Gm02	24645740	A	G	EFF=INTERGENIC(MODIFIER||||||||)
Gm02	24751021	T	C	EFF=INTERGENIC(MODIFIER||||||||)
Gm02	24871420	C	T	EFF=INTRAGENIC(MODIFIER||||Glyma02g24290|mRNA|||)
Gm02	24993659	C	T	EFF=INTERGENIC(MODIFIER||||||||)
Gm02	25123826	C	T	EFF=INTERGENIC(MODIFIER||||||||)
Gm02	25183647	T	C	EFF=INTERGENIC(MODIFIER||||||||)
Gm02	25366632	G	T	EFF=INTERGENIC(MODIFIER||||||||)
Gm02	25366651	T	G	EFF=INTERGENIC(MODIFIER||||||||)
Gm02	25392084	A	C	EFF=INTERGENIC(MODIFIER||||||||)
Gm02	25965462	T	C	EFF=INTRON(MODIFIER||||Glyma02g25240|mRNA||PAC:16248574|)
Gm02	25972721	T	G	EFF=UPSTREAM(MODIFIER||||Glyma02g25250|mRNA||PAC:16248575|),UPSTREAM(MODIFIER||||Glyma02g25250|mRNA||PAC:16248576|),UTR_3_PRIME(MODIFIER||||Glyma02g25240|mRNA||PAC:16248574|PAC:16248574.exon.19)
Gm02	26042086	A	T	EFF=DOWNSTREAM(MODIFIER||||Glyma02g25290|mRNA||PAC:16248580|),INTRON(MODIFIER||||Glyma02g25300|mRNA||PAC:16248581|)
Gm02	26116444	C	A	EFF=INTERGENIC(MODIFIER||||||||)
Gm02	26201485	G	C	EFF=INTERGENIC(MODIFIER||||||||)
Gm02	26329316	A	G	EFF=INTERGENIC(MODIFIER||||||||)
Gm02	27103342	C	T	EFF=INTERGENIC(MODIFIER||||||||)
Gm02	27103355	C	T	EFF=INTERGENIC(MODIFIER||||||||)
Gm02	27292686	C	T	EFF=INTERGENIC(MODIFIER||||||||)
Gm02	27292739	A	T	EFF=INTERGENIC(MODIFIER||||||||)
Gm02	27320609	C	T	EFF=SYNONYMOUS_CODING(LOW|SILENT|tcG/tcA|S1330|Glyma02g26450|mRNA||PAC:16248600|PAC:16248600.exon.2)
Gm02	27362340	A	C	EFF=SYNONYMOUS_CODING(LOW|SILENT|ggT/ggG|G175|Glyma02g26480|mRNA||PAC:16248603|PAC:16248603.exon.3),UPSTREAM(MODIFIER||||Glyma02g26470|mRNA||PAC:16248602|)
Gm02	27604854	A	C	EFF=INTRON(MODIFIER||||Glyma02g26630|mRNA||PAC:16248618|),INTRON(MODIFIER||||Glyma02g26630|mRNA||PAC:16248619|)
Gm02	27607624	A	C	EFF=INTRON(MODIFIER||||Glyma02g26630|mRNA||PAC:16248618|),INTRON(MODIFIER||||Glyma02g26630|mRNA||PAC:16248619|)
Gm02	27608598	C	T	EFF=INTRON(MODIFIER||||Glyma02g26630|mRNA||PAC:16248618|),INTRON(MODIFIER||||Glyma02g26630|mRNA||PAC:16248619|)
Gm02	27621230	A	G	EFF=INTERGENIC(MODIFIER||||||||)
Gm02	27654086	T	C	EFF=INTRON(MODIFIER||||Glyma02g26650|mRNA||PAC:16248621|)
Gm02	27751199	C	T	EFF=INTRON(MODIFIER||||Glyma02g26710|mRNA||PAC:16248627|)
Gm02	27751260	A	G	EFF=INTRON(MODIFIER||||Glyma02g26710|mRNA||PAC:16248627|)
Gm02	27788207	C	T	EFF=INTERGENIC(MODIFIER||||||||)
Gm02	27806302	A	G	EFF=INTERGENIC(MODIFIER||||||||)
Gm02	27958627	C	T	EFF=UPSTREAM(MODIFIER||||Glyma02g26850|mRNA||PAC:16248646|),UPSTREAM(MODIFIER||||Glyma02g26850|mRNA||PAC:16248647|)
Gm02	28160340	A	G	EFF=INTERGENIC(MODIFIER||||||||)
Gm02	28160414	A	G	EFF=INTERGENIC(MODIFIER||||||||)
Gm02	28203735	G	A	EFF=INTERGENIC(MODIFIER||||||||)
Gm02	28333185	C	T	EFF=INTERGENIC(MODIFIER||||||||)
Gm02	28592911	C	T	EFF=INTERGENIC(MODIFIER||||||||)
Gm02	28643498	T	C	EFF=SYNONYMOUS_CODING(LOW|SILENT|gtA/gtG|V143|Glyma02g27260|mRNA||PAC:16248689|PAC:16248689.exon.1),SYNONYMOUS_CODING(LOW|SILENT|gtA/gtG|V143|Glyma02g27260|mRNA||PAC:16248690|PAC:16248690.exon.1)
Gm02	28643986	A	G	EFF=UPSTREAM(MODIFIER||||Glyma02g27260|mRNA||PAC:16248689|),UPSTREAM(MODIFIER||||Glyma02g27260|mRNA||PAC:16248690|)
Gm02	28719889	T	C	EFF=INTERGENIC(MODIFIER||||||||)
Gm02	28824783	C	T	EFF=DOWNSTREAM(MODIFIER||||Glyma02g27460|mRNA||PAC:16248691|)
Gm02	28952832	C	T	EFF=INTERGENIC(MODIFIER||||||||)
Gm02	29371252	G	A	EFF=INTERGENIC(MODIFIER||||||||)
Gm02	29371270	T	C	EFF=INTERGENIC(MODIFIER||||||||)
Gm02	29371305	C	T	EFF=INTERGENIC(MODIFIER||||||||)
Gm02	29809634	A	G	EFF=INTERGENIC(MODIFIER||||||||)
Gm02	30094964	C	T	EFF=SYNONYMOUS_CODING(LOW|SILENT|tcG/tcA|S109|Glyma02g28860|mRNA||PAC:16248731|PAC:16248731.exon.3)
Gm02	30209484	A	G	EFF=UPSTREAM(MODIFIER||||Glyma02g28910|mRNA||PAC:16248737|)
Gm02	30212616	T	C	EFF=UPSTREAM(MODIFIER||||Glyma02g28910|mRNA||PAC:16248737|)
Gm02	30249033	A	G	EFF=INTERGENIC(MODIFIER||||||||)
Gm02	30361480	AC	A	EFF=DOWNSTREAM(MODIFIER||||Glyma02g28970|mRNA||PAC:16248742|)
Gm02	30862143	T	C	EFF=INTERGENIC(MODIFIER||||||||)
Gm02	31125546	G	A	EFF=UPSTREAM(MODIFIER||||Glyma02g29450|mRNA||PAC:16248788|)
Gm02	32563645	C	G	EFF=INTERGENIC(MODIFIER||||||||)
Gm02	32769729	G	A	EFF=INTERGENIC(MODIFIER||||||||)
Gm02	32958970	T	C	EFF=INTERGENIC(MODIFIER||||||||)
Gm02	32958989	C	T	EFF=INTERGENIC(MODIFIER||||||||)
Gm02	33117418	G	T	EFF=INTRON(MODIFIER||||Glyma02g30840|mRNA||PAC:16248866|),NON_SYNONYMOUS_CODING(MODERATE|MISSENSE|Cag/Aag|Q401K|Glyma02g30840|mRNA||PAC:16248865|PAC:16248865.exon.7)
Gm02	33498548	C	T	EFF=DOWNSTREAM(MODIFIER||||Glyma02g30990|mRNA||PAC:16248882|)
Gm02	34032522	G	A	EFF=SYNONYMOUS_CODING(LOW|SILENT|gcC/gcT|A183|Glyma02g31280|mRNA||PAC:16248909|PAC:16248909.exon.3)
Gm02	34533635	CTTT	CTT	EFF=INTERGENIC(MODIFIER||||||||)
Gm02	34533670	T	C	EFF=INTERGENIC(MODIFIER||||||||)
Gm02	34765499	C	T	EFF=INTERGENIC(MODIFIER||||||||)
Gm02	35213793	T	C	EFF=INTERGENIC(MODIFIER||||||||)
Gm02	35221502	G	A	EFF=SYNONYMOUS_CODING(LOW|SILENT|ccG/ccA|P301|Glyma02g32000|mRNA||PAC:16248959|PAC:16248959.exon.2)
Gm02	35337694	G	A	EFF=DOWNSTREAM(MODIFIER||||Glyma02g32100|mRNA||PAC:16248967|)
Gm02	35670533	C	T	EFF=INTERGENIC(MODIFIER||||||||)
Gm02	35761347	C	T	EFF=INTERGENIC(MODIFIER||||||||)
Gm02	36030793	T	C	EFF=INTERGENIC(MODIFIER||||||||)
Gm02	36178312	C	T	EFF=INTERGENIC(MODIFIER||||||||)
Gm02	36299543	T	C	EFF=INTRON(MODIFIER||||Glyma02g32980|mRNA||PAC:16248976|)
Gm02	36438356	C	A	EFF=INTERGENIC(MODIFIER||||||||)
Gm02	36958805	A	G	EFF=INTRON(MODIFIER||||Glyma02g33110|mRNA||PAC:16248986|)
Gm02	36958840	C	T	EFF=SYNONYMOUS_CODING(LOW|SILENT|aaG/aaA|K155|Glyma02g33110|mRNA||PAC:16248986|PAC:16248986.exon.3)
Gm02	36958860	A	C	EFF=NON_SYNONYMOUS_CODING(MODERATE|MISSENSE|Tcc/Gcc|S149A|Glyma02g33110|mRNA||PAC:16248986|PAC:16248986.exon.3)
Gm02	36963382	A	G	EFF=UPSTREAM(MODIFIER||||Glyma02g33110|mRNA||PAC:16248986|)
Gm02	37573170	C	T	EFF=UPSTREAM(MODIFIER||||Glyma02g33770|mRNA||PAC:16248994|)
Gm02	37804424	G	A	EFF=INTERGENIC(MODIFIER||||||||)
Gm02	38426370	G	C	EFF=INTERGENIC(MODIFIER||||||||)
Gm02	38556606	G	A	EFF=INTERGENIC(MODIFIER||||||||)
Gm02	38580096	C	T	EFF=INTERGENIC(MODIFIER||||||||)
Gm02	38594611	C	T	EFF=INTERGENIC(MODIFIER||||||||)
Gm02	38787194	G	A	EFF=NON_SYNONYMOUS_CODING(MODERATE|MISSENSE|tCt/tTt|S47F|Glyma02g34570|mRNA||PAC:16249053|PAC:16249053.exon.1)
Gm02	38787206	C	T	EFF=NON_SYNONYMOUS_CODING(MODERATE|MISSENSE|cGa/cAa|R43Q|Glyma02g34570|mRNA||PAC:16249053|PAC:16249053.exon.1)
Gm02	38787222	T	C	EFF=NON_SYNONYMOUS_CODING(MODERATE|MISSENSE|Aat/Gat|N38D|Glyma02g34570|mRNA||PAC:16249053|PAC:16249053.exon.1)
Gm02	39096782	T	A	EFF=INTERGENIC(MODIFIER||||||||)
Gm02	39261168	A	G	EFF=INTRON(MODIFIER||||Glyma02g34760|mRNA||PAC:16249072|)
Gm02	39261207	A	G,T	EFF=INTRON(MODIFIER||||Glyma02g34760|mRNA||PAC:16249072|)
Gm02	39719105	C	T	EFF=INTERGENIC(MODIFIER||||||||)
Gm02	39719128	G	A	EFF=INTERGENIC(MODIFIER||||||||)
Gm02	39719171	A	G	EFF=INTERGENIC(MODIFIER||||||||)
Gm02	39878428	C	T	EFF=UPSTREAM(MODIFIER||||Glyma02g35160|mRNA||PAC:16249113|)
Gm02	40229434	C	A	EFF=INTERGENIC(MODIFIER||||||||)
Gm02	40447581	A	G	EFF=INTERGENIC(MODIFIER||||||||)
Gm02	40447627	C	A	EFF=INTERGENIC(MODIFIER||||||||)
Gm02	40486688	A	C	EFF=INTERGENIC(MODIFIER||||||||)
Gm02	40486710	T	C	EFF=INTERGENIC(MODIFIER||||||||)
Gm02	40958203	GACA	GA	EFF=INTERGENIC(MODIFIER||||||||)
Gm02	41020992	C	T	EFF=INTERGENIC(MODIFIER||||||||)
Gm02	41471534	G	A	EFF=NON_SYNONYMOUS_CODING(MODERATE|MISSENSE|Gcc/Acc|A186T|Glyma02g36090|mRNA||PAC:16249204|PAC:16249204.exon.1)
Gm02	41549952	G	A	EFF=SYNONYMOUS_CODING(LOW|SILENT|Cta/Tta|L40|Glyma02g36150|mRNA||PAC:16249208|PAC:16249208.exon.1)
Gm02	41785817	G	A	EFF=INTRON(MODIFIER||||Glyma02g36330|mRNA||PAC:16249228|)
Gm02	41787588	G	A	EFF=INTRON(MODIFIER||||Glyma02g36330|mRNA||PAC:16249228|)
Gm02	41930282	C	T	EFF=NON_SYNONYMOUS_CODING(MODERATE|MISSENSE|Gct/Act|A696T|Glyma02g36440|mRNA||PAC:16249241|PAC:16249241.exon.6)
Gm02	41995382	T	C	EFF=SYNONYMOUS_CODING(LOW|SILENT|gaT/gaC|D285|Glyma02g36510|mRNA||PAC:16249250|PAC:16249250.exon.3)
Gm02	42007033	T	C	EFF=NON_SYNONYMOUS_CODING(MODERATE|MISSENSE|Tat/Cat|Y69H|Glyma02g36520|mRNA||PAC:16249251|PAC:16249251.exon.1)
Gm02	42563960	T	C	EFF=NON_SYNONYMOUS_CODING(MODERATE|MISSENSE|cAg/cGg|Q100R|Glyma02g37220|mRNA||PAC:16249331|PAC:16249331.exon.2)
Gm02	42584657	C	T	EFF=INTERGENIC(MODIFIER||||||||)
Gm02	42584678	G	A	EFF=INTERGENIC(MODIFIER||||||||)
Gm02	42584692	G	T	EFF=INTERGENIC(MODIFIER||||||||)
Gm02	42632633	T	A	EFF=SYNONYMOUS_CODING(LOW|SILENT|tcA/tcT|S72|Glyma02g37310|mRNA||PAC:16249340|PAC:16249340.exon.2)
Gm02	42718749	A	C	EFF=DOWNSTREAM(MODIFIER||||Glyma02g37380|mRNA||PAC:16249347|)
Gm02	42718794	G	C	EFF=DOWNSTREAM(MODIFIER||||Glyma02g37380|mRNA||PAC:16249347|)
Gm02	42728011	T	A	EFF=DOWNSTREAM(MODIFIER||||Glyma02g37400|mRNA||PAC:16249349|),UPSTREAM(MODIFIER||||Glyma02g37380|mRNA||PAC:16249347|)
Gm02	42728024	A	C	EFF=DOWNSTREAM(MODIFIER||||Glyma02g37400|mRNA||PAC:16249349|),UPSTREAM(MODIFIER||||Glyma02g37380|mRNA||PAC:16249347|)
Gm02	42730846	C	T	EFF=DOWNSTREAM(MODIFIER||||Glyma02g37400|mRNA||PAC:16249349|)
Gm02	42855640	T	C	EFF=DOWNSTREAM(MODIFIER||||Glyma02g37520|mRNA||PAC:16249363|),NON_SYNONYMOUS_CODING(MODERATE|MISSENSE|aAg/aGg|K33R|Glyma02g37510|mRNA||PAC:16249362|PAC:16249362.exon.1)
Gm02	43043800	G	A	EFF=SYNONYMOUS_CODING(LOW|SILENT|gcC/gcT|A41|Glyma02g37680|mRNA||PAC:16249379|PAC:16249379.exon.1)
Gm02	43066500	G	A	EFF=SYNONYMOUS_CODING(LOW|SILENT|tgC/tgT|C114|Glyma02g37720|mRNA||PAC:16249384|PAC:16249384.exon.2)
Gm02	43066521	G	A	EFF=SYNONYMOUS_CODING(LOW|SILENT|gaC/gaT|D107|Glyma02g37720|mRNA||PAC:16249384|PAC:16249384.exon.2)
Gm02	43131328	G	A	EFF=UPSTREAM(MODIFIER||||Glyma02g37820|mRNA||PAC:16249394|)
Gm02	43532821	G	A	EFF=UPSTREAM(MODIFIER||||Glyma02g38210|mRNA||PAC:16249434|)
Gm02	43769854	C	T	EFF=SYNONYMOUS_CODING(LOW|SILENT|atC/atT|I167|Glyma02g38340|mRNA||PAC:16249455|PAC:16249455.exon.3),UPSTREAM(MODIFIER||||Glyma02g38350|mRNA||PAC:16249456|)
Gm02	43792438	C	T	EFF=UPSTREAM(MODIFIER||||Glyma02g38370|mRNA||PAC:16249458|),UPSTREAM(MODIFIER||||Glyma02g38380|mRNA||PAC:16249459|),UPSTREAM(MODIFIER||||Glyma02g38380|mRNA||PAC:16249460|)
Gm02	43869829	A	C	EFF=DOWNSTREAM(MODIFIER||||Glyma02g38450|mRNA||PAC:16249466|)
Gm02	43870374	G	T	EFF=INTRON(MODIFIER||||Glyma02g38450|mRNA||PAC:16249466|)
Gm02	43901564	C	A	EFF=DOWNSTREAM(MODIFIER||||Glyma02g38510|mRNA||PAC:16249472|),NON_SYNONYMOUS_CODING(MODERATE|MISSENSE|agC/agA|S422R|Glyma02g38500|mRNA||PAC:16249471|PAC:16249471.exon.8),NON_SYNONYMOUS_CODING(MODERATE|MISSENSE|agC/agA|S423R|Glyma02g38500|mRNA||PAC:16249470|PAC:16249470.exon.8)
Gm02	43958552	A	G	EFF=DOWNSTREAM(MODIFIER||||Glyma02g38560|mRNA||PAC:16249478|)
Gm02	43991225	T	C	EFF=INTRAGENIC(MODIFIER||||Glyma02g38590|mRNA|||)
Gm02	44010508	A	G	EFF=SYNONYMOUS_CODING(LOW|SILENT|acT/acC|T503|Glyma02g38650|mRNA||PAC:16249488|PAC:16249488.exon.1)
Gm02	44010671	A	G	EFF=NON_SYNONYMOUS_CODING(MODERATE|MISSENSE|cTg/cCg|L449P|Glyma02g38650|mRNA||PAC:16249488|PAC:16249488.exon.1)
Gm02	44173582	T	C	EFF=DOWNSTREAM(MODIFIER||||Glyma02g38810|mRNA||PAC:16249506|),DOWNSTREAM(MODIFIER||||Glyma02g38840|mRNA||PAC:16249509|),SYNONYMOUS_CODING(LOW|SILENT|ggT/ggC|G115|Glyma02g38830|mRNA||PAC:16249508|PAC:16249508.exon.2)
Gm02	44185350	T	A	EFF=NON_SYNONYMOUS_CODING(MODERATE|MISSENSE|Atg/Ttg|M516L|Glyma02g38840|mRNA||PAC:16249509|PAC:16249509.exon.6)
Gm02	44235632	CTTTTT	CTTTT	EFF=UPSTREAM(MODIFIER||||Glyma02g38880|mRNA||PAC:16249512|),UPSTREAM(MODIFIER||||Glyma02g38900|mRNA||PAC:16249514|)
Gm02	44252795	G	A	EFF=DOWNSTREAM(MODIFIER||||Glyma02g38940|mRNA||PAC:16249518|),SYNONYMOUS_CODING(LOW|SILENT|ttC/ttT|F493|Glyma02g38930|mRNA||PAC:16249517|PAC:16249517.exon.9),UPSTREAM(MODIFIER||||Glyma02g38920|mRNA||PAC:16249516|)
Gm02	44259240	C	T	EFF=UPSTREAM(MODIFIER||||Glyma02g38930|mRNA||PAC:16249517|),UPSTREAM(MODIFIER||||Glyma02g38940|mRNA||PAC:16249518|),UPSTREAM(MODIFIER||||Glyma02g38940|mRNA||PAC:16249519|)
Gm02	44339628	C	T	EFF=INTRON(MODIFIER||||Glyma02g39040|mRNA||PAC:16249530|)
Gm02	44398662	C	T	EFF=SYNONYMOUS_CODING(LOW|SILENT|gcC/gcT|A454|Glyma02g39130|mRNA||PAC:16249540|PAC:16249540.exon.10)
Gm02	44417687	C	A	EFF=NON_SYNONYMOUS_CODING(MODERATE|MISSENSE|Gca/Tca|A238S|Glyma02g39150|mRNA||PAC:16249542|PAC:16249542.exon.5)
Gm02	44518756	G	GC	EFF=DOWNSTREAM(MODIFIER||||Glyma02g39280|mRNA||PAC:16249556|),DOWNSTREAM(MODIFIER||||Glyma02g39280|mRNA||PAC:16249557|),FRAME_SHIFT(HIGH||||Glyma02g39260|mRNA||PAC:16249554|PAC:16249554.exon.7),UPSTREAM(MODIFIER||||Glyma02g39270|mRNA||PAC:16249555|)
Gm02	44665111	CAGAGAGAGAGAGAGAGAG	CAGAGAGAGAGAGAGAG	EFF=UPSTREAM(MODIFIER||||Glyma02g39360|mRNA||PAC:16249568|)
Gm02	44832303	A	G	EFF=NON_SYNONYMOUS_CODING(MODERATE|MISSENSE|Att/Gtt|I149V|Glyma02g39540|mRNA||PAC:16249586|PAC:16249586.exon.5)
Gm02	44847692	C	G	EFF=START_GAINED(LOW||||Glyma02g39570|mRNA||PAC:16249589|PAC:16249589.exon.1)
Gm02	44847696	T	C	EFF=UTR_5_PRIME(MODIFIER||||Glyma02g39570|mRNA||PAC:16249589|PAC:16249589.exon.1)
Gm02	44910216	A	G	EFF=DOWNSTREAM(MODIFIER||||Glyma02g39660|mRNA||PAC:16249598|),DOWNSTREAM(MODIFIER||||Glyma02g39660|mRNA||PAC:16249599|)
Gm02	44925951	G	A	EFF=DOWNSTREAM(MODIFIER||||Glyma02g39680|mRNA||PAC:16249601|),INTRAGENIC(MODIFIER||||Glyma02g39700|mRNA|||),UPSTREAM(MODIFIER||||Glyma02g39710|mRNA||PAC:16249604|)
Gm02	44937754	A	T	EFF=DOWNSTREAM(MODIFIER||||Glyma02g39710|mRNA||PAC:16249604|),INTRON(MODIFIER||||Glyma02g39720|mRNA||PAC:16249605|)
Gm02	45127867	C	T	EFF=UPSTREAM(MODIFIER||||Glyma02g39910|mRNA||PAC:16249623|)
Gm02	45127895	G	A	EFF=UPSTREAM(MODIFIER||||Glyma02g39910|mRNA||PAC:16249623|)
Gm02	45219291	A	C	EFF=NON_SYNONYMOUS_CODING(MODERATE|MISSENSE|Tcg/Gcg|S225A|Glyma02g40020|mRNA||PAC:16249634|PAC:16249634.exon.3)
Gm02	45226874	G	A	EFF=DOWNSTREAM(MODIFIER||||Glyma02g40030|mRNA||PAC:16249635|),DOWNSTREAM(MODIFIER||||Glyma02g40030|mRNA||PAC:16249636|),UPSTREAM(MODIFIER||||Glyma02g40020|mRNA||PAC:16249634|)
Gm02	45228882	G	A	EFF=INTRON(MODIFIER||||Glyma02g40030|mRNA||PAC:16249635|),INTRON(MODIFIER||||Glyma02g40030|mRNA||PAC:16249636|)
Gm02	45259782	G	C	EFF=SYNONYMOUS_CODING(LOW|SILENT|ctG/ctC|L81|Glyma02g40060|mRNA||PAC:16249639|PAC:16249639.exon.1)
Gm02	45368057	C	T	EFF=DOWNSTREAM(MODIFIER||||Glyma02g40180|mRNA||PAC:16249651|),SYNONYMOUS_CODING(LOW|SILENT|ggC/ggT|G280|Glyma02g40170|mRNA||PAC:16249650|PAC:16249650.exon.2)
Gm02	45445029	T	C	EFF=INTRON(MODIFIER||||Glyma02g40270|mRNA||PAC:16249661|)
Gm02	45598105	C	T	EFF=NON_SYNONYMOUS_CODING(MODERATE|MISSENSE|Gcg/Acg|A363T|Glyma02g40360|mRNA||PAC:16249672|PAC:16249672.exon.3)
Gm02	45598187	T	C	EFF=SYNONYMOUS_CODING(LOW|SILENT|agA/agG|R335|Glyma02g40360|mRNA||PAC:16249672|PAC:16249672.exon.3)
Gm02	45598544	A	C	EFF=SYNONYMOUS_CODING(LOW|SILENT|gcT/gcG|A216|Glyma02g40360|mRNA||PAC:16249672|PAC:16249672.exon.3)
Gm02	45598556	G	A	EFF=SYNONYMOUS_CODING(LOW|SILENT|acC/acT|T212|Glyma02g40360|mRNA||PAC:16249672|PAC:16249672.exon.3)
Gm02	45598771	C	T	EFF=NON_SYNONYMOUS_CODING(MODERATE|MISSENSE|Gtt/Att|V141I|Glyma02g40360|mRNA||PAC:16249672|PAC:16249672.exon.3)
Gm02	45740450	C	A	EFF=INTERGENIC(MODIFIER||||||||)
Gm02	45817453	T	C	EFF=DOWNSTREAM(MODIFIER||||Glyma02g40550|mRNA||PAC:16249697|),UPSTREAM(MODIFIER||||Glyma02g40570|mRNA||PAC:16249699|)
Gm02	45910362	G	A	EFF=DOWNSTREAM(MODIFIER||||Glyma02g40660|mRNA||PAC:16249709|)
Gm02	45958624	A	G	EFF=START_GAINED(LOW||||Glyma02g40730|mRNA||PAC:16249716|PAC:16249716.exon.1)
Gm02	46037612	A	C	EFF=DOWNSTREAM(MODIFIER||||Glyma02g40810|mRNA||PAC:16249725|),UPSTREAM(MODIFIER||||Glyma02g40820|mRNA||PAC:16249728|),UPSTREAM(MODIFIER||||Glyma02g40820|mRNA||PAC:16249729|),UTR_5_PRIME(MODIFIER||||Glyma02g40820|mRNA||PAC:16249726|PAC:16249726.exon.1),UTR_5_PRIME(MODIFIER||||Glyma02g40820|mRNA||PAC:16249727|PAC:16249727.exon.1)
Gm02	46068657	G	C	EFF=DOWNSTREAM(MODIFIER||||Glyma02g40840|mRNA||PAC:16249731|),NON_SYNONYMOUS_CODING(MODERATE|MISSENSE|tCg/tGg|S555W|Glyma02g40850|mRNA||PAC:16249732|PAC:16249732.exon.3)
Gm02	46148228	T	C	EFF=SYNONYMOUS_CODING(LOW|SILENT|gaT/gaC|D163|Glyma02g40930|mRNA||PAC:16249740|PAC:16249740.exon.1),UPSTREAM(MODIFIER||||Glyma02g40930|mRNA||PAC:16249741|)
Gm02	46187716	G	A	EFF=NON_SYNONYMOUS_CODING(MODERATE|MISSENSE|gGc/gAc|G128D|Glyma02g40980|mRNA||PAC:16249747|PAC:16249747.exon.1)
Gm02	46442064	A	G	EFF=NON_SYNONYMOUS_CODING(MODERATE|MISSENSE|Aca/Gca|T106A|Glyma02g41270|mRNA||PAC:16249777|PAC:16249777.exon.1)
Gm02	46712559	C	T	EFF=INTERGENIC(MODIFIER||||||||)
Gm02	46931507	T	C	EFF=DOWNSTREAM(MODIFIER||||Glyma02g41850|mRNA||PAC:16249841|),INTRON(MODIFIER||||Glyma02g41830|mRNA||PAC:16249838|),UPSTREAM(MODIFIER||||Glyma02g41840|mRNA||PAC:16249839|),UPSTREAM(MODIFIER||||Glyma02g41840|mRNA||PAC:16249840|)
Gm02	46975391	C	T	EFF=START_GAINED(LOW||||Glyma02g41900|mRNA||PAC:16249847|PAC:16249847.exon.1),UPSTREAM(MODIFIER||||Glyma02g41890|mRNA||PAC:16249845|),UPSTREAM(MODIFIER||||Glyma02g41890|mRNA||PAC:16249846|)
Gm02	47034632	C	A	EFF=INTERGENIC(MODIFIER||||||||)
Gm02	47034643	T	G	EFF=INTERGENIC(MODIFIER||||||||)
Gm02	47170275	G	A	EFF=DOWNSTREAM(MODIFIER||||Glyma02g42080|mRNA||PAC:16249866|),DOWNSTREAM(MODIFIER||||Glyma02g42080|mRNA||PAC:16249867|),DOWNSTREAM(MODIFIER||||Glyma02g42100|mRNA||PAC:16249870|),INTRON(MODIFIER||||Glyma02g42090|mRNA||PAC:16249868|),INTRON(MODIFIER||||Glyma02g42090|mRNA||PAC:16249869|)
Gm02	47334329	G	T	EFF=START_GAINED(LOW||||Glyma02g42270|mRNA||PAC:16249893|PAC:16249893.exon.1),UPSTREAM(MODIFIER||||Glyma02g42260|mRNA||PAC:16249891|),UPSTREAM(MODIFIER||||Glyma02g42260|mRNA||PAC:16249892|),UPSTREAM(MODIFIER||||Glyma02g42280|mRNA||PAC:16249894|)
Gm02	47340702	A	C	EFF=DOWNSTREAM(MODIFIER||||Glyma02g42280|mRNA||PAC:16249894|)
Gm02	47394560	G	A	EFF=DOWNSTREAM(MODIFIER||||Glyma02g42360|mRNA||PAC:16249903|),DOWNSTREAM(MODIFIER||||Glyma02g42360|mRNA||PAC:16249904|),DOWNSTREAM(MODIFIER||||Glyma02g42360|mRNA||PAC:16249905|),DOWNSTREAM(MODIFIER||||Glyma02g42360|mRNA||PAC:16249906|),DOWNSTREAM(MODIFIER||||Glyma02g42360|mRNA||PAC:16249907|),SYNONYMOUS_CODING(LOW|SILENT|caC/caT|H21|Glyma02g42350|mRNA||PAC:16249902|PAC:16249902.exon.1)
Gm02	47529787	C	T	EFF=INTERGENIC(MODIFIER||||||||)
Gm02	47584581	G	A	EFF=INTERGENIC(MODIFIER||||||||)
Gm02	47794998	GTTTTTTTTT	GTTTTTTTT	EFF=DOWNSTREAM(MODIFIER||||Glyma02g42830|mRNA||PAC:16249954|),INTRON(MODIFIER||||Glyma02g42840|mRNA||PAC:16249955|),INTRON(MODIFIER||||Glyma02g42840|mRNA||PAC:16249956|),UPSTREAM(MODIFIER||||Glyma02g42850|mRNA||PAC:16249957|)
Gm02	47921678	G	A	EFF=SYNONYMOUS_CODING(LOW|SILENT|gaC/gaT|D126|Glyma02g43030|mRNA||PAC:16249977|PAC:16249977.exon.2)
Gm02	47924184	C	T	EFF=UPSTREAM(MODIFIER||||Glyma02g43030|mRNA||PAC:16249977|)
Gm02	47992007	G	A	EFF=UPSTREAM(MODIFIER||||Glyma02g43110|mRNA||PAC:16249988|),UPSTREAM(MODIFIER||||Glyma02g43120|mRNA||PAC:16249989|),UPSTREAM(MODIFIER||||Glyma02g43130|mRNA||PAC:16249990|)
Gm02	48024428	G	A	EFF=SYNONYMOUS_CODING(LOW|SILENT|gtC/gtT|V494|Glyma02g43190|mRNA||PAC:16249996|PAC:16249996.exon.3),UPSTREAM(MODIFIER||||Glyma02g43180|mRNA||PAC:16249995|)
Gm02	48184303	G	C	EFF=INTRON(MODIFIER||||Glyma02g43410|mRNA||PAC:16250019|)
Gm02	48217478	A	C	EFF=DOWNSTREAM(MODIFIER||||Glyma02g43440|mRNA||PAC:16250022|),DOWNSTREAM(MODIFIER||||Glyma02g43460|mRNA||PAC:16250024|),INTRON(MODIFIER||||Glyma02g43450|mRNA||PAC:16250023|)
Gm02	48231762	A	G	EFF=DOWNSTREAM(MODIFIER||||Glyma02g43490|mRNA||PAC:16250027|),DOWNSTREAM(MODIFIER||||Glyma02g43490|mRNA||PAC:16250028|),INTRON(MODIFIER||||Glyma02g43480|mRNA||PAC:16250026|),UPSTREAM(MODIFIER||||Glyma02g43470|mRNA||PAC:16250025|)
Gm02	48325873	T	A	EFF=UPSTREAM(MODIFIER||||Glyma02g43550|mRNA||PAC:16250036|),UPSTREAM(MODIFIER||||Glyma02g43550|mRNA||PAC:16250037|)
Gm02	48342029	A	G	EFF=SYNONYMOUS_CODING(LOW|SILENT|Tta/Cta|L11|Glyma02g43560|mRNA||PAC:16250039|PAC:16250039.exon.2),SYNONYMOUS_CODING(LOW|SILENT|Tta/Cta|L11|Glyma02g43560|mRNA||PAC:16250040|PAC:16250040.exon.1),SYNONYMOUS_CODING(LOW|SILENT|Tta/Cta|L124|Glyma02g43560|mRNA||PAC:16250038|PAC:16250038.exon.3),SYNONYMOUS_CODING(LOW|SILENT|Tta/Cta|L124|Glyma02g43560|mRNA||PAC:16250042|PAC:16250042.exon.3),SYNONYMOUS_CO…
Gm02	48378120	T	C	EFF=DOWNSTREAM(MODIFIER||||Glyma02g43610|mRNA||PAC:16250047|),DOWNSTREAM(MODIFIER||||Glyma02g43610|mRNA||PAC:16250048|),DOWNSTREAM(MODIFIER||||Glyma02g43610|mRNA||PAC:16250049|),INTRON(MODIFIER||||Glyma02g43620|mRNA||PAC:16250050|),UPSTREAM(MODIFIER||||Glyma02g43630|mRNA||PAC:16250051|)
Gm02	48634267	C	T	EFF=DOWNSTREAM(MODIFIER||||Glyma02g43940|mRNA||PAC:16250086|),INTRON(MODIFIER||||Glyma02g43950|mRNA||PAC:16250087|)
Gm02	48634274	A	T	EFF=DOWNSTREAM(MODIFIER||||Glyma02g43940|mRNA||PAC:16250086|),INTRON(MODIFIER||||Glyma02g43950|mRNA||PAC:16250087|)
Gm02	48634288	T	C	EFF=DOWNSTREAM(MODIFIER||||Glyma02g43940|mRNA||PAC:16250086|),INTRON(MODIFIER||||Glyma02g43950|mRNA||PAC:16250087|)
Gm02	48760928	G	C	EFF=DOWNSTREAM(MODIFIER||||Glyma02g44080|mRNA||PAC:16250105|),DOWNSTREAM(MODIFIER||||Glyma02g44090|mRNA||PAC:16250106|),DOWNSTREAM(MODIFIER||||Glyma02g44090|mRNA||PAC:16250107|)
Gm02	48820932	T	C	EFF=SYNONYMOUS_CODING(LOW|SILENT|ctT/ctC|L28|Glyma02g44190|mRNA||PAC:16250117|PAC:16250117.exon.2)
Gm02	48885733	C	T	EFF=DOWNSTREAM(MODIFIER||||Glyma02g44260|mRNA||PAC:16250125|),DOWNSTREAM(MODIFIER||||Glyma02g44280|mRNA||PAC:16250127|),INTRON(MODIFIER||||Glyma02g44270|mRNA||PAC:16250126|)
Gm02	48910809	A	T	EFF=DOWNSTREAM(MODIFIER||||Glyma02g44330|mRNA||PAC:16250132|),DOWNSTREAM(MODIFIER||||Glyma02g44330|mRNA||PAC:16250133|),DOWNSTREAM(MODIFIER||||Glyma02g44330|mRNA||PAC:16250134|),UPSTREAM(MODIFIER||||Glyma02g44310|mRNA||PAC:16250130|)
Gm02	49075959	G	C	EFF=INTRON(MODIFIER||||Glyma02g44530|mRNA||PAC:16250163|),UPSTREAM(MODIFIER||||Glyma02g44530|mRNA||PAC:16250164|)
Gm02	49075960	G	C	EFF=INTRON(MODIFIER||||Glyma02g44530|mRNA||PAC:16250163|),UPSTREAM(MODIFIER||||Glyma02g44530|mRNA||PAC:16250164|)
Gm02	49372484	A	T	EFF=DOWNSTREAM(MODIFIER||||Glyma02g44930|mRNA||PAC:16250215|)
Gm02	49482166	A	C	EFF=SYNONYMOUS_CODING(LOW|SILENT|gcA/gcC|A116|Glyma02g45100|mRNA||PAC:16250234|PAC:16250234.exon.5)
Gm02	49505256	A	T	EFF=DOWNSTREAM(MODIFIER||||Glyma02g45120|mRNA||PAC:16250236|),SYNONYMOUS_CODING(LOW|SILENT|cgT/cgA|R486|Glyma02g45140|mRNA||PAC:16250238|PAC:16250238.exon.10)
Gm02	49505295	C	T	EFF=DOWNSTREAM(MODIFIER||||Glyma02g45120|mRNA||PAC:16250236|),SYNONYMOUS_CODING(LOW|SILENT|ccG/ccA|P473|Glyma02g45140|mRNA||PAC:16250238|PAC:16250238.exon.10)
Gm02	49516752	T	C	EFF=SYNONYMOUS_CODING(LOW|SILENT|caA/caG|Q523|Glyma02g45150|mRNA||PAC:16250239|PAC:16250239.exon.8),SYNONYMOUS_CODING(LOW|SILENT|caA/caG|Q523|Glyma02g45150|mRNA||PAC:16250240|PAC:16250240.exon.8)
Gm02	49672356	T	C	EFF=INTRON(MODIFIER||||Glyma02g45380|mRNA||PAC:16250265|),UPSTREAM(MODIFIER||||Glyma02g45390|mRNA||PAC:16250266|)
Gm02	49690231	C	T	EFF=INTRAGENIC(MODIFIER||||Glyma02g45410|mRNA|||)
Gm02	49690251	A	G	EFF=INTRAGENIC(MODIFIER||||Glyma02g45410|mRNA|||)
Gm02	49690428	A	G	EFF=INTRAGENIC(MODIFIER||||Glyma02g45410|mRNA|||)
Gm02	49726362	C	A	EFF=UPSTREAM(MODIFIER||||Glyma02g45470|mRNA||PAC:16250274|),UPSTREAM(MODIFIER||||Glyma02g45480|mRNA||PAC:16250275|)
Gm02	49734597	C	G	EFF=SYNONYMOUS_CODING(LOW|SILENT|cgC/cgG|R153|Glyma02g45500|mRNA||PAC:16250277|PAC:16250277.exon.2),SYNONYMOUS_CODING(LOW|SILENT|cgC/cgG|R153|Glyma02g45500|mRNA||PAC:16250278|PAC:16250278.exon.2)
Gm02	49792568	G	C	EFF=DOWNSTREAM(MODIFIER||||Glyma02g45580|mRNA||PAC:16250286|),DOWNSTREAM(MODIFIER||||Glyma02g45590|mRNA||PAC:16250287|)
Gm02	49792582	G	A	EFF=DOWNSTREAM(MODIFIER||||Glyma02g45580|mRNA||PAC:16250286|),DOWNSTREAM(MODIFIER||||Glyma02g45590|mRNA||PAC:16250287|)
Gm02	49792604	A	C	EFF=DOWNSTREAM(MODIFIER||||Glyma02g45580|mRNA||PAC:16250286|),DOWNSTREAM(MODIFIER||||Glyma02g45590|mRNA||PAC:16250287|)
Gm02	49796648	A	T	EFF=DOWNSTREAM(MODIFIER||||Glyma02g45580|mRNA||PAC:16250286|),DOWNSTREAM(MODIFIER||||Glyma02g45600|mRNA||PAC:16250288|),SYNONYMOUS_CODING(LOW|SILENT|atT/atA|I101|Glyma02g45590|mRNA||PAC:16250287|PAC:16250287.exon.2)
Gm02	50209812	G	A	EFF=INTRON(MODIFIER||||Glyma02g46180|mRNA||PAC:16250367|)
Gm02	50209823	C	T	EFF=INTRON(MODIFIER||||Glyma02g46180|mRNA||PAC:16250367|)
Gm02	50210786	A	G	EFF=INTRON(MODIFIER||||Glyma02g46180|mRNA||PAC:16250367|)
Gm02	50241296	A	G	EFF=DOWNSTREAM(MODIFIER||||Glyma02g46200|mRNA||PAC:16250369|),DOWNSTREAM(MODIFIER||||Glyma02g46220|mRNA||PAC:16250371|),DOWNSTREAM(MODIFIER||||Glyma02g46230|mRNA||PAC:16250372|),SYNONYMOUS_CODING(LOW|SILENT|gcA/gcG|A85|Glyma02g46210|mRNA||PAC:16250370|PAC:16250370.exon.1)
Gm02	50242535	T	C	EFF=DOWNSTREAM(MODIFIER||||Glyma02g46200|mRNA||PAC:16250369|),DOWNSTREAM(MODIFIER||||Glyma02g46210|mRNA||PAC:16250370|),DOWNSTREAM(MODIFIER||||Glyma02g46230|mRNA||PAC:16250372|),SYNONYMOUS_CODING(LOW|SILENT|gcA/gcG|A184|Glyma02g46220|mRNA||PAC:16250371|PAC:16250371.exon.1)
Gm02	50269494	G	C	EFF=UPSTREAM(MODIFIER||||Glyma02g46250|mRNA||PAC:16250374|),UPSTREAM(MODIFIER||||Glyma02g46260|mRNA||PAC:16250375|)
Gm02	50351301	G	A	EFF=DOWNSTREAM(MODIFIER||||Glyma02g46380|mRNA||PAC:16250388|),DOWNSTREAM(MODIFIER||||Glyma02g46380|mRNA||PAC:16250389|)
Gm02	50351343	G	A	EFF=DOWNSTREAM(MODIFIER||||Glyma02g46380|mRNA||PAC:16250388|),DOWNSTREAM(MODIFIER||||Glyma02g46380|mRNA||PAC:16250389|)
Gm02	50533066	T	C	EFF=SYNONYMOUS_CODING(LOW|SILENT|gaA/gaG|E817|Glyma02g46630|mRNA||PAC:16250421|PAC:16250421.exon.16),UPSTREAM(MODIFIER||||Glyma02g46620|mRNA||PAC:16250420|)
Gm02	50543068	T	C	EFF=UPSTREAM(MODIFIER||||Glyma02g46640|mRNA||PAC:16250422|)
Gm02	50607118	A	G	EFF=DOWNSTREAM(MODIFIER||||Glyma02g46760|mRNA||PAC:16250435|),NON_SYNONYMOUS_CODING(MODERATE|MISSENSE|Agg/Ggg|R32G|Glyma02g46750|mRNA||PAC:16250434|PAC:16250434.exon.1),UPSTREAM(MODIFIER||||Glyma02g46740|mRNA||PAC:16250433|)
Gm02	50758536	T	C	EFF=DOWNSTREAM(MODIFIER||||Glyma02g46970|mRNA||PAC:16250458|),DOWNSTREAM(MODIFIER||||Glyma02g46980|mRNA||PAC:16250459|),DOWNSTREAM(MODIFIER||||Glyma02g46990|mRNA||PAC:16250460|),DOWNSTREAM(MODIFIER||||Glyma02g47000|mRNA||PAC:16250461|)
Gm02	50953518	C	T	EFF=DOWNSTREAM(MODIFIER||||Glyma02g47340|mRNA||PAC:16250497|),UPSTREAM(MODIFIER||||Glyma02g47350|mRNA||PAC:16250498|)
Gm02	51070210	C	G	EFF=SYNONYMOUS_CODING(LOW|SILENT|cgC/cgG|R46|Glyma02g47500|mRNA||PAC:16250517|PAC:16250517.exon.1),UPSTREAM(MODIFIER||||Glyma02g47510|mRNA||PAC:16250518|)
Gm02	51169269	G	T	EFF=DOWNSTREAM(MODIFIER||||Glyma02g47650|mRNA||PAC:16250536|),SYNONYMOUS_CODING(LOW|SILENT|tcG/tcT|S82|Glyma02g47640|mRNA||PAC:16250534|PAC:16250534.exon.2),SYNONYMOUS_CODING(LOW|SILENT|tcG/tcT|S82|Glyma02g47640|mRNA||PAC:16250535|PAC:16250535.exon.3)
Gm02	51255348	C	T	EFF=SYNONYMOUS_CODING(LOW|SILENT|aaG/aaA|K90|Glyma02g47770|mRNA||PAC:16250553|PAC:16250553.exon.2),UPSTREAM(MODIFIER||||Glyma02g47760|mRNA||PAC:16250551|),UPSTREAM(MODIFIER||||Glyma02g47760|mRNA||PAC:16250552|)
Gm02	51255374	T	C	EFF=NON_SYNONYMOUS_CODING(MODERATE|MISSENSE|Atc/Gtc|I82V|Glyma02g47770|mRNA||PAC:16250553|PAC:16250553.exon.2),UPSTREAM(MODIFIER||||Glyma02g47760|mRNA||PAC:16250551|),UPSTREAM(MODIFIER||||Glyma02g47760|mRNA||PAC:16250552|)
Gm02	51302805	TAAAAAAAAA	TAAAAAAAAAA	EFF=DOWNSTREAM(MODIFIER||||Glyma02g47860|mRNA||PAC:16250564|),DOWNSTREAM(MODIFIER||||Glyma02g47860|mRNA||PAC:16250565|),INTRON(MODIFIER||||Glyma02g47850|mRNA||PAC:16250562|),INTRON(MODIFIER||||Glyma02g47850|mRNA||PAC:16250563|),UPSTREAM(MODIFIER||||Glyma02g47840|mRNA||PAC:16250561|)
Gm02	51313231	G	T	EFF=NON_SYNONYMOUS_CODING(MODERATE|MISSENSE|Ctg/Atg|L613M|Glyma02g47870|mRNA||PAC:16250566|PAC:16250566.exon.19)
Gm02	51313294	C	T	EFF=NON_SYNONYMOUS_CODING(MODERATE|MISSENSE|Gct/Act|A592T|Glyma02g47870|mRNA||PAC:16250566|PAC:16250566.exon.19)
Gm02	51313300	C	T	EFF=NON_SYNONYMOUS_CODING(MODERATE|MISSENSE|Gca/Aca|A590T|Glyma02g47870|mRNA||PAC:16250566|PAC:16250566.exon.19)
Gm02	51361026	A	G	EFF=INTRON(MODIFIER||||Glyma02g47930|mRNA||PAC:16250572|)
Gm02	51431811	T	A	EFF=NON_SYNONYMOUS_CODING(MODERATE|MISSENSE|Act/Tct|T759S|Glyma02g48040|mRNA||PAC:16250583|PAC:16250583.exon.4),UPSTREAM(MODIFIER||||Glyma02g48030|mRNA||PAC:16250582|)
Gm02	51434666	C	T	EFF=INTRON(MODIFIER||||Glyma02g48040|mRNA||PAC:16250583|)
Gm02	51489141	T	C	EFF=INTRON(MODIFIER||||Glyma02g48070|mRNA||PAC:16250586|)
Gm02	51504776	G	A	EFF=INTRON(MODIFIER||||Glyma02g48070|mRNA||PAC:16250586|)
Gm02	51537028	A	G	EFF=DOWNSTREAM(MODIFIER||||Glyma02g48100|mRNA||PAC:16250589|),SYNONYMOUS_CODING(LOW|SILENT|agT/agC|S162|Glyma02g48090|mRNA||PAC:16250588|PAC:16250588.exon.1)
Gm02	51550009	CTT	CTTT	EFF=INTERGENIC(MODIFIER||||||||)
Gm02	51550018	C	A	EFF=INTERGENIC(MODIFIER||||||||)
Gm03	395538	G	A	EFF=NON_SYNONYMOUS_CODING(MODERATE|MISSENSE|Gtg/Atg|V144M|Glyma03g00680|mRNA||PAC:16250683|PAC:16250683.exon.2)
Gm03	515239	A	G	EFF=INTERGENIC(MODIFIER||||||||)
Gm03	515244	CAAAA	CAAA	EFF=INTERGENIC(MODIFIER||||||||)
Gm03	529331	T	C	EFF=UPSTREAM(MODIFIER||||Glyma03g00800|mRNA||PAC:16250698|)
Gm03	561633	G	T	EFF=INTRON(MODIFIER||||Glyma03g00840|mRNA||PAC:16250703|),UPSTREAM(MODIFIER||||Glyma03g00850|mRNA||PAC:16250704|)
Gm03	567799	C	G	EFF=INTRON(MODIFIER||||Glyma03g00850|mRNA||PAC:16250704|)
Gm03	567833	C	T	EFF=INTRON(MODIFIER||||Glyma03g00850|mRNA||PAC:16250704|)
Gm03	571734	A	C	EFF=SYNONYMOUS_CODING(LOW|SILENT|tcA/tcC|S357|Glyma03g00850|mRNA||PAC:16250704|PAC:16250704.exon.7)
Gm03	578797	T	C	EFF=DOWNSTREAM(MODIFIER||||Glyma03g00850|mRNA||PAC:16250704|),INTRAGENIC(MODIFIER||||Glyma03g00860|mRNA|||)
Gm03	661625	G	C	EFF=UPSTREAM(MODIFIER||||Glyma03g00950|mRNA||PAC:16250714|),UTR_5_PRIME(MODIFIER||||Glyma03g00960|mRNA||PAC:16250715|PAC:16250715.exon.1)
Gm03	661629	G	T	EFF=START_GAINED(LOW||||Glyma03g00960|mRNA||PAC:16250715|PAC:16250715.exon.1),UPSTREAM(MODIFIER||||Glyma03g00950|mRNA||PAC:16250714|)
Gm03	669591	A	G	EFF=UTR_3_PRIME(MODIFIER||||Glyma03g00970|mRNA||PAC:16250716|PAC:16250716.exon.3)
Gm03	750178	C	A	EFF=SYNONYMOUS_CODING(LOW|SILENT|ctG/ctT|L252|Glyma03g01020|mRNA||PAC:16250721|PAC:16250721.exon.2)
Gm03	1091188	G	A	EFF=INTERGENIC(MODIFIER||||||||)
Gm03	1091242	C	G	EFF=INTERGENIC(MODIFIER||||||||)
Gm03	1194169	A	T	EFF=INTERGENIC(MODIFIER||||||||)
Gm03	1351565	C	T	EFF=NON_SYNONYMOUS_CODING(MODERATE|MISSENSE|cCt/cTt|P244L|Glyma03g01560|mRNA||PAC:16250786|PAC:16250786.exon.6)
Gm03	1385082	G	A	EFF=DOWNSTREAM(MODIFIER||||Glyma03g01590|mRNA||PAC:16250789|),INTRAGENIC(MODIFIER||||Glyma03g01600|mRNA|||)
Gm03	1389802	A	G	EFF=INTRAGENIC(MODIFIER||||Glyma03g01600|mRNA|||)
Gm03	1390041	A	G	EFF=INTRAGENIC(MODIFIER||||Glyma03g01600|mRNA|||)
Gm03	1445424	TC	T	EFF=INTRON(MODIFIER||||Glyma03g01680|mRNA||PAC:16250797|)
Gm03	1506283	A	T	EFF=DOWNSTREAM(MODIFIER||||Glyma03g01750|mRNA||PAC:16250804|),DOWNSTREAM(MODIFIER||||Glyma03g01750|mRNA||PAC:16250805|)
Gm03	1514369	C	T	EFF=DOWNSTREAM(MODIFIER||||Glyma03g01770|mRNA||PAC:16250807|),DOWNSTREAM(MODIFIER||||Glyma03g01770|mRNA||PAC:16250808|),SYNONYMOUS_CODING(LOW|SILENT|Cta/Tta|L11|Glyma03g01760|mRNA||PAC:16250806|PAC:16250806.exon.1),UPSTREAM(MODIFIER||||Glyma03g01750|mRNA||PAC:16250804|),UPSTREAM(MODIFIER||||Glyma03g01750|mRNA||PAC:16250805|)
Gm03	1516169	G	A	EFF=DOWNSTREAM(MODIFIER||||Glyma03g01770|mRNA||PAC:16250807|),DOWNSTREAM(MODIFIER||||Glyma03g01770|mRNA||PAC:16250808|),INTRON(MODIFIER||||Glyma03g01760|mRNA||PAC:16250806|),UPSTREAM(MODIFIER||||Glyma03g01750|mRNA||PAC:16250804|),UPSTREAM(MODIFIER||||Glyma03g01750|mRNA||PAC:16250805|)
Gm03	1671247	G	A	EFF=INTRON(MODIFIER||||Glyma03g01880|mRNA||PAC:16250819|),INTRON(MODIFIER||||Glyma03g01880|mRNA||PAC:16250820|),UPSTREAM(MODIFIER||||Glyma03g01870|mRNA||PAC:16250818|)
Gm03	1866786	A	C	EFF=NON_SYNONYMOUS_CODING(MODERATE|MISSENSE|Atg/Ctg|M215L|Glyma03g02090|mRNA||PAC:16250847|PAC:16250847.exon.1)
Gm03	1975903	ACCCCCCC	ACCCCCCCC	EFF=UPSTREAM(MODIFIER||||Glyma03g02210|mRNA||PAC:16250860|)
Gm03	2041978	CA	C	EFF=FRAME_SHIFT(HIGH||||Glyma03g02270|mRNA||PAC:16250866|PAC:16250866.exon.2)
Gm03	2042036	T	C	EFF=UTR_5_PRIME(MODIFIER||||Glyma03g02270|mRNA||PAC:16250866|PAC:16250866.exon.2)
Gm03	2042098	G	A	EFF=UTR_5_PRIME(MODIFIER||||Glyma03g02270|mRNA||PAC:16250866|PAC:16250866.exon.2)
Gm03	2042127	C	T	EFF=START_GAINED(LOW||||Glyma03g02270|mRNA||PAC:16250866|PAC:16250866.exon.2)
Gm03	2349140	T	C	EFF=SYNONYMOUS_CODING(LOW|SILENT|ccA/ccG|P253|Glyma03g02580|mRNA||PAC:16250899|PAC:16250899.exon.1)
Gm03	2349143	G	T	EFF=SYNONYMOUS_CODING(LOW|SILENT|tcC/tcA|S252|Glyma03g02580|mRNA||PAC:16250899|PAC:16250899.exon.1)
Gm03	2349210	T	C	EFF=NON_SYNONYMOUS_CODING(MODERATE|MISSENSE|tAt/tGt|Y230C|Glyma03g02580|mRNA||PAC:16250899|PAC:16250899.exon.1)
Gm03	2401432	T	C	EFF=NON_SYNONYMOUS_CODING(MODERATE|MISSENSE|Aac/Gac|N1510D|Glyma03g02610|mRNA||PAC:16250902|PAC:16250902.exon.10),UPSTREAM(MODIFIER||||Glyma03g02590|mRNA||PAC:16250900|)
Gm03	2401552	T	C	EFF=NON_SYNONYMOUS_CODING(MODERATE|MISSENSE|Att/Gtt|I1470V|Glyma03g02610|mRNA||PAC:16250902|PAC:16250902.exon.10),UPSTREAM(MODIFIER||||Glyma03g02590|mRNA||PAC:16250900|)
Gm03	2460430	A	G	EFF=INTERGENIC(MODIFIER||||||||)
Gm03	2713341	T	A	EFF=INTERGENIC(MODIFIER||||||||)
Gm03	2713366	C	T	EFF=INTERGENIC(MODIFIER||||||||)
Gm03	2717075	C	T	EFF=INTERGENIC(MODIFIER||||||||)
Gm03	2717119	C	G	EFF=INTERGENIC(MODIFIER||||||||)
Gm03	2717134	T	A	EFF=INTERGENIC(MODIFIER||||||||)
Gm03	2746991	C	T	EFF=INTRON(MODIFIER||||Glyma03g02930|mRNA||PAC:16250936|)
Gm03	2762333	G	T	EFF=NON_SYNONYMOUS_CODING(MODERATE|MISSENSE|gaG/gaT|E287D|Glyma03g02940|mRNA||PAC:16250937|PAC:16250937.exon.7),NON_SYNONYMOUS_CODING(MODERATE|MISSENSE|gaG/gaT|E287D|Glyma03g02940|mRNA||PAC:16250938|PAC:16250938.exon.7)
Gm03	2823117	T	C	EFF=INTERGENIC(MODIFIER||||||||)
Gm03	2823136	C	A	EFF=INTERGENIC(MODIFIER||||||||)
Gm03	2848720	C	T	EFF=INTERGENIC(MODIFIER||||||||)
Gm03	2848729	G	A	EFF=INTERGENIC(MODIFIER||||||||)
Gm03	2857363	G	A	EFF=INTERGENIC(MODIFIER||||||||)
Gm03	2888836	C	T	EFF=SYNONYMOUS_CODING(LOW|SILENT|ggG/ggA|G93|Glyma03g03090|mRNA||PAC:16250953|PAC:16250953.exon.2)
Gm03	2888998	C	T	EFF=SYNONYMOUS_CODING(LOW|SILENT|ggG/ggA|G39|Glyma03g03090|mRNA||PAC:16250953|PAC:16250953.exon.2)
Gm03	2918675	T	C	EFF=INTRON(MODIFIER||||Glyma03g03120|mRNA||PAC:16250956|),INTRON(MODIFIER||||Glyma03g03120|mRNA||PAC:16250957|)
Gm03	2926956	G	A	EFF=INTRON(MODIFIER||||Glyma03g03120|mRNA||PAC:16250956|),INTRON(MODIFIER||||Glyma03g03120|mRNA||PAC:16250957|)
Gm03	2944464	T	A	EFF=UPSTREAM(MODIFIER||||Glyma03g03140|mRNA||PAC:16250959|)
Gm03	2944523	G	T	EFF=UPSTREAM(MODIFIER||||Glyma03g03140|mRNA||PAC:16250959|)
Gm03	2944551	T	C	EFF=UPSTREAM(MODIFIER||||Glyma03g03140|mRNA||PAC:16250959|)
Gm03	3012147	G	A	EFF=INTRON(MODIFIER||||Glyma03g03230|mRNA||PAC:16250969|),INTRON(MODIFIER||||Glyma03g03230|mRNA||PAC:16250970|),INTRON(MODIFIER||||Glyma03g03230|mRNA||PAC:16250971|)
Gm03	3028617	T	G	EFF=INTRON(MODIFIER||||Glyma03g03250|mRNA||PAC:16250973|)
Gm03	3061435	C	T	EFF=UPSTREAM(MODIFIER||||Glyma03g03280|mRNA||PAC:16250975|)
Gm03	3061447	G	A	EFF=UPSTREAM(MODIFIER||||Glyma03g03280|mRNA||PAC:16250975|)
Gm03	3081776	T	G	EFF=NON_SYNONYMOUS_CODING(MODERATE|MISSENSE|aTt/aGt|I173S|Glyma03g03310|mRNA||PAC:16250979|PAC:16250979.exon.3),NON_SYNONYMOUS_CODING(MODERATE|MISSENSE|aTt/aGt|I173S|Glyma03g03310|mRNA||PAC:16250980|PAC:16250980.exon.3),NON_SYNONYMOUS_CODING(MODERATE|MISSENSE|aTt/aGt|I173S|Glyma03g03310|mRNA||PAC:16250981|PAC:16250981.exon.2),UPSTREAM(MODIFIER||||Glyma03g03300|mRNA||PAC:16250977|),UPSTREAM(MODIFI…
Gm03	3093778	AG	A	EFF=DOWNSTREAM(MODIFIER||||Glyma03g03330|mRNA||PAC:16250983|)
Gm03	3104322	G	A	EFF=DOWNSTREAM(MODIFIER||||Glyma03g03340|mRNA||PAC:16250984|)
Gm03	3121493	G	C	EFF=STOP_GAINED(HIGH|NONSENSE|taC/taG|Y357*|Glyma03g03360|mRNA||PAC:16250986|PAC:16250986.exon.4)
Gm03	3153549	C	T	EFF=DOWNSTREAM(MODIFIER||||Glyma03g03410|mRNA||PAC:16250991|),SYNONYMOUS_CODING(LOW|SILENT|aaC/aaT|N381|Glyma03g03400|mRNA||PAC:16250990|PAC:16250990.exon.2)
Gm03	3171051	G	A	EFF=INTERGENIC(MODIFIER||||||||)
Gm03	3171066	T	G	EFF=INTERGENIC(MODIFIER||||||||)
Gm03	3233373	A	G	EFF=INTERGENIC(MODIFIER||||||||)
Gm03	3391237	A	G	EFF=INTERGENIC(MODIFIER||||||||)
Gm03	3415972	G	A	EFF=INTERGENIC(MODIFIER||||||||)
Gm03	3549162	T	G	EFF=NON_SYNONYMOUS_CODING(MODERATE|MISSENSE|Agt/Cgt|S414R|Glyma03g03750|mRNA||PAC:16251026|PAC:16251026.exon.5),NON_SYNONYMOUS_CODING(MODERATE|MISSENSE|Agt/Cgt|S649R|Glyma03g03750|mRNA||PAC:16251025|PAC:16251025.exon.7)
Gm03	3608819	T	G	EFF=DOWNSTREAM(MODIFIER||||Glyma03g03780|mRNA||PAC:16251029|)
Gm03	3645306	T	C	EFF=NON_SYNONYMOUS_CODING(MODERATE|MISSENSE|cAg/cGg|Q112R|Glyma03g03810|mRNA||PAC:16251033|PAC:16251033.exon.1)
Gm03	3710317	G	A	EFF=INTERGENIC(MODIFIER||||||||)
Gm03	3791888	A	T	EFF=UPSTREAM(MODIFIER||||Glyma03g03890|mRNA||PAC:16251042|),UPSTREAM(MODIFIER||||Glyma03g03890|mRNA||PAC:16251043|)
Gm03	3803581	T	G	EFF=INTRON(MODIFIER||||Glyma03g03890|mRNA||PAC:16251042|),UTR_3_PRIME(MODIFIER||||Glyma03g03890|mRNA||PAC:16251043|PAC:16251043.exon.15)
Gm03	3805526	GTT	GT	EFF=INTRON(MODIFIER||||Glyma03g03890|mRNA||PAC:16251042|),INTRON(MODIFIER||||Glyma03g03890|mRNA||PAC:16251043|)
Gm03	3805532	T	C	EFF=INTRON(MODIFIER||||Glyma03g03890|mRNA||PAC:16251042|),INTRON(MODIFIER||||Glyma03g03890|mRNA||PAC:16251043|)
Gm03	3832325	G	A	EFF=SYNONYMOUS_CODING(LOW|SILENT|gtC/gtT|V433|Glyma03g03930|mRNA||PAC:16251046|PAC:16251046.exon.2),UPSTREAM(MODIFIER||||Glyma03g03920|mRNA||PAC:16251045|)
Gm03	3967813	CTGTGT	CTGT	EFF=DOWNSTREAM(MODIFIER||||Glyma03g04010|mRNA||PAC:16251054|),UPSTREAM(MODIFIER||||Glyma03g04020|mRNA||PAC:16251055|)
Gm03	3967830	A	T	EFF=DOWNSTREAM(MODIFIER||||Glyma03g04010|mRNA||PAC:16251054|),UPSTREAM(MODIFIER||||Glyma03g04020|mRNA||PAC:16251055|)
Gm03	3970890	G	C	EFF=NON_SYNONYMOUS_CODING(MODERATE|MISSENSE|Ggg/Cgg|G768R|Glyma03g04020|mRNA||PAC:16251055|PAC:16251055.exon.2)
Gm03	3993562	T	A	EFF=NON_SYNONYMOUS_CODING(MODERATE|MISSENSE|Agt/Tgt|S723C|Glyma03g04030|mRNA||PAC:16251056|PAC:16251056.exon.1)
Gm03	3993588	G	A	EFF=NON_SYNONYMOUS_CODING(MODERATE|MISSENSE|gCt/gTt|A714V|Glyma03g04030|mRNA||PAC:16251056|PAC:16251056.exon.1)
Gm03	4038350	A	T	EFF=NON_SYNONYMOUS_CODING(MODERATE|MISSENSE|agT/agA|S887R|Glyma03g04080|mRNA||PAC:16251061|PAC:16251061.exon.1)
Gm03	4054505	G	A	EFF=INTERGENIC(MODIFIER||||||||)
Gm03	4076810	G	T	EFF=INTRON(MODIFIER||||Glyma03g04100|mRNA||PAC:16251063|)
Gm03	4198767	C	T	EFF=INTERGENIC(MODIFIER||||||||)
Gm03	4198791	T	C	EFF=INTERGENIC(MODIFIER||||||||)
Gm03	4198825	A	G	EFF=INTERGENIC(MODIFIER||||||||)
Gm03	4198827	A	T	EFF=INTERGENIC(MODIFIER||||||||)
Gm03	4343790	T	G	EFF=INTERGENIC(MODIFIER||||||||)
Gm03	4391694	G	A	EFF=SYNONYMOUS_CODING(LOW|SILENT|ccC/ccT|P902|Glyma03g04300|mRNA||PAC:16251081|PAC:16251081.exon.1)
Gm03	4464057	T	C	EFF=DOWNSTREAM(MODIFIER||||Glyma03g04340|mRNA||PAC:16251085|),INTRAGENIC(MODIFIER||||Glyma03g04330|mRNA|||)
Gm03	4464524	C	A	EFF=DOWNSTREAM(MODIFIER||||Glyma03g04340|mRNA||PAC:16251085|),INTRAGENIC(MODIFIER||||Glyma03g04330|mRNA|||)
Gm03	4464565	G	A	EFF=DOWNSTREAM(MODIFIER||||Glyma03g04340|mRNA||PAC:16251085|),INTRAGENIC(MODIFIER||||Glyma03g04330|mRNA|||)
Gm03	4464604	C	T	EFF=DOWNSTREAM(MODIFIER||||Glyma03g04340|mRNA||PAC:16251085|),INTRAGENIC(MODIFIER||||Glyma03g04330|mRNA|||)
Gm03	4464725	T	A	EFF=DOWNSTREAM(MODIFIER||||Glyma03g04340|mRNA||PAC:16251085|),INTRAGENIC(MODIFIER||||Glyma03g04330|mRNA|||)
Gm03	4484137	G	A	EFF=DOWNSTREAM(MODIFIER||||Glyma03g04370|mRNA||PAC:16251088|),INTRON(MODIFIER||||Glyma03g04360|mRNA||PAC:16251087|)
Gm03	4647698	A	G	EFF=INTERGENIC(MODIFIER||||||||)
Gm03	4647732	A	G	EFF=INTERGENIC(MODIFIER||||||||)
Gm03	4666746	C	G	EFF=SYNONYMOUS_CODING(LOW|SILENT|gtG/gtC|V60|Glyma03g04500|mRNA||PAC:16251101|PAC:16251101.exon.4),SYNONYMOUS_CODING(LOW|SILENT|gtG/gtC|V60|Glyma03g04500|mRNA||PAC:16251102|PAC:16251102.exon.3)
Gm03	4707063	C	G	EFF=UPSTREAM(MODIFIER||||Glyma03g04530|mRNA||PAC:16251105|)
Gm03	4760463	A	C	EFF=INTRAGENIC(MODIFIER||||Glyma03g04590|mRNA|||)
Gm03	4776019	A	G	EFF=INTERGENIC(MODIFIER||||||||)
Gm03	4776107	C	T	EFF=INTERGENIC(MODIFIER||||||||)
Gm03	4788084	C	G	EFF=NON_SYNONYMOUS_CODING(MODERATE|MISSENSE|cCa/cGa|P1050R|Glyma03g04610|mRNA||PAC:16251113|PAC:16251113.exon.3)
Gm03	4799201	G	A	EFF=NON_SYNONYMOUS_CODING(MODERATE|MISSENSE|aCc/aTc|T290I|Glyma03g04620|mRNA||PAC:16251114|PAC:16251114.exon.2)
Gm03	4799242	A	T	EFF=SYNONYMOUS_CODING(LOW|SILENT|tcT/tcA|S276|Glyma03g04620|mRNA||PAC:16251114|PAC:16251114.exon.2)
Gm03	4931379	C	T	EFF=UPSTREAM(MODIFIER||||Glyma03g04730|mRNA||PAC:16251123|)
Gm03	4931391	T	C	EFF=UPSTREAM(MODIFIER||||Glyma03g04730|mRNA||PAC:16251123|)
Gm03	4931408	C	T	EFF=UPSTREAM(MODIFIER||||Glyma03g04730|mRNA||PAC:16251123|)
Gm03	5086338	T	C	EFF=INTERGENIC(MODIFIER||||||||)
Gm03	5148003	G	C	EFF=SYNONYMOUS_CODING(LOW|SILENT|gcG/gcC|A76|Glyma03g04960|mRNA||PAC:16251145|PAC:16251145.exon.1)
Gm03	5178306	A	G	EFF=INTERGENIC(MODIFIER||||||||)
Gm03	5178316	C	T	EFF=INTERGENIC(MODIFIER||||||||)
Gm03	5178349	G	T	EFF=INTERGENIC(MODIFIER||||||||)
Gm03	5210156	T	A	EFF=UPSTREAM(MODIFIER||||Glyma03g04990|mRNA||PAC:16251148|)
Gm03	5212619	C	T	EFF=SYNONYMOUS_CODING(LOW|SILENT|tcC/tcT|S46|Glyma03g04990|mRNA||PAC:16251148|PAC:16251148.exon.1)
Gm03	5212633	C	T	EFF=NON_SYNONYMOUS_CODING(MODERATE|MISSENSE|gCg/gTg|A51V|Glyma03g04990|mRNA||PAC:16251148|PAC:16251148.exon.1)
Gm03	5212670	G	A	EFF=SYNONYMOUS_CODING(LOW|SILENT|agG/agA|R63|Glyma03g04990|mRNA||PAC:16251148|PAC:16251148.exon.1)
Gm03	5212712	T	C	EFF=SYNONYMOUS_CODING(LOW|SILENT|ccT/ccC|P77|Glyma03g04990|mRNA||PAC:16251148|PAC:16251148.exon.1)
Gm03	5336435	T	C	EFF=INTERGENIC(MODIFIER||||||||)
Gm03	5336465	A	G	EFF=INTERGENIC(MODIFIER||||||||)
Gm03	5384505	G	T	EFF=SYNONYMOUS_CODING(LOW|SILENT|gtG/gtT|V364|Glyma03g05090|mRNA||PAC:16251158|PAC:16251158.exon.7)
Gm03	5384576	T	G	EFF=NON_SYNONYMOUS_CODING(MODERATE|MISSENSE|tTt/tGt|F388C|Glyma03g05090|mRNA||PAC:16251158|PAC:16251158.exon.7)
Gm03	5465601	A	G	EFF=DOWNSTREAM(MODIFIER||||Glyma03g05190|mRNA||PAC:16251169|),NON_SYNONYMOUS_CODING(MODERATE|MISSENSE|Aaa/Gaa|K41E|Glyma03g05200|mRNA||PAC:16251170|PAC:16251170.exon.2)
Gm03	5494554	G	C	EFF=UTR_3_PRIME(MODIFIER||||Glyma03g05210|mRNA||PAC:16251171|PAC:16251171.exon.8)
Gm03	5622159	A	G	EFF=INTERGENIC(MODIFIER||||||||)
Gm03	5622201	C	T	EFF=INTERGENIC(MODIFIER||||||||)
Gm03	5634582	A	T	EFF=DOWNSTREAM(MODIFIER||||Glyma03g05370|mRNA||PAC:16251188|)
Gm03	5634682	G	A	EFF=DOWNSTREAM(MODIFIER||||Glyma03g05370|mRNA||PAC:16251188|)
Gm03	5634696	T	G	EFF=DOWNSTREAM(MODIFIER||||Glyma03g05370|mRNA||PAC:16251188|)
Gm03	5837875	C	G	EFF=INTERGENIC(MODIFIER||||||||)
Gm03	5858874	A	T	EFF=INTRAGENIC(MODIFIER||||Glyma03g05550|mRNA|||)
Gm03	5858881	T	C	EFF=INTRAGENIC(MODIFIER||||Glyma03g05550|mRNA|||)
Gm03	6038336	A	G	EFF=DOWNSTREAM(MODIFIER||||Glyma03g05690|mRNA||PAC:16251223|)
Gm03	6051309	C	A	EFF=DOWNSTREAM(MODIFIER||||Glyma03g05730|mRNA||PAC:16251226|)
Gm03	6245499	G	A	EFF=INTERGENIC(MODIFIER||||||||)
Gm03	6245505	T	A	EFF=INTERGENIC(MODIFIER||||||||)
Gm03	6249531	A	G	EFF=INTERGENIC(MODIFIER||||||||)
Gm03	6432190	G	A	EFF=INTERGENIC(MODIFIER||||||||)
Gm03	6537298	A	G	EFF=SYNONYMOUS_CODING(LOW|SILENT|tcT/tcC|S110|Glyma03g06320|mRNA||PAC:16251259|PAC:16251259.exon.1)
Gm03	6537337	T	C	EFF=SYNONYMOUS_CODING(LOW|SILENT|cgA/cgG|R97|Glyma03g06320|mRNA||PAC:16251259|PAC:16251259.exon.1)
Gm03	6683029	G	C	EFF=DOWNSTREAM(MODIFIER||||Glyma03g06410|mRNA||PAC:16251268|)
Gm03	6683041	A	C	EFF=DOWNSTREAM(MODIFIER||||Glyma03g06410|mRNA||PAC:16251268|)
Gm03	6691907	T	C	EFF=INTRON(MODIFIER||||Glyma03g06420|mRNA||PAC:16251269|),INTRON(MODIFIER||||Glyma03g06420|mRNA||PAC:16251270|)
Gm03	6780815	T	C	EFF=NON_SYNONYMOUS_CODING(MODERATE|MISSENSE|Ttt/Ctt|F43L|Glyma03g06540|mRNA||PAC:16251283|PAC:16251283.exon.2),UPSTREAM(MODIFIER||||Glyma03g06530|mRNA||PAC:16251282|)
Gm03	6850097	T	A	EFF=SYNONYMOUS_CODING(LOW|SILENT|tcA/tcT|S853|Glyma03g06600|mRNA||PAC:16251289|PAC:16251289.exon.3),UPSTREAM(MODIFIER||||Glyma03g06590|mRNA||PAC:16251288|)
Gm03	6882865	G	A	EFF=INTERGENIC(MODIFIER||||||||)
Gm03	6882958	A	G	EFF=INTERGENIC(MODIFIER||||||||)
Gm03	6883105	C	T	EFF=INTERGENIC(MODIFIER||||||||)
Gm03	6961916	T	G	EFF=DOWNSTREAM(MODIFIER||||Glyma03g06650|mRNA||PAC:16251294|),INTRON(MODIFIER||||Glyma03g06660|mRNA||PAC:16251295|)
Gm03	6962046	G	A	EFF=INTRON(MODIFIER||||Glyma03g06660|mRNA||PAC:16251295|)
Gm03	6962072	T	G	EFF=INTRON(MODIFIER||||Glyma03g06660|mRNA||PAC:16251295|)
Gm03	6971123	C	T	EFF=INTERGENIC(MODIFIER||||||||)
Gm03	6995740	GAAAAAA	GAAAAAAA	EFF=INTERGENIC(MODIFIER||||||||)
Gm03	6995764	C	T	EFF=INTERGENIC(MODIFIER||||||||)
Gm03	7089039	C	T	EFF=INTERGENIC(MODIFIER||||||||)
Gm03	7140270	C	T	EFF=INTERGENIC(MODIFIER||||||||)
Gm03	7755731	G	A	EFF=DOWNSTREAM(MODIFIER||||Glyma03g07320|mRNA||PAC:16251359|)
Gm03	7755857	C	A	EFF=DOWNSTREAM(MODIFIER||||Glyma03g07320|mRNA||PAC:16251359|)
Gm03	7755862	C	T	EFF=DOWNSTREAM(MODIFIER||||Glyma03g07320|mRNA||PAC:16251359|)
Gm03	7755934	G	A	EFF=DOWNSTREAM(MODIFIER||||Glyma03g07320|mRNA||PAC:16251359|)
Gm03	7792758	G	T	EFF=NON_SYNONYMOUS_CODING(MODERATE|MISSENSE|Ggc/Tgc|G147C|Glyma03g07350|mRNA||PAC:16251362|PAC:16251362.exon.2)
Gm03	7798524	G	A	EFF=SYNONYMOUS_CODING(LOW|SILENT|ctG/ctA|L279|Glyma03g07350|mRNA||PAC:16251362|PAC:16251362.exon.4)
Gm03	7956282	G	C	EFF=DOWNSTREAM(MODIFIER||||Glyma03g07400|mRNA||PAC:16251368|),DOWNSTREAM(MODIFIER||||Glyma03g07420|mRNA||PAC:16251370|),DOWNSTREAM(MODIFIER||||Glyma03g07420|mRNA||PAC:16251371|),DOWNSTREAM(MODIFIER||||Glyma03g07420|mRNA||PAC:16251372|),UPSTREAM(MODIFIER||||Glyma03g07410|mRNA||PAC:16251369|)
Gm03	7981670	T	G	EFF=INTERGENIC(MODIFIER||||||||)
Gm03	8046986	T	G	EFF=NON_SYNONYMOUS_CODING(MODERATE|MISSENSE|aTg/aGg|M69R|Glyma03g07460|mRNA||PAC:16251376|PAC:16251376.exon.1)
Gm03	8047005	C	T	EFF=SYNONYMOUS_CODING(LOW|SILENT|taC/taT|Y75|Glyma03g07460|mRNA||PAC:16251376|PAC:16251376.exon.1)
Gm03	8049667	C	T	EFF=INTRON(MODIFIER||||Glyma03g07460|mRNA||PAC:16251376|)
Gm03	8141559	A	G	EFF=INTERGENIC(MODIFIER||||||||)
Gm03	8303372	A	G	EFF=INTERGENIC(MODIFIER||||||||)
Gm03	8303428	C	T	EFF=INTERGENIC(MODIFIER||||||||)
Gm03	8536677	CAA	CAAA	EFF=DOWNSTREAM(MODIFIER||||Glyma03g07790|mRNA||PAC:16251411|),UTR_3_PRIME(MODIFIER||||Glyma03g07790|mRNA||PAC:16251410|PAC:16251410.exon.27)
Gm03	8536678	A	AN	EFF=DOWNSTREAM(MODIFIER||||Glyma03g07790|mRNA||PAC:16251411|),UTR_3_PRIME(MODIFIER||||Glyma03g07790|mRNA||PAC:16251410|PAC:16251410.exon.27)
Gm03	8536693	T	C	EFF=DOWNSTREAM(MODIFIER||||Glyma03g07790|mRNA||PAC:16251411|),UTR_3_PRIME(MODIFIER||||Glyma03g07790|mRNA||PAC:16251410|PAC:16251410.exon.27)
Gm03	8548659	A	C	EFF=INTRON(MODIFIER||||Glyma03g07790|mRNA||PAC:16251410|),INTRON(MODIFIER||||Glyma03g07790|mRNA||PAC:16251411|)
Gm03	8548663	G	A	EFF=INTRON(MODIFIER||||Glyma03g07790|mRNA||PAC:16251410|),INTRON(MODIFIER||||Glyma03g07790|mRNA||PAC:16251411|)
Gm03	8548686	A	C	EFF=INTRON(MODIFIER||||Glyma03g07790|mRNA||PAC:16251410|),INTRON(MODIFIER||||Glyma03g07790|mRNA||PAC:16251411|)
Gm03	8585543	C	T	EFF=INTERGENIC(MODIFIER||||||||)
Gm03	8590121	T	G	EFF=INTERGENIC(MODIFIER||||||||)
Gm03	8701800	T	C	EFF=NON_SYNONYMOUS_CODING(MODERATE|MISSENSE|gTt/gCt|V247A|Glyma03g07950|mRNA||PAC:16251428|PAC:16251428.exon.5)
Gm03	8701807	A	C	EFF=SYNONYMOUS_CODING(LOW|SILENT|ctA/ctC|L249|Glyma03g07950|mRNA||PAC:16251428|PAC:16251428.exon.5)
Gm03	8870857	C	A	EFF=UPSTREAM(MODIFIER||||Glyma03g08030|mRNA||PAC:16251435|)
Gm03	8903185	A	G	EFF=INTERGENIC(MODIFIER||||||||)
Gm03	8916734	T	C	EFF=INTERGENIC(MODIFIER||||||||)
Gm03	8916751	G	T	EFF=INTERGENIC(MODIFIER||||||||)
Gm03	8916754	G	A	EFF=INTERGENIC(MODIFIER||||||||)
Gm03	9179423	T	A	EFF=INTERGENIC(MODIFIER||||||||)
Gm03	9282121	A	T	EFF=INTERGENIC(MODIFIER||||||||)
Gm03	9549497	C	T	EFF=INTERGENIC(MODIFIER||||||||)
Gm03	9552080	C	T	EFF=INTERGENIC(MODIFIER||||||||)
Gm03	9565810	C	T	EFF=INTERGENIC(MODIFIER||||||||)
Gm03	9767852	G	A	EFF=INTERGENIC(MODIFIER||||||||)
Gm03	9767872	G	A	EFF=INTERGENIC(MODIFIER||||||||)
Gm03	9794823	C	T	EFF=INTERGENIC(MODIFIER||||||||)
Gm03	9794828	G	C	EFF=INTERGENIC(MODIFIER||||||||)
Gm03	9794898	A	T	EFF=INTERGENIC(MODIFIER||||||||)
Gm03	9895720	T	A	EFF=INTERGENIC(MODIFIER||||||||)
Gm03	9936731	T	C	EFF=INTERGENIC(MODIFIER||||||||)
Gm03	10357319	G	T	EFF=INTERGENIC(MODIFIER||||||||)
Gm03	10780472	C	T	EFF=INTERGENIC(MODIFIER||||||||)
Gm03	10816437	G	A	EFF=INTERGENIC(MODIFIER||||||||)
Gm03	10870378	C	G	EFF=INTERGENIC(MODIFIER||||||||)
Gm03	11031908	A	T	EFF=INTERGENIC(MODIFIER||||||||)
Gm03	11129685	C	T	EFF=INTERGENIC(MODIFIER||||||||)
Gm03	11129720	T	C	EFF=INTERGENIC(MODIFIER||||||||)
Gm03	11154792	C	G	EFF=INTERGENIC(MODIFIER||||||||)
Gm03	11211387	G	C	EFF=INTERGENIC(MODIFIER||||||||)
Gm03	11380192	T	G	EFF=INTERGENIC(MODIFIER||||||||)
Gm03	11380207	A	G	EFF=INTERGENIC(MODIFIER||||||||)
Gm03	11381491	A	G	EFF=INTERGENIC(MODIFIER||||||||)
Gm03	11445715	T	C	EFF=INTERGENIC(MODIFIER||||||||)
Gm03	11586154	T	G	EFF=INTERGENIC(MODIFIER||||||||)
Gm03	11587338	G	A	EFF=INTERGENIC(MODIFIER||||||||)
Gm03	11613766	G	T	EFF=INTERGENIC(MODIFIER||||||||)
Gm03	11613802	A	G	EFF=INTERGENIC(MODIFIER||||||||)
Gm03	11613825	A	G	EFF=INTERGENIC(MODIFIER||||||||)
Gm03	11729370	G	C	EFF=INTERGENIC(MODIFIER||||||||)
Gm03	11729376	G	A	EFF=INTERGENIC(MODIFIER||||||||)
Gm03	11734676	A	G	EFF=INTERGENIC(MODIFIER||||||||)
Gm03	11742072	G	A	EFF=INTERGENIC(MODIFIER||||||||)
Gm03	11791061	C	T	EFF=INTERGENIC(MODIFIER||||||||)
Gm03	11886004	T	A	EFF=SYNONYMOUS_CODING(LOW|SILENT|acA/acT|T175|Glyma03g09870|mRNA||PAC:16251551|PAC:16251551.exon.4),SYNONYMOUS_CODING(LOW|SILENT|acA/acT|T218|Glyma03g09870|mRNA||PAC:16251550|PAC:16251550.exon.4)
Gm03	11984908	A	G	EFF=INTERGENIC(MODIFIER||||||||)
Gm03	12259485	GTTTTTTTT	GTTTTTTTTT	EFF=INTERGENIC(MODIFIER||||||||)
Gm03	12779834	G	A	EFF=UPSTREAM(MODIFIER||||Glyma03g10390|mRNA||PAC:16251565|)
Gm03	13058539	C	T	EFF=INTERGENIC(MODIFIER||||||||)
Gm03	13660108	C	T	EFF=INTERGENIC(MODIFIER||||||||)
Gm03	13660135	G	T	EFF=INTERGENIC(MODIFIER||||||||)
Gm03	13984830	G	C	EFF=INTERGENIC(MODIFIER||||||||)
Gm03	13984884	G	A	EFF=INTERGENIC(MODIFIER||||||||)
Gm03	14710974	T	C	EFF=INTERGENIC(MODIFIER||||||||)
Gm03	14795627	T	A	EFF=INTERGENIC(MODIFIER||||||||)
Gm03	14847974	T	C	EFF=INTERGENIC(MODIFIER||||||||)
Gm03	14897029	C	A	EFF=INTERGENIC(MODIFIER||||||||)
Gm03	14990574	GTTTTTTTT	GTTTTTTTTT	EFF=UPSTREAM(MODIFIER||||Glyma03g12070|mRNA||PAC:16251614|),UPSTREAM(MODIFIER||||Glyma03g12070|mRNA||PAC:16251615|),UPSTREAM(MODIFIER||||Glyma03g12070|mRNA||PAC:16251616|)
Gm03	15105645	A	C	EFF=UPSTREAM(MODIFIER||||Glyma03g12140|mRNA||PAC:16251623|)
Gm03	15116076	T	C	EFF=INTERGENIC(MODIFIER||||||||)
Gm03	15387903	T	C	EFF=INTERGENIC(MODIFIER||||||||)
Gm03	15448204	A	G	EFF=INTERGENIC(MODIFIER||||||||)
Gm03	15461931	C	T	EFF=INTERGENIC(MODIFIER||||||||)
Gm03	15500052	T	C	EFF=INTERGENIC(MODIFIER||||||||)
Gm03	15750293	A	G	EFF=INTERGENIC(MODIFIER||||||||)
Gm03	16031100	G	A	EFF=INTERGENIC(MODIFIER||||||||)
Gm03	16031194	A	G	EFF=INTERGENIC(MODIFIER||||||||)
Gm03	16079336	C	T	EFF=INTERGENIC(MODIFIER||||||||)
Gm03	16106266	T	C	EFF=INTERGENIC(MODIFIER||||||||)
Gm03	16106283	C	T	EFF=INTERGENIC(MODIFIER||||||||)
Gm03	16106292	C	T	EFF=INTERGENIC(MODIFIER||||||||)
Gm03	16106320	G	A	EFF=INTERGENIC(MODIFIER||||||||)
Gm03	16106613	C	T	EFF=INTERGENIC(MODIFIER||||||||)
Gm03	16106756	A	G	EFF=INTERGENIC(MODIFIER||||||||)
Gm03	16106776	G	A	EFF=INTERGENIC(MODIFIER||||||||)
Gm03	16106830	G	A	EFF=INTERGENIC(MODIFIER||||||||)
Gm03	16106836	A	G	EFF=INTERGENIC(MODIFIER||||||||)
Gm03	16106854	G	A	EFF=INTERGENIC(MODIFIER||||||||)
Gm03	16152978	C	T	EFF=INTERGENIC(MODIFIER||||||||)
Gm03	16152988	A	G	EFF=INTERGENIC(MODIFIER||||||||)
Gm03	16301838	A	T	EFF=SYNONYMOUS_CODING(LOW|SILENT|ctT/ctA|L374|Glyma03g12660|mRNA||PAC:16251641|PAC:16251641.exon.2)
Gm03	16435325	C	T	EFF=INTERGENIC(MODIFIER||||||||)
Gm03	16557940	C	T	EFF=INTERGENIC(MODIFIER||||||||)
Gm03	16846957	CCTCTCTCTCTCTCTCTCTCTCTCTCTCTCTCTCT	CCTCTCTCTCTCTCTCTCTCTCTCTCTCTCTCT	EFF=INTRON(MODIFIER||||Glyma03g13300|mRNA||PAC:16251646|)
Gm03	17038154	C	T	EFF=INTERGENIC(MODIFIER||||||||)
Gm03	17418151	C	T	EFF=INTERGENIC(MODIFIER||||||||)
Gm03	17433499	C	T	EFF=INTERGENIC(MODIFIER||||||||)
Gm03	17531880	G	A	EFF=INTERGENIC(MODIFIER||||||||)
Gm03	18176075	T	C	EFF=INTERGENIC(MODIFIER||||||||)
Gm03	18249790	A	C	EFF=INTERGENIC(MODIFIER||||||||)
Gm03	18316655	C	T	EFF=INTERGENIC(MODIFIER||||||||)
Gm03	18583696	A	G	EFF=INTERGENIC(MODIFIER||||||||)
Gm03	19384069	T	C	EFF=INTERGENIC(MODIFIER||||||||)
Gm03	19446491	A	T	EFF=INTERGENIC(MODIFIER||||||||)
Gm03	19541986	C	T	EFF=DOWNSTREAM(MODIFIER||||Glyma03g15360|mRNA||PAC:16251761|)
Gm03	19542010	C	A	EFF=DOWNSTREAM(MODIFIER||||Glyma03g15360|mRNA||PAC:16251761|)
Gm03	19763054	C	T	EFF=INTERGENIC(MODIFIER||||||||)
Gm03	19763064	G	A	EFF=INTERGENIC(MODIFIER||||||||)
Gm03	19780069	C	T	EFF=INTERGENIC(MODIFIER||||||||)
Gm03	19780384	T	C	EFF=INTERGENIC(MODIFIER||||||||)
Gm03	19804776	T	C	EFF=INTERGENIC(MODIFIER||||||||)
Gm03	19866603	G	A	EFF=INTERGENIC(MODIFIER||||||||)
Gm03	19961860	C	T	EFF=INTERGENIC(MODIFIER||||||||)
Gm03	20102678	T	C	EFF=INTRON(MODIFIER||||Glyma03g15810|mRNA||PAC:16251771|)
Gm03	20107307	C	T	EFF=SYNONYMOUS_CODING(LOW|SILENT|gaC/gaT|D265|Glyma03g15810|mRNA||PAC:16251771|PAC:16251771.exon.2)
Gm03	20140189	T	G	EFF=INTRON(MODIFIER||||Glyma03g15820|mRNA||PAC:16251772|)
Gm03	20171369	GGCG	GGCGCG	EFF=UTR_3_PRIME(MODIFIER||||Glyma03g15850|mRNA||PAC:16251775|PAC:16251775.exon.12)
Gm03	20224266	A	T	EFF=DOWNSTREAM(MODIFIER||||Glyma03g15880|mRNA||PAC:16251778|),UPSTREAM(MODIFIER||||Glyma03g15890|mRNA||PAC:16251779|)
Gm03	20480949	C	T	EFF=DOWNSTREAM(MODIFIER||||Glyma03g16130|mRNA||PAC:16251784|)
Gm03	20480963	CAA	CA	EFF=DOWNSTREAM(MODIFIER||||Glyma03g16130|mRNA||PAC:16251784|)
Gm03	20623187	T	TC	EFF=UPSTREAM(MODIFIER||||Glyma03g16250|mRNA||PAC:16251794|)
Gm03	20623263	T	C	EFF=UPSTREAM(MODIFIER||||Glyma03g16250|mRNA||PAC:16251794|)
Gm03	20623326	G	C	EFF=UPSTREAM(MODIFIER||||Glyma03g16250|mRNA||PAC:16251794|)
Gm03	20744811	A	C	EFF=INTERGENIC(MODIFIER||||||||)
Gm03	20837201	T	A	EFF=INTERGENIC(MODIFIER||||||||)
Gm03	20863488	C	T	EFF=UPSTREAM(MODIFIER||||Glyma03g16420|mRNA||PAC:16251811|)
Gm03	20863504	T	C	EFF=UPSTREAM(MODIFIER||||Glyma03g16420|mRNA||PAC:16251811|)
Gm03	21052519	T	C	EFF=INTERGENIC(MODIFIER||||||||)
Gm03	21052543	C	T	EFF=INTERGENIC(MODIFIER||||||||)
Gm03	21599041	G	A	EFF=INTERGENIC(MODIFIER||||||||)
Gm03	21641817	GACACA	GACA	EFF=INTERGENIC(MODIFIER||||||||)
Gm03	21671132	C	A	EFF=INTERGENIC(MODIFIER||||||||)
Gm03	22556510	C	T	EFF=INTERGENIC(MODIFIER||||||||)
Gm03	22556564	G	A	EFF=INTERGENIC(MODIFIER||||||||)
Gm03	22556702	C	A	EFF=INTERGENIC(MODIFIER||||||||)
Gm03	22556715	A	G	EFF=INTERGENIC(MODIFIER||||||||)
Gm03	22556747	G	A	EFF=INTERGENIC(MODIFIER||||||||)
Gm03	22557290	G	A	EFF=INTERGENIC(MODIFIER||||||||)
Gm03	22565987	T	C	EFF=INTERGENIC(MODIFIER||||||||)
Gm03	22565995	C	T	EFF=INTERGENIC(MODIFIER||||||||)
Gm03	22748984	C	T	EFF=INTERGENIC(MODIFIER||||||||)
Gm03	23693297	T	G	EFF=INTERGENIC(MODIFIER||||||||)
Gm03	24385691	T	A	EFF=NON_SYNONYMOUS_CODING(MODERATE|MISSENSE|gAt/gTt|D159V|Glyma03g19030|mRNA||PAC:16251923|PAC:16251923.exon.1)
Gm03	24532244	G	A	EFF=INTERGENIC(MODIFIER||||||||)
Gm03	24692356	G	A	EFF=INTERGENIC(MODIFIER||||||||)
Gm03	24692829	G	A	EFF=INTERGENIC(MODIFIER||||||||)
Gm03	24737562	G	A	EFF=INTERGENIC(MODIFIER||||||||)
Gm03	26087774	G	A	EFF=INTERGENIC(MODIFIER||||||||)
Gm03	26087811	C	T	EFF=INTERGENIC(MODIFIER||||||||)
Gm03	26453368	T	C	EFF=NON_SYNONYMOUS_CODING(MODERATE|MISSENSE|Aca/Gca|T258A|Glyma03g20860|mRNA||PAC:16251969|PAC:16251969.exon.3)
Gm03	26978962	G	A	EFF=NON_SYNONYMOUS_CODING(MODERATE|MISSENSE|Cgc/Tgc|R180C|Glyma03g21340|mRNA||PAC:16251979|PAC:16251979.exon.3)
Gm03	26979211	T	C	EFF=INTRON(MODIFIER||||Glyma03g21340|mRNA||PAC:16251979|)
Gm03	27965339	T	G	EFF=UPSTREAM(MODIFIER||||Glyma03g22060|mRNA||PAC:16252016|)
Gm03	28214370	A	C	EFF=INTERGENIC(MODIFIER||||||||)
Gm03	28350914	T	C	EFF=INTERGENIC(MODIFIER||||||||)
Gm03	28807499	C	T	EFF=INTERGENIC(MODIFIER||||||||)
Gm03	29287636	G	A	EFF=INTERGENIC(MODIFIER||||||||)
Gm03	29289224	G	A	EFF=INTERGENIC(MODIFIER||||||||)
Gm03	29830891	G	A	EFF=INTRON(MODIFIER||||Glyma03g23260|mRNA||PAC:16252113|)
Gm03	29891960	CTTTTT	CTTTT	EFF=INTERGENIC(MODIFIER||||||||)
Gm03	29897482	C	CAG	EFF=INTRAGENIC(MODIFIER||||Glyma03g23310|mRNA|||)
Gm03	30101734	A	G	EFF=INTERGENIC(MODIFIER||||||||)
Gm03	30101776	C	T	EFF=INTERGENIC(MODIFIER||||||||)
Gm03	30101793	C	T	EFF=INTERGENIC(MODIFIER||||||||)
Gm03	30101804	A	G	EFF=INTERGENIC(MODIFIER||||||||)
Gm03	30266139	G	A	EFF=INTERGENIC(MODIFIER||||||||)
Gm03	30266196	A	G	EFF=INTERGENIC(MODIFIER||||||||)
Gm03	30266225	C	T	EFF=INTERGENIC(MODIFIER||||||||)
Gm03	30267390	G	A	EFF=INTERGENIC(MODIFIER||||||||)
Gm03	30499341	A	G	EFF=DOWNSTREAM(MODIFIER||||Glyma03g23850|mRNA||PAC:16252149|),DOWNSTREAM(MODIFIER||||Glyma03g23850|mRNA||PAC:16252150|),INTRAGENIC(MODIFIER||||Glyma03g23860|mRNA|||)
Gm03	30793901	G	A	EFF=UTR_3_PRIME(MODIFIER||||Glyma03g24120|mRNA||PAC:16252180|PAC:16252180.exon.3)
Gm03	30793904	T	C	EFF=UTR_3_PRIME(MODIFIER||||Glyma03g24120|mRNA||PAC:16252180|PAC:16252180.exon.3)
Gm03	30816625	A	G	EFF=INTERGENIC(MODIFIER||||||||)
Gm03	30905782	T	A	EFF=UTR_3_PRIME(MODIFIER||||Glyma03g24180|mRNA||PAC:16252185|PAC:16252185.exon.3)
Gm03	30948431	T	C	EFF=DOWNSTREAM(MODIFIER||||Glyma03g24210|mRNA||PAC:16252188|)
Gm03	30951577	G	A	EFF=DOWNSTREAM(MODIFIER||||Glyma03g24210|mRNA||PAC:16252188|)
Gm03	31118867	C	A	EFF=INTERGENIC(MODIFIER||||||||)
Gm03	31167360	G	A	EFF=INTERGENIC(MODIFIER||||||||)
Gm03	31167444	C	T	EFF=INTERGENIC(MODIFIER||||||||)
Gm03	31167462	C	T	EFF=INTERGENIC(MODIFIER||||||||)
Gm03	31167486	T	C	EFF=INTERGENIC(MODIFIER||||||||)
Gm03	31185597	C	T	EFF=DOWNSTREAM(MODIFIER||||Glyma03g24390|mRNA||PAC:16252211|)
Gm03	31185626	A	C	EFF=DOWNSTREAM(MODIFIER||||Glyma03g24390|mRNA||PAC:16252211|)
Gm03	31520344	C	T	EFF=INTERGENIC(MODIFIER||||||||)
Gm03	31566857	T	A	EFF=NON_SYNONYMOUS_CODING(MODERATE|MISSENSE|cTg/cAg|L26Q|Glyma03g24630|mRNA||PAC:16252237|PAC:16252237.exon.1)
Gm03	31706150	C	T	EFF=INTERGENIC(MODIFIER||||||||)
Gm03	31706197	C	A	EFF=INTERGENIC(MODIFIER||||||||)
Gm03	33108442	T	C	EFF=INTRON(MODIFIER||||Glyma03g25790|mRNA||PAC:16252349|),INTRON(MODIFIER||||Glyma03g25790|mRNA||PAC:16252350|),INTRON(MODIFIER||||Glyma03g25790|mRNA||PAC:16252351|),INTRON(MODIFIER||||Glyma03g25790|mRNA||PAC:16252352|)
Gm03	33499320	T	C	EFF=DOWNSTREAM(MODIFIER||||Glyma03g26150|mRNA||PAC:16252370|)
Gm03	33499360	A	G	EFF=DOWNSTREAM(MODIFIER||||Glyma03g26150|mRNA||PAC:16252370|)
Gm03	33990926	G	A	EFF=INTERGENIC(MODIFIER||||||||)
Gm03	34076007	C	T	EFF=INTERGENIC(MODIFIER||||||||)
Gm03	34651871	A	G	EFF=SYNONYMOUS_CODING(LOW|SILENT|Ttg/Ctg|L87|Glyma03g27120|mRNA||PAC:16252466|PAC:16252466.exon.3)
Gm03	34978611	A	C	EFF=SYNONYMOUS_CODING(LOW|SILENT|gcT/gcG|A460|Glyma03g27290|mRNA||PAC:16252486|PAC:16252486.exon.1),SYNONYMOUS_CODING(LOW|SILENT|gcT/gcG|A460|Glyma03g27290|mRNA||PAC:16252487|PAC:16252487.exon.1)
Gm03	34978729	G	T	EFF=NON_SYNONYMOUS_CODING(MODERATE|MISSENSE|gCg/gAg|A421E|Glyma03g27290|mRNA||PAC:16252486|PAC:16252486.exon.1),NON_SYNONYMOUS_CODING(MODERATE|MISSENSE|gCg/gAg|A421E|Glyma03g27290|mRNA||PAC:16252487|PAC:16252487.exon.1)
Gm03	35023534	A	T	EFF=INTERGENIC(MODIFIER||||||||)
Gm03	35195751	T	C	EFF=INTRON(MODIFIER||||Glyma03g27470|mRNA||PAC:16252507|)
Gm03	35195776	T	G	EFF=INTRON(MODIFIER||||Glyma03g27470|mRNA||PAC:16252507|)
Gm03	35323040	C	A	EFF=NON_SYNONYMOUS_CODING(MODERATE|MISSENSE|cGc/cTc|R575L|Glyma03g27590|mRNA||PAC:16252520|PAC:16252520.exon.12)
Gm03	35620545	ACC	AC	EFF=UPSTREAM(MODIFIER||||Glyma03g27840|mRNA||PAC:16252550|)
Gm03	35620572	C	A	EFF=UPSTREAM(MODIFIER||||Glyma03g27840|mRNA||PAC:16252550|)
Gm03	35807399	T	C	EFF=NON_SYNONYMOUS_CODING(MODERATE|MISSENSE|Aag/Gag|K330E|Glyma03g28000|mRNA||PAC:16252569|PAC:16252569.exon.8)
Gm03	35807419	T	A	EFF=NON_SYNONYMOUS_CODING(MODERATE|MISSENSE|cAg/cTg|Q323L|Glyma03g28000|mRNA||PAC:16252569|PAC:16252569.exon.8)
Gm03	36226840	G	T	EFF=NON_SYNONYMOUS_CODING(MODERATE|MISSENSE|aCa/aAa|T123K|Glyma03g28330|mRNA||PAC:16252605|PAC:16252605.exon.1)
Gm03	36263198	T	C	EFF=INTRAGENIC(MODIFIER||||Glyma03g28370|mRNA|||)
Gm03	36263216	A	C	EFF=INTRAGENIC(MODIFIER||||Glyma03g28370|mRNA|||)
Gm03	36272238	T	C	EFF=NON_SYNONYMOUS_CODING(MODERATE|MISSENSE|gTa/gCa|V135A|Glyma03g28380|mRNA||PAC:16252610|PAC:16252610.exon.4),UPSTREAM(MODIFIER||||Glyma03g28390|mRNA||PAC:16252611|)
Gm03	36314684	T	C	EFF=INTRON(MODIFIER||||Glyma03g28410|mRNA||PAC:16252614|),INTRON(MODIFIER||||Glyma03g28410|mRNA||PAC:16252615|)
Gm03	36338381	A	T	EFF=INTERGENIC(MODIFIER||||||||)
Gm03	36417707	A	G	EFF=NON_SYNONYMOUS_CODING(MODERATE|MISSENSE|Aag/Gag|K98E|Glyma03g28490|mRNA||PAC:16252624|PAC:16252624.exon.2),UPSTREAM(MODIFIER||||Glyma03g28500|mRNA||PAC:16252625|)
Gm03	36875151	A	C	EFF=DOWNSTREAM(MODIFIER||||Glyma03g28920|mRNA||PAC:16252668|),SYNONYMOUS_CODING(LOW|SILENT|atA/atC|I53|Glyma03g28910|mRNA||PAC:16252667|PAC:16252667.exon.1)
Gm03	37101662	G	A	EFF=SYNONYMOUS_CODING(LOW|SILENT|ttG/ttA|L475|Glyma03g29150|mRNA||PAC:16252690|PAC:16252690.exon.7)
Gm03	37217340	T	C	EFF=INTRON(MODIFIER||||Glyma03g29230|mRNA||PAC:16252699|)
Gm03	37364552	T	C	EFF=INTRON(MODIFIER||||Glyma03g29370|mRNA||PAC:16252714|)
Gm03	37364557	T	C	EFF=INTRON(MODIFIER||||Glyma03g29370|mRNA||PAC:16252714|)
Gm03	37756068	G	C	EFF=NON_SYNONYMOUS_CODING(MODERATE|MISSENSE|agC/agG|S75R|Glyma03g29710|mRNA||PAC:16252752|PAC:16252752.exon.1),NON_SYNONYMOUS_CODING(MODERATE|MISSENSE|agC/agG|S75R|Glyma03g29710|mRNA||PAC:16252753|PAC:16252753.exon.1),NON_SYNONYMOUS_CODING(MODERATE|MISSENSE|agC/agG|S75R|Glyma03g29710|mRNA||PAC:16252754|PAC:16252754.exon.1),NON_SYNONYMOUS_CODING(MODERATE|MISSENSE|agC/agG|S75R|Glyma03g29710|mRNA||P…
Gm03	37792244	T	TC	EFF=INTERGENIC(MODIFIER||||||||)
Gm03	37861130	T	A	EFF=DOWNSTREAM(MODIFIER||||Glyma03g29840|mRNA||PAC:16252770|),DOWNSTREAM(MODIFIER||||Glyma03g29840|mRNA||PAC:16252771|)
Gm03	38072920	G	C	EFF=UPSTREAM(MODIFIER||||Glyma03g30120|mRNA||PAC:16252807|)
Gm03	38083110	G	C	EFF=DOWNSTREAM(MODIFIER||||Glyma03g30130|mRNA||PAC:16252808|),DOWNSTREAM(MODIFIER||||Glyma03g30130|mRNA||PAC:16252809|),UTR_5_PRIME(MODIFIER||||Glyma03g30140|mRNA||PAC:16252810|PAC:16252810.exon.1)
Gm03	38083798	G	A	EFF=DOWNSTREAM(MODIFIER||||Glyma03g30130|mRNA||PAC:16252808|),DOWNSTREAM(MODIFIER||||Glyma03g30130|mRNA||PAC:16252809|),DOWNSTREAM(MODIFIER||||Glyma03g30150|mRNA||PAC:16252811|),NON_SYNONYMOUS_CODING(MODERATE|MISSENSE|aGa/aAa|R144K|Glyma03g30140|mRNA||PAC:16252810|PAC:16252810.exon.2)
Gm03	38209349	A	G	EFF=INTRON(MODIFIER||||Glyma03g30270|mRNA||PAC:16252825|)
Gm03	38281590	G	A	EFF=DOWNSTREAM(MODIFIER||||Glyma03g30320|mRNA||PAC:16252830|),INTRON(MODIFIER||||Glyma03g30310|mRNA||PAC:16252829|)
Gm03	38335397	A	G	EFF=INTERGENIC(MODIFIER||||||||)
Gm03	38418890	G	T	EFF=NON_SYNONYMOUS_CODING(MODERATE|MISSENSE|Gcc/Tcc|A180S|Glyma03g30460|mRNA||PAC:16252846|PAC:16252846.exon.2)
Gm03	38418957	G	T	EFF=NON_SYNONYMOUS_CODING(MODERATE|MISSENSE|aGg/aTg|R202M|Glyma03g30460|mRNA||PAC:16252846|PAC:16252846.exon.2)
Gm03	38498651	C	G	EFF=DOWNSTREAM(MODIFIER||||Glyma03g30600|mRNA||PAC:16252860|),NON_SYNONYMOUS_CODING(MODERATE|MISSENSE|Gat/Cat|D213H|Glyma03g30590|mRNA||PAC:16252859|PAC:16252859.exon.3)
Gm03	38716206	A	G	EFF=DOWNSTREAM(MODIFIER||||Glyma03g30870|mRNA||PAC:16252888|),DOWNSTREAM(MODIFIER||||Glyma03g30870|mRNA||PAC:16252889|)
Gm03	38721831	A	T	EFF=INTRON(MODIFIER||||Glyma03g30870|mRNA||PAC:16252888|),INTRON(MODIFIER||||Glyma03g30870|mRNA||PAC:16252889|)
Gm03	38721840	A	G	EFF=INTRON(MODIFIER||||Glyma03g30870|mRNA||PAC:16252888|),INTRON(MODIFIER||||Glyma03g30870|mRNA||PAC:16252889|)
Gm03	38966011	A	T	EFF=INTERGENIC(MODIFIER||||||||)
Gm03	39145494	T	C	EFF=INTRON(MODIFIER||||Glyma03g31230|mRNA||PAC:16252930|),UPSTREAM(MODIFIER||||Glyma03g31220|mRNA||PAC:16252929|)
Gm03	39171206	AAGAGAGAGAGAGAGAGAGAGAGAGAGAGAGAGA	AAGAGAGAGAGAGAGAGAGAGAGAGAGAGAGA	EFF=UPSTREAM(MODIFIER||||Glyma03g31270|mRNA||PAC:16252934|)
Gm03	39208606	T	C	EFF=NON_SYNONYMOUS_CODING(MODERATE|MISSENSE|Aca/Gca|T411A|Glyma03g31310|mRNA||PAC:16252937|PAC:16252937.exon.8)
Gm03	39574966	T	C	EFF=INTERGENIC(MODIFIER||||||||)
Gm03	39575074	GAAAAAAAAAAAA	GAAAAAAAAAA	EFF=INTERGENIC(MODIFIER||||||||)
Gm03	39579849	G	A	EFF=INTERGENIC(MODIFIER||||||||)
Gm03	39642709	G	T	EFF=DOWNSTREAM(MODIFIER||||Glyma03g31800|mRNA||PAC:16252993|),DOWNSTREAM(MODIFIER||||Glyma03g31810|mRNA||PAC:16252994|),INTRON(MODIFIER||||Glyma03g31820|mRNA||PAC:16252995|)
Gm03	39842508	G	A	EFF=DOWNSTREAM(MODIFIER||||Glyma03g32040|mRNA||PAC:16253020|),NON_SYNONYMOUS_CODING(MODERATE|MISSENSE|Ctc/Ttc|L51F|Glyma03g32030|mRNA||PAC:16253019|PAC:16253019.exon.1)
Gm03	39842512	T	A	EFF=DOWNSTREAM(MODIFIER||||Glyma03g32040|mRNA||PAC:16253020|),SYNONYMOUS_CODING(LOW|SILENT|ggA/ggT|G49|Glyma03g32030|mRNA||PAC:16253019|PAC:16253019.exon.1)
Gm03	39991826	C	A	EFF=DOWNSTREAM(MODIFIER||||Glyma03g32170|mRNA||PAC:16253035|),INTRON(MODIFIER||||Glyma03g32180|mRNA||PAC:16253036|)
Gm03	40050904	C	A	EFF=INTRON(MODIFIER||||Glyma03g32250|mRNA||PAC:16253043|),UPSTREAM(MODIFIER||||Glyma03g32260|mRNA||PAC:16253044|)
Gm03	40054546	T	A	EFF=UPSTREAM(MODIFIER||||Glyma03g32250|mRNA||PAC:16253043|),UPSTREAM(MODIFIER||||Glyma03g32260|mRNA||PAC:16253044|),UPSTREAM(MODIFIER||||Glyma03g32260|mRNA||PAC:16253045|)
Gm03	40088172	G	A	EFF=DOWNSTREAM(MODIFIER||||Glyma03g32290|mRNA||PAC:16253048|)
Gm03	40204929	G	A	EFF=DOWNSTREAM(MODIFIER||||Glyma03g32480|mRNA||PAC:16253071|),SYNONYMOUS_CODING(LOW|SILENT|gaC/gaT|D577|Glyma03g32470|mRNA||PAC:16253070|PAC:16253070.exon.3)
Gm03	40319253	G	T	EFF=INTRON(MODIFIER||||Glyma03g32590|mRNA||PAC:16253084|),INTRON(MODIFIER||||Glyma03g32590|mRNA||PAC:16253085|),INTRON(MODIFIER||||Glyma03g32590|mRNA||PAC:16253086|),INTRON(MODIFIER||||Glyma03g32590|mRNA||PAC:16253087|)
Gm03	40319419	G	A	EFF=SYNONYMOUS_CODING(LOW|SILENT|acC/acT|T117|Glyma03g32590|mRNA||PAC:16253085|PAC:16253085.exon.6),SYNONYMOUS_CODING(LOW|SILENT|acC/acT|T234|Glyma03g32590|mRNA||PAC:16253086|PAC:16253086.exon.7),SYNONYMOUS_CODING(LOW|SILENT|acC/acT|T241|Glyma03g32590|mRNA||PAC:16253084|PAC:16253084.exon.7),SYNONYMOUS_CODING(LOW|SILENT|acC/acT|T241|Glyma03g32590|mRNA||PAC:16253087|PAC:16253087.exon.7)
Gm03	40338905	ATGTGTG	ATGTG	EFF=INTRON(MODIFIER||||Glyma03g32620|mRNA||PAC:16253090|),INTRON(MODIFIER||||Glyma03g32620|mRNA||PAC:16253091|),INTRON(MODIFIER||||Glyma03g32620|mRNA||PAC:16253092|),INTRON(MODIFIER||||Glyma03g32620|mRNA||PAC:16253093|)
Gm03	40339831	A	G	EFF=SYNONYMOUS_CODING(LOW|SILENT|atT/atC|I558|Glyma03g32620|mRNA||PAC:16253090|PAC:16253090.exon.8),SYNONYMOUS_CODING(LOW|SILENT|atT/atC|I558|Glyma03g32620|mRNA||PAC:16253091|PAC:16253091.exon.8),SYNONYMOUS_CODING(LOW|SILENT|atT/atC|I558|Glyma03g32620|mRNA||PAC:16253092|PAC:16253092.exon.8),SYNONYMOUS_CODING(LOW|SILENT|atT/atC|I558|Glyma03g32620|mRNA||PAC:16253093|PAC:16253093.exon.8)
Gm03	40368585	C	T	EFF=DOWNSTREAM(MODIFIER||||Glyma03g32640|mRNA||PAC:16253095|),INTRON(MODIFIER||||Glyma03g32650|mRNA||PAC:16253096|)
Gm03	40368609	T	A	EFF=DOWNSTREAM(MODIFIER||||Glyma03g32640|mRNA||PAC:16253095|),INTRON(MODIFIER||||Glyma03g32650|mRNA||PAC:16253096|)
Gm03	40371559	A	T	EFF=INTRON(MODIFIER||||Glyma03g32650|mRNA||PAC:16253096|)
Gm03	40371599	T	G	EFF=INTRON(MODIFIER||||Glyma03g32650|mRNA||PAC:16253096|)
Gm03	40462434	G	T	EFF=NON_SYNONYMOUS_CODING(MODERATE|MISSENSE|aGg/aTg|R880M|Glyma03g32680|mRNA||PAC:16253099|PAC:16253099.exon.6)
Gm03	40580920	C	T	EFF=DOWNSTREAM(MODIFIER||||Glyma03g32850|mRNA||PAC:16253117|),DOWNSTREAM(MODIFIER||||Glyma03g32850|mRNA||PAC:16253118|),SYNONYMOUS_CODING(LOW|SILENT|gcC/gcT|A190|Glyma03g32840|mRNA||PAC:16253115|PAC:16253115.exon.2),SYNONYMOUS_CODING(LOW|SILENT|gcC/gcT|A190|Glyma03g32840|mRNA||PAC:16253116|PAC:16253116.exon.2)
Gm03	40593882	G	A	EFF=NON_SYNONYMOUS_CODING(MODERATE|MISSENSE|Gcc/Acc|A94T|Glyma03g32860|mRNA||PAC:16253119|PAC:16253119.exon.1)
Gm03	40593905	C	A	EFF=SYNONYMOUS_CODING(LOW|SILENT|gtC/gtA|V101|Glyma03g32860|mRNA||PAC:16253119|PAC:16253119.exon.1)
Gm03	40593926	G	A	EFF=SYNONYMOUS_CODING(LOW|SILENT|acG/acA|T108|Glyma03g32860|mRNA||PAC:16253119|PAC:16253119.exon.1)
Gm03	40598235	T	A	EFF=DOWNSTREAM(MODIFIER||||Glyma03g32870|mRNA||PAC:16253120|),NON_SYNONYMOUS_CODING(MODERATE|MISSENSE|caT/caA|H548Q|Glyma03g32860|mRNA||PAC:16253119|PAC:16253119.exon.3)
Gm03	40605946	CA	C	EFF=INTERGENIC(MODIFIER||||||||)
Gm03	40616274	C	T	EFF=NON_SYNONYMOUS_CODING(MODERATE|MISSENSE|tCa/tTa|S470L|Glyma03g32890|mRNA||PAC:16253121|PAC:16253121.exon.3)
Gm03	40636181	T	C	EFF=DOWNSTREAM(MODIFIER||||Glyma03g32900|mRNA||PAC:16253122|),NON_SYNONYMOUS_CODING(MODERATE|MISSENSE|Act/Gct|T447A|Glyma03g32910|mRNA||PAC:16253123|PAC:16253123.exon.3)
Gm03	40666661	A	G	EFF=SYNONYMOUS_CODING(LOW|SILENT|ctT/ctC|L446|Glyma03g32950|mRNA||PAC:16253127|PAC:16253127.exon.7),SYNONYMOUS_CODING(LOW|SILENT|ctT/ctC|L446|Glyma03g32950|mRNA||PAC:16253128|PAC:16253128.exon.6),SYNONYMOUS_CODING(LOW|SILENT|ctT/ctC|L446|Glyma03g32950|mRNA||PAC:16253129|PAC:16253129.exon.6),UPSTREAM(MODIFIER||||Glyma03g32940|mRNA||PAC:16253126|),UPSTREAM(MODIFIER||||Glyma03g32960|mRNA||PAC:162531…
Gm03	40730826	T	C	EFF=NON_SYNONYMOUS_CODING(MODERATE|MISSENSE|Agg/Ggg|R108G|Glyma03g33040|mRNA||PAC:16253144|PAC:16253144.exon.5)
Gm03	40732630	A	G	EFF=UTR_5_PRIME(MODIFIER||||Glyma03g33040|mRNA||PAC:16253144|PAC:16253144.exon.1)
Gm03	40896260	G	A	EFF=DOWNSTREAM(MODIFIER||||Glyma03g33240|mRNA||PAC:16253166|),SYNONYMOUS_CODING(LOW|SILENT|ggG/ggA|G622|Glyma03g33250|mRNA||PAC:16253167|PAC:16253167.exon.1),UPSTREAM(MODIFIER||||Glyma03g33260|mRNA||PAC:16253168|)
Gm03	40917429	A	T	EFF=DOWNSTREAM(MODIFIER||||Glyma03g33300|mRNA||PAC:16253175|),NON_SYNONYMOUS_CODING(MODERATE|MISSENSE|gTg/gAg|V23E|Glyma03g33290|mRNA||PAC:16253174|PAC:16253174.exon.1),UPSTREAM(MODIFIER||||Glyma03g33280|mRNA||PAC:16253172|),UPSTREAM(MODIFIER||||Glyma03g33280|mRNA||PAC:16253173|)
Gm03	40917433	A	T	EFF=DOWNSTREAM(MODIFIER||||Glyma03g33300|mRNA||PAC:16253175|),NON_SYNONYMOUS_CODING(MODERATE|MISSENSE|Tta/Ata|L22I|Glyma03g33290|mRNA||PAC:16253174|PAC:16253174.exon.1),UPSTREAM(MODIFIER||||Glyma03g33280|mRNA||PAC:16253172|),UPSTREAM(MODIFIER||||Glyma03g33280|mRNA||PAC:16253173|)
Gm03	40950687	T	G	EFF=DOWNSTREAM(MODIFIER||||Glyma03g33340|mRNA||PAC:16253179|),DOWNSTREAM(MODIFIER||||Glyma03g33340|mRNA||PAC:16253180|),DOWNSTREAM(MODIFIER||||Glyma03g33340|mRNA||PAC:16253181|),DOWNSTREAM(MODIFIER||||Glyma03g33340|mRNA||PAC:16253182|),DOWNSTREAM(MODIFIER||||Glyma03g33350|mRNA||PAC:16253183|),UPSTREAM(MODIFIER||||Glyma03g33360|mRNA||PAC:16253184|)
Gm03	40951063	G	A	EFF=DOWNSTREAM(MODIFIER||||Glyma03g33340|mRNA||PAC:16253182|),DOWNSTREAM(MODIFIER||||Glyma03g33350|mRNA||PAC:16253183|),SYNONYMOUS_CODING(LOW|SILENT|tcG/tcA|S16|Glyma03g33360|mRNA||PAC:16253184|PAC:16253184.exon.1)
Gm03	41078842	C	T	EFF=DOWNSTREAM(MODIFIER||||Glyma03g33520|mRNA||PAC:16253203|),DOWNSTREAM(MODIFIER||||Glyma03g33540|mRNA||PAC:16253206|),INTRON(MODIFIER||||Glyma03g33530|mRNA||PAC:16253204|),INTRON(MODIFIER||||Glyma03g33530|mRNA||PAC:16253205|)
Gm03	41110177	C	T	EFF=DOWNSTREAM(MODIFIER||||Glyma03g33590|mRNA||PAC:16253211|),SYNONYMOUS_CODING(LOW|SILENT|taC/taT|Y116|Glyma03g33580|mRNA||PAC:16253210|PAC:16253210.exon.1),UPSTREAM(MODIFIER||||Glyma03g33570|mRNA||PAC:16253209|)
Gm03	41110933	A	G	EFF=DOWNSTREAM(MODIFIER||||Glyma03g33590|mRNA||PAC:16253211|),SYNONYMOUS_CODING(LOW|SILENT|gtA/gtG|V368|Glyma03g33580|mRNA||PAC:16253210|PAC:16253210.exon.1),UPSTREAM(MODIFIER||||Glyma03g33570|mRNA||PAC:16253209|)
Gm03	41215225	C	T	EFF=UPSTREAM(MODIFIER||||Glyma03g33710|mRNA||PAC:16253225|)
Gm03	41216710	G	T	EFF=INTRON(MODIFIER||||Glyma03g33710|mRNA||PAC:16253225|)
Gm03	41219730	A	C	EFF=DOWNSTREAM(MODIFIER||||Glyma03g33720|mRNA||PAC:16253226|),NON_SYNONYMOUS_CODING(MODERATE|MISSENSE|gaA/gaC|E396D|Glyma03g33710|mRNA||PAC:16253225|PAC:16253225.exon.8)
Gm03	41231547	T	C	EFF=SYNONYMOUS_CODING(LOW|SILENT|aaT/aaC|N100|Glyma03g33740|mRNA||PAC:16253228|PAC:16253228.exon.2),SYNONYMOUS_CODING(LOW|SILENT|aaT/aaC|N100|Glyma03g33740|mRNA||PAC:16253229|PAC:16253229.exon.2),UPSTREAM(MODIFIER||||Glyma03g33730|mRNA||PAC:16253227|)
Gm03	41439688	G	C	EFF=UPSTREAM(MODIFIER||||Glyma03g33940|mRNA||PAC:16253256|),UPSTREAM(MODIFIER||||Glyma03g33950|mRNA||PAC:16253257|)
Gm03	41439838	G	A	EFF=SYNONYMOUS_CODING(LOW|SILENT|tcG/tcA|S50|Glyma03g33950|mRNA||PAC:16253257|PAC:16253257.exon.1),UPSTREAM(MODIFIER||||Glyma03g33940|mRNA||PAC:16253256|)
Gm03	41595526	G	A	EFF=NON_SYNONYMOUS_CODING(MODERATE|MISSENSE|aCg/aTg|T209M|Glyma03g34110|mRNA||PAC:16253273|PAC:16253273.exon.3)
Gm03	41717264	A	G	EFF=NON_SYNONYMOUS_CODING(MODERATE|MISSENSE|cAc/cGc|H213R|Glyma03g34230|mRNA||PAC:16253285|PAC:16253285.exon.1)
Gm03	42027842	C	T	EFF=DOWNSTREAM(MODIFIER||||Glyma03g34670|mRNA||PAC:16253330|),SYNONYMOUS_CODING(LOW|SILENT|aaC/aaT|N30|Glyma03g34680|mRNA||PAC:16253331|PAC:16253331.exon.1),SYNONYMOUS_CODING(LOW|SILENT|aaC/aaT|N30|Glyma03g34680|mRNA||PAC:16253332|PAC:16253332.exon.1)
Gm03	42028651	G	T	EFF=DOWNSTREAM(MODIFIER||||Glyma03g34670|mRNA||PAC:16253330|),NON_SYNONYMOUS_CODING(MODERATE|MISSENSE|gaG/gaT|E256D|Glyma03g34680|mRNA||PAC:16253332|PAC:16253332.exon.2),NON_SYNONYMOUS_CODING(MODERATE|MISSENSE|gaG/gaT|E263D|Glyma03g34680|mRNA||PAC:16253331|PAC:16253331.exon.2),UPSTREAM(MODIFIER||||Glyma03g34700|mRNA||PAC:16253334|)
Gm03	42196596	T	A	EFF=INTRON(MODIFIER||||Glyma03g34890|mRNA||PAC:16253356|)
Gm03	42985425	G	A	EFF=DOWNSTREAM(MODIFIER||||Glyma03g35950|mRNA||PAC:16253477|),SYNONYMOUS_CODING(LOW|SILENT|gtC/gtT|V192|Glyma03g35930|mRNA||PAC:16253475|PAC:16253475.exon.1),UPSTREAM(MODIFIER||||Glyma03g35920|mRNA||PAC:16253474|)
Gm03	43015832	T	A	EFF=DOWNSTREAM(MODIFIER||||Glyma03g36010|mRNA||PAC:16253483|)
Gm03	43015843	A	G	EFF=DOWNSTREAM(MODIFIER||||Glyma03g36010|mRNA||PAC:16253483|)
Gm03	43082909	G	A	EFF=INTERGENIC(MODIFIER||||||||)
Gm03	43389813	T	G	EFF=NON_SYNONYMOUS_CODING(MODERATE|MISSENSE|gTg/gGg|V175G|Glyma03g36430|mRNA||PAC:16253539|PAC:16253539.exon.1),UPSTREAM(MODIFIER||||Glyma03g36420|mRNA||PAC:16253538|)
Gm03	43413749	C	T	EFF=DOWNSTREAM(MODIFIER||||Glyma03g36480|mRNA||PAC:16253544|),SYNONYMOUS_CODING(LOW|SILENT|ggC/ggT|G266|Glyma03g36470|mRNA||PAC:16253543|PAC:16253543.exon.3),UPSTREAM(MODIFIER||||Glyma03g36460|mRNA||PAC:16253542|)
Gm03	43491491	G	C	EFF=NON_SYNONYMOUS_CODING(MODERATE|MISSENSE|atC/atG|I140M|Glyma03g36550|mRNA||PAC:16253554|PAC:16253554.exon.2),NON_SYNONYMOUS_CODING(MODERATE|MISSENSE|atC/atG|I140M|Glyma03g36550|mRNA||PAC:16253555|PAC:16253555.exon.2)
Gm03	43502969	A	T	EFF=DOWNSTREAM(MODIFIER||||Glyma03g36560|mRNA||PAC:16253556|),DOWNSTREAM(MODIFIER||||Glyma03g36570|mRNA||PAC:16253557|)
Gm03	43503000	A	G	EFF=DOWNSTREAM(MODIFIER||||Glyma03g36560|mRNA||PAC:16253556|),DOWNSTREAM(MODIFIER||||Glyma03g36570|mRNA||PAC:16253557|)
Gm03	43608327	ATTG	A	EFF=DOWNSTREAM(MODIFIER||||Glyma03g36740|mRNA||PAC:16253575|),INTRON(MODIFIER||||Glyma03g36740|mRNA||PAC:16253574|)
Gm03	43724045	A	G	EFF=DOWNSTREAM(MODIFIER||||Glyma03g36920|mRNA||PAC:16253597|),NON_SYNONYMOUS_CODING(MODERATE|MISSENSE|aAc/aGc|N727S|Glyma03g36910|mRNA||PAC:16253596|PAC:16253596.exon.14)
Gm03	44026450	G	A	EFF=DOWNSTREAM(MODIFIER||||Glyma03g37410|mRNA||PAC:16253655|),UPSTREAM(MODIFIER||||Glyma03g37400|mRNA||PAC:16253654|)
Gm03	44040447	A	G	EFF=DOWNSTREAM(MODIFIER||||Glyma03g37420|mRNA||PAC:16253656|)
Gm03	44095324	C	T	EFF=NON_SYNONYMOUS_CODING(MODERATE|MISSENSE|Gaa/Aaa|E908K|Glyma03g37500|mRNA||PAC:16253663|PAC:16253663.exon.18),UPSTREAM(MODIFIER||||Glyma03g37490|mRNA||PAC:16253662|)
Gm03	44414677	T	A	EFF=DOWNSTREAM(MODIFIER||||Glyma03g37940|mRNA||PAC:16253712|),INTRON(MODIFIER||||Glyma03g37950|mRNA||PAC:16253713|)
Gm03	44423846	G	A	EFF=SYNONYMOUS_CODING(LOW|SILENT|gtG/gtA|V127|Glyma03g37960|mRNA||PAC:16253714|PAC:16253714.exon.3)
Gm03	44580744	C	T	EFF=SYNONYMOUS_CODING(LOW|SILENT|tcC/tcT|S440|Glyma03g38180|mRNA||PAC:16253738|PAC:16253738.exon.7)
Gm03	44633463	A	G	EFF=DOWNSTREAM(MODIFIER||||Glyma03g38270|mRNA||PAC:16253748|),DOWNSTREAM(MODIFIER||||Glyma03g38280|mRNA||PAC:16253749|)
Gm03	44633542	G	C	EFF=DOWNSTREAM(MODIFIER||||Glyma03g38270|mRNA||PAC:16253748|),DOWNSTREAM(MODIFIER||||Glyma03g38280|mRNA||PAC:16253749|)
Gm03	44691416	C	T	EFF=DOWNSTREAM(MODIFIER||||Glyma03g38340|mRNA||PAC:16253755|)
Gm03	44698953	G	T	EFF=INTRON(MODIFIER||||Glyma03g38350|mRNA||PAC:16253756|),INTRON(MODIFIER||||Glyma03g38350|mRNA||PAC:16253757|),INTRON(MODIFIER||||Glyma03g38350|mRNA||PAC:16253758|)
Gm03	44699039	C	T	EFF=NON_SYNONYMOUS_CODING(MODERATE|MISSENSE|cCa/cTa|P21L|Glyma03g38350|mRNA||PAC:16253756|PAC:16253756.exon.2),NON_SYNONYMOUS_CODING(MODERATE|MISSENSE|cCa/cTa|P21L|Glyma03g38350|mRNA||PAC:16253757|PAC:16253757.exon.2),NON_SYNONYMOUS_CODING(MODERATE|MISSENSE|cCa/cTa|P21L|Glyma03g38350|mRNA||PAC:16253758|PAC:16253758.exon.2)
Gm03	44707441	G	C	EFF=NON_SYNONYMOUS_CODING(MODERATE|MISSENSE|Cct/Gct|P272A|Glyma03g38360|mRNA||PAC:16253759|PAC:16253759.exon.4)
Gm03	44707493	G	C	EFF=NON_SYNONYMOUS_CODING(MODERATE|MISSENSE|agC/agG|S254R|Glyma03g38360|mRNA||PAC:16253759|PAC:16253759.exon.4)
Gm03	44735630	G	A	EFF=SYNONYMOUS_CODING(LOW|SILENT|ctG/ctA|L211|Glyma03g38390|mRNA||PAC:16253762|PAC:16253762.exon.5)
Gm03	44762571	TCAACAACAACAACAACAACAACA	TCAACAACAACAACAACAACAACAACA	EFF=CODON_CHANGE_PLUS_CODON_INSERTION(MODERATE||cag/caACAg|Q436QQ|Glyma03g38410|mRNA||PAC:16253764|PAC:16253764.exon.4)
Gm03	44762583	ACA	ACAGCA	EFF=CODON_CHANGE_PLUS_CODON_INSERTION(MODERATE||caa/caGCAa|Q433QQ|Glyma03g38410|mRNA||PAC:16253764|PAC:16253764.exon.4)
Gm03	44788038	TGAGAGAGAGAGAGAGAGAGAGA	TGAGAGAGAGAGAGAGAGAGA	EFF=INTRON(MODIFIER||||Glyma03g38430|mRNA||PAC:16253767|),INTRON(MODIFIER||||Glyma03g38430|mRNA||PAC:16253768|),SPLICE_SITE_DONOR(HIGH||||Glyma03g38430|mRNA||PAC:16253767|),SPLICE_SITE_DONOR(HIGH||||Glyma03g38430|mRNA||PAC:16253768|)
Gm03	44799953	A	T	EFF=DOWNSTREAM(MODIFIER||||Glyma03g38440|mRNA||PAC:16253769|),DOWNSTREAM(MODIFIER||||Glyma03g38440|mRNA||PAC:16253770|),NON_SYNONYMOUS_CODING(MODERATE|MISSENSE|gTa/gAa|V67E|Glyma03g38450|mRNA||PAC:16253771|PAC:16253771.exon.2)
Gm03	44800002	C	T	EFF=DOWNSTREAM(MODIFIER||||Glyma03g38440|mRNA||PAC:16253769|),DOWNSTREAM(MODIFIER||||Glyma03g38440|mRNA||PAC:16253770|),NON_SYNONYMOUS_CODING(MODERATE|MISSENSE|Gca/Aca|A51T|Glyma03g38450|mRNA||PAC:16253771|PAC:16253771.exon.2)
Gm03	44803215	A	G	EFF=UPSTREAM(MODIFIER||||Glyma03g38450|mRNA||PAC:16253771|)
Gm03	44869427	A	C	EFF=INTRON(MODIFIER||||Glyma03g38530|mRNA||PAC:16253781|)
Gm03	44878226	T	C	EFF=DOWNSTREAM(MODIFIER||||Glyma03g38540|mRNA||PAC:16253782|),SYNONYMOUS_CODING(LOW|SILENT|ggT/ggC|G1101|Glyma03g38530|mRNA||PAC:16253781|PAC:16253781.exon.20)
Gm03	44878312	A	G	EFF=DOWNSTREAM(MODIFIER||||Glyma03g38540|mRNA||PAC:16253782|),INTRON(MODIFIER||||Glyma03g38530|mRNA||PAC:16253781|)
Gm03	44927455	A	G	EFF=NON_SYNONYMOUS_CODING(MODERATE|MISSENSE|Aat/Gat|N328D|Glyma03g38620|mRNA||PAC:16253791|PAC:16253791.exon.2)
Gm03	44985022	G	A	EFF=DOWNSTREAM(MODIFIER||||Glyma03g38670|mRNA||PAC:16253796|)
Gm03	45098253	C	A	EFF=DOWNSTREAM(MODIFIER||||Glyma03g38810|mRNA||PAC:16253814|),INTRON(MODIFIER||||Glyma03g38810|mRNA||PAC:16253811|),INTRON(MODIFIER||||Glyma03g38810|mRNA||PAC:16253812|),INTRON(MODIFIER||||Glyma03g38810|mRNA||PAC:16253813|)
Gm03	45107141	A	C	EFF=NON_SYNONYMOUS_CODING(MODERATE|MISSENSE|cAg/cCg|Q122P|Glyma03g38830|mRNA||PAC:16253816|PAC:16253816.exon.1),NON_SYNONYMOUS_CODING(MODERATE|MISSENSE|cAg/cCg|Q122P|Glyma03g38830|mRNA||PAC:16253817|PAC:16253817.exon.1)
Gm03	45159472	T	C	EFF=DOWNSTREAM(MODIFIER||||Glyma03g38890|mRNA||PAC:16253825|),NON_SYNONYMOUS_CODING(MODERATE|MISSENSE|gTt/gCt|V95A|Glyma03g38880|mRNA||PAC:16253824|PAC:16253824.exon.2)
Gm03	45214571	A	T	EFF=DOWNSTREAM(MODIFIER||||Glyma03g38970|mRNA||PAC:16253833|),SYNONYMOUS_CODING(LOW|SILENT|gcT/gcA|A527|Glyma03g38980|mRNA||PAC:16253834|PAC:16253834.exon.4)
Gm03	45343682	A	G	EFF=SYNONYMOUS_CODING(LOW|SILENT|acT/acC|T175|Glyma03g39150|mRNA||PAC:16253855|PAC:16253855.exon.1)
Gm03	45473183	G	C	EFF=SYNONYMOUS_CODING(LOW|SILENT|cgG/cgC|R360|Glyma03g39350|mRNA||PAC:16253879|PAC:16253879.exon.4),UPSTREAM(MODIFIER||||Glyma03g39360|mRNA||PAC:16253880|)
Gm03	45516926	C	T	EFF=DOWNSTREAM(MODIFIER||||Glyma03g39440|mRNA||PAC:16253891|),UTR_3_PRIME(MODIFIER||||Glyma03g39450|mRNA||PAC:16253892|PAC:16253892.exon.4)
Gm03	45516951	G	A	EFF=DOWNSTREAM(MODIFIER||||Glyma03g39440|mRNA||PAC:16253891|),UTR_3_PRIME(MODIFIER||||Glyma03g39450|mRNA||PAC:16253892|PAC:16253892.exon.4)
Gm03	45524411	G	A	EFF=INTRON(MODIFIER||||Glyma03g39460|mRNA||PAC:16253893|),INTRON(MODIFIER||||Glyma03g39460|mRNA||PAC:16253894|)
Gm03	45604416	TC	TCC	EFF=DOWNSTREAM(MODIFIER||||Glyma03g39590|mRNA||PAC:16253909|)
Gm03	45632717	CTTTTTT	CTTTTT	EFF=UPSTREAM(MODIFIER||||Glyma03g39620|mRNA||PAC:16253912|)
Gm03	45849224	A	G	EFF=SYNONYMOUS_CODING(LOW|SILENT|acT/acC|T455|Glyma03g39950|mRNA||PAC:16253952|PAC:16253952.exon.3)
Gm03	46085422	A	G	EFF=DOWNSTREAM(MODIFIER||||Glyma03g40280|mRNA||PAC:16253997|),DOWNSTREAM(MODIFIER||||Glyma03g40280|mRNA||PAC:16253998|),DOWNSTREAM(MODIFIER||||Glyma03g40280|mRNA||PAC:16253999|),UPSTREAM(MODIFIER||||Glyma03g40290|mRNA||PAC:16254000|),UPSTREAM(MODIFIER||||Glyma03g40300|mRNA||PAC:16254001|)
Gm03	46109897	CGT	CGTTGT	EFF=INTRON(MODIFIER||||Glyma03g40320|mRNA||PAC:16254003|),INTRON(MODIFIER||||Glyma03g40320|mRNA||PAC:16254004|)
Gm03	46147102	G	A	EFF=DOWNSTREAM(MODIFIER||||Glyma03g40360|mRNA||PAC:16254008|),INTRAGENIC(MODIFIER||||Glyma03g40350|mRNA|||)
Gm03	46198651	T	A	EFF=INTRON(MODIFIER||||Glyma03g40440|mRNA||PAC:16254016|),INTRON(MODIFIER||||Glyma03g40440|mRNA||PAC:16254017|),INTRON(MODIFIER||||Glyma03g40440|mRNA||PAC:16254018|),INTRON(MODIFIER||||Glyma03g40440|mRNA||PAC:16254019|)
Gm03	46198658	T	C	EFF=INTRON(MODIFIER||||Glyma03g40440|mRNA||PAC:16254016|),INTRON(MODIFIER||||Glyma03g40440|mRNA||PAC:16254017|),INTRON(MODIFIER||||Glyma03g40440|mRNA||PAC:16254018|),INTRON(MODIFIER||||Glyma03g40440|mRNA||PAC:16254019|)
Gm03	46257229	G	A	EFF=INTRON(MODIFIER||||Glyma03g40530|mRNA||PAC:16254028|),UPSTREAM(MODIFIER||||Glyma03g40520|mRNA||PAC:16254027|)
Gm03	46257269	CAAAAAA	CAAAAA	EFF=INTRON(MODIFIER||||Glyma03g40530|mRNA||PAC:16254028|),UPSTREAM(MODIFIER||||Glyma03g40520|mRNA||PAC:16254027|)
Gm03	46329159	G	A	EFF=DOWNSTREAM(MODIFIER||||Glyma03g40630|mRNA||PAC:16254038|),SYNONYMOUS_CODING(LOW|SILENT|acG/acA|T390|Glyma03g40620|mRNA||PAC:16254037|PAC:16254037.exon.14)
Gm03	46348345	C	T	EFF=SYNONYMOUS_CODING(LOW|SILENT|acG/acA|T259|Glyma03g40660|mRNA||PAC:16254041|PAC:16254041.exon.9)
Gm03	46385141	A	G	EFF=DOWNSTREAM(MODIFIER||||Glyma03g40710|mRNA||PAC:16254046|),SYNONYMOUS_CODING(LOW|SILENT|ggT/ggC|G367|Glyma03g40720|mRNA||PAC:16254047|PAC:16254047.exon.7)
Gm03	46401351	A	G	EFF=DOWNSTREAM(MODIFIER||||Glyma03g40730|mRNA||PAC:16254048|),DOWNSTREAM(MODIFIER||||Glyma03g40750|mRNA||PAC:16254050|),SYNONYMOUS_CODING(LOW|SILENT|caA/caG|Q115|Glyma03g40740|mRNA||PAC:16254049|PAC:16254049.exon.2)
Gm03	46411242	G	C	EFF=SYNONYMOUS_CODING(LOW|SILENT|ctC/ctG|L30|Glyma03g40750|mRNA||PAC:16254050|PAC:16254050.exon.1)
Gm03	46424334	C	T	EFF=SYNONYMOUS_CODING(LOW|SILENT|aaC/aaT|N57|Glyma03g40760|mRNA||PAC:16254051|PAC:16254051.exon.1)
Gm03	46424353	A	G	EFF=NON_SYNONYMOUS_CODING(MODERATE|MISSENSE|Act/Gct|T64A|Glyma03g40760|mRNA||PAC:16254051|PAC:16254051.exon.1)
Gm03	46437774	T	C	EFF=INTRON(MODIFIER||||Glyma03g40780|mRNA||PAC:16254053|),INTRON(MODIFIER||||Glyma03g40780|mRNA||PAC:16254054|)
Gm03	46438949	C	A	EFF=INTRON(MODIFIER||||Glyma03g40780|mRNA||PAC:16254053|),INTRON(MODIFIER||||Glyma03g40780|mRNA||PAC:16254054|)
Gm03	46441284	CAAAA	CAAAAA	EFF=DOWNSTREAM(MODIFIER||||Glyma03g40790|mRNA||PAC:16254055|),INTRON(MODIFIER||||Glyma03g40780|mRNA||PAC:16254053|),INTRON(MODIFIER||||Glyma03g40780|mRNA||PAC:16254054|)
Gm03	46484680	CAAAA	CAAAAA	EFF=DOWNSTREAM(MODIFIER||||Glyma03g40870|mRNA||PAC:16254068|),INTRON(MODIFIER||||Glyma03g40860|mRNA||PAC:16254062|),INTRON(MODIFIER||||Glyma03g40860|mRNA||PAC:16254063|),INTRON(MODIFIER||||Glyma03g40860|mRNA||PAC:16254064|),INTRON(MODIFIER||||Glyma03g40860|mRNA||PAC:16254065|),INTRON(MODIFIER||||Glyma03g40860|mRNA||PAC:16254066|),INTRON(MODIFIER||||Glyma03g40860|mRNA||PAC:16254067|),UPSTREAM(MODI…
Gm03	46552009	G	A	EFF=DOWNSTREAM(MODIFIER||||Glyma03g40960|mRNA||PAC:16254081|),SYNONYMOUS_CODING(LOW|SILENT|tcG/tcA|S1447|Glyma03g40950|mRNA||PAC:16254080|PAC:16254080.exon.36)
Gm03	46570785	T	G	EFF=INTRON(MODIFIER||||Glyma03g40990|mRNA||PAC:16254084|),UPSTREAM(MODIFIER||||Glyma03g40980|mRNA||PAC:16254083|)
Gm03	46579307	C	T	EFF=DOWNSTREAM(MODIFIER||||Glyma03g41010|mRNA||PAC:16254086|)
Gm03	46692706	G	A	EFF=SYNONYMOUS_CODING(LOW|SILENT|Cta/Tta|L195|Glyma03g41160|mRNA||PAC:16254104|PAC:16254104.exon.8)
Gm03	46695674	C	T	EFF=INTRON(MODIFIER||||Glyma03g41160|mRNA||PAC:16254104|)
Gm03	46695682	C	A	EFF=INTRON(MODIFIER||||Glyma03g41160|mRNA||PAC:16254104|)
Gm03	46700563	T	G	EFF=DOWNSTREAM(MODIFIER||||Glyma03g41170|mRNA||PAC:16254105|),UPSTREAM(MODIFIER||||Glyma03g41160|mRNA||PAC:16254104|)
Gm03	46792017	A	C	EFF=INTRON(MODIFIER||||Glyma03g41290|mRNA||PAC:16254121|)
Gm03	46793638	C	T	EFF=SYNONYMOUS_CODING(LOW|SILENT|ccG/ccA|P1554|Glyma03g41290|mRNA||PAC:16254121|PAC:16254121.exon.33)
Gm03	46824087	G	A	EFF=SYNONYMOUS_CODING(LOW|SILENT|tcG/tcA|S275|Glyma03g41310|mRNA||PAC:16254123|PAC:16254123.exon.4)
Gm03	46917962	G	A	EFF=DOWNSTREAM(MODIFIER||||Glyma03g41430|mRNA||PAC:16254136|),DOWNSTREAM(MODIFIER||||Glyma03g41440|mRNA||PAC:16254137|),INTRON(MODIFIER||||Glyma03g41450|mRNA||PAC:16254138|)
Gm03	46996373	A	T	EFF=NON_SYNONYMOUS_CODING(MODERATE|MISSENSE|gTt/gAt|V269D|Glyma03g41570|mRNA||PAC:16254149|PAC:16254149.exon.5),UPSTREAM(MODIFIER||||Glyma03g41560|mRNA||PAC:16254148|)
Gm03	47074881	A	G	EFF=DOWNSTREAM(MODIFIER||||Glyma03g41680|mRNA||PAC:16254165|),DOWNSTREAM(MODIFIER||||Glyma03g41680|mRNA||PAC:16254166|),DOWNSTREAM(MODIFIER||||Glyma03g41680|mRNA||PAC:16254167|),DOWNSTREAM(MODIFIER||||Glyma03g41680|mRNA||PAC:16254168|),INTRON(MODIFIER||||Glyma03g41670|mRNA||PAC:16254163|),INTRON(MODIFIER||||Glyma03g41670|mRNA||PAC:16254164|)
Gm03	47126660	C	G	EFF=DOWNSTREAM(MODIFIER||||Glyma03g41710|mRNA||PAC:16254172|),INTRAGENIC(MODIFIER||||Glyma03g41720|mRNA|||)
Gm03	47135347	T	C	EFF=UPSTREAM(MODIFIER||||Glyma03g41730|mRNA||PAC:16254174|)
Gm03	47135381	C	T	EFF=UPSTREAM(MODIFIER||||Glyma03g41730|mRNA||PAC:16254174|)
Gm03	47140161	G	A	EFF=SYNONYMOUS_CODING(LOW|SILENT|caG/caA|Q234|Glyma03g41730|mRNA||PAC:16254174|PAC:16254174.exon.1)
Gm03	47161790	A	G	EFF=NON_SYNONYMOUS_CODING(MODERATE|MISSENSE|Tca/Cca|S248P|Glyma03g41760|mRNA||PAC:16254177|PAC:16254177.exon.7),UPSTREAM(MODIFIER||||Glyma03g41750|mRNA||PAC:16254176|)
Gm03	47207267	CTT	CT	EFF=UPSTREAM(MODIFIER||||Glyma03g41830|mRNA||PAC:16254184|),UPSTREAM(MODIFIER||||Glyma03g41850|mRNA||PAC:16254186|)
Gm03	47207427	C	T	EFF=UPSTREAM(MODIFIER||||Glyma03g41830|mRNA||PAC:16254184|),UPSTREAM(MODIFIER||||Glyma03g41850|mRNA||PAC:16254186|)
Gm03	47211112	G	T	EFF=DOWNSTREAM(MODIFIER||||Glyma03g41860|mRNA||PAC:16254187|),DOWNSTREAM(MODIFIER||||Glyma03g41860|mRNA||PAC:16254188|),NON_SYNONYMOUS_CODING(MODERATE|MISSENSE|gaG/gaT|E168D|Glyma03g41850|mRNA||PAC:16254186|PAC:16254186.exon.1)
Gm03	47236467	A	G	EFF=SYNONYMOUS_CODING(LOW|SILENT|caT/caC|H94|Glyma03g41880|mRNA||PAC:16254190|PAC:16254190.exon.1)
Gm03	47236477	T	A	EFF=NON_SYNONYMOUS_CODING(MODERATE|MISSENSE|aAc/aTc|N91I|Glyma03g41880|mRNA||PAC:16254190|PAC:16254190.exon.1)
Gm03	47253547	C	A	EFF=DOWNSTREAM(MODIFIER||||Glyma03g41900|mRNA||PAC:16254192|)
Gm03	47255201	T	C	EFF=SYNONYMOUS_CODING(LOW|SILENT|gaA/gaG|E111|Glyma03g41900|mRNA||PAC:16254192|PAC:16254192.exon.1)
Gm03	47387912	T	G	EFF=UPSTREAM(MODIFIER||||Glyma03g42090|mRNA||PAC:16254215|)
Gm03	47388062	A	G	EFF=UPSTREAM(MODIFIER||||Glyma03g42090|mRNA||PAC:16254215|)
Gm03	47396732	G	A	EFF=DOWNSTREAM(MODIFIER||||Glyma03g42090|mRNA||PAC:16254215|),INTRON(MODIFIER||||Glyma03g42100|mRNA||PAC:16254216|)
Gm03	47434721	T	A	EFF=DOWNSTREAM(MODIFIER||||Glyma03g42160|mRNA||PAC:16254224|),INTRON(MODIFIER||||Glyma03g42150|mRNA||PAC:16254222|),INTRON(MODIFIER||||Glyma03g42150|mRNA||PAC:16254223|)
Gm03	47522931	C	T	EFF=DOWNSTREAM(MODIFIER||||Glyma03g42270|mRNA||PAC:16254243|),DOWNSTREAM(MODIFIER||||Glyma03g42280|mRNA||PAC:16254244|),SYNONYMOUS_CODING(LOW|SILENT|caG/caA|Q1761|Glyma03g42290|mRNA||PAC:16254245|PAC:16254245.exon.22),SYNONYMOUS_CODING(LOW|SILENT|caG/caA|Q1761|Glyma03g42290|mRNA||PAC:16254246|PAC:16254246.exon.22)
Gm03	47533075	G	A	EFF=SYNONYMOUS_CODING(LOW|SILENT|ccC/ccT|P110|Glyma03g42290|mRNA||PAC:16254245|PAC:16254245.exon.3),SYNONYMOUS_CODING(LOW|SILENT|ccC/ccT|P110|Glyma03g42290|mRNA||PAC:16254246|PAC:16254246.exon.3)
Gm03	47742979	A	G	EFF=INTRON(MODIFIER||||Glyma03g42530|mRNA||PAC:16254278|)
Gm04	82283	A	C	EFF=DOWNSTREAM(MODIFIER||||Glyma04g00250|mRNA||PAC:16254319|),UPSTREAM(MODIFIER||||Glyma04g00270|mRNA||PAC:16254321|)
Gm04	134340	T	A	EFF=UPSTREAM(MODIFIER||||Glyma04g00330|mRNA||PAC:16254327|)
Gm04	134351	C	T	EFF=UPSTREAM(MODIFIER||||Glyma04g00330|mRNA||PAC:16254327|)
Gm04	134451	G	A	EFF=UPSTREAM(MODIFIER||||Glyma04g00330|mRNA||PAC:16254327|)
Gm04	134457	T	G	EFF=UPSTREAM(MODIFIER||||Glyma04g00330|mRNA||PAC:16254327|)
Gm04	140128	C	T	EFF=DOWNSTREAM(MODIFIER||||Glyma04g00330|mRNA||PAC:16254327|),SYNONYMOUS_CODING(LOW|SILENT|agC/agT|S10|Glyma04g00340|mRNA||PAC:16254328|PAC:16254328.exon.1)
Gm04	177506	T	TGCA	EFF=DOWNSTREAM(MODIFIER||||Glyma04g00400|mRNA||PAC:16254336|),UPSTREAM(MODIFIER||||Glyma04g00390|mRNA||PAC:16254335|)
Gm04	345622	T	C	EFF=DOWNSTREAM(MODIFIER||||Glyma04g00590|mRNA||PAC:16254356|),UPSTREAM(MODIFIER||||Glyma04g00600|mRNA||PAC:16254357|)
Gm04	361046	C	A	EFF=DOWNSTREAM(MODIFIER||||Glyma04g00610|mRNA||PAC:16254358|),DOWNSTREAM(MODIFIER||||Glyma04g00630|mRNA||PAC:16254360|)
Gm04	386079	C	T	EFF=DOWNSTREAM(MODIFIER||||Glyma04g00680|mRNA||PAC:16254365|),NON_SYNONYMOUS_CODING(MODERATE|MISSENSE|Gag/Aag|E127K|Glyma04g00670|mRNA||PAC:16254364|PAC:16254364.exon.1)
Gm04	427756	T	G	EFF=DOWNSTREAM(MODIFIER||||Glyma04g00750|mRNA||PAC:16254372|),DOWNSTREAM(MODIFIER||||Glyma04g00770|mRNA||PAC:16254374|),DOWNSTREAM(MODIFIER||||Glyma04g00770|mRNA||PAC:16254375|),DOWNSTREAM(MODIFIER||||Glyma04g00770|mRNA||PAC:16254376|),DOWNSTREAM(MODIFIER||||Glyma04g00770|mRNA||PAC:16254377|),DOWNSTREAM(MODIFIER||||Glyma04g00770|mRNA||PAC:16254378|),DOWNSTREAM(MODIFIER||||Glyma04g00770|mRNA||PAC:…
Gm04	942435	A	C	EFF=NON_SYNONYMOUS_CODING(MODERATE|MISSENSE|Aag/Cag|K418Q|Glyma04g01440|mRNA||PAC:16254467|PAC:16254467.exon.7),UPSTREAM(MODIFIER||||Glyma04g01450|mRNA||PAC:16254468|)
Gm04	942452	C	A	EFF=SYNONYMOUS_CODING(LOW|SILENT|acC/acA|T423|Glyma04g01440|mRNA||PAC:16254467|PAC:16254467.exon.7),UPSTREAM(MODIFIER||||Glyma04g01450|mRNA||PAC:16254468|)
Gm04	998776	C	T	EFF=DOWNSTREAM(MODIFIER||||Glyma04g01530|mRNA||PAC:16254476|),SYNONYMOUS_CODING(LOW|SILENT|gaC/gaT|D225|Glyma04g01520|mRNA||PAC:16254475|PAC:16254475.exon.4)
Gm04	998792	C	G	EFF=DOWNSTREAM(MODIFIER||||Glyma04g01530|mRNA||PAC:16254476|),NON_SYNONYMOUS_CODING(MODERATE|MISSENSE|Cct/Gct|P231A|Glyma04g01520|mRNA||PAC:16254475|PAC:16254475.exon.4)
Gm04	1001089	ATTT	AT	EFF=DOWNSTREAM(MODIFIER||||Glyma04g01520|mRNA||PAC:16254475|),FRAME_SHIFT(HIGH||||Glyma04g01530|mRNA||PAC:16254476|PAC:16254476.exon.8)
Gm04	1014470	C	T	EFF=SYNONYMOUS_CODING(LOW|SILENT|aaC/aaT|N1041|Glyma04g01540|mRNA||PAC:16254477|PAC:16254477.exon.12)
Gm04	1048338	C	T	EFF=DOWNSTREAM(MODIFIER||||Glyma04g01560|mRNA||PAC:16254479|)
Gm04	1112656	GCCTCCTCCTCCTCCT	GCCTCCTCCTCCT	EFF=CODON_DELETION(MODERATE||cct/-|P387-|Glyma04g01660|mRNA||PAC:16254495|PAC:16254495.exon.3),DOWNSTREAM(MODIFIER||||Glyma04g01670|mRNA||PAC:16254496|)
Gm04	1126451	A	G	EFF=DOWNSTREAM(MODIFIER||||Glyma04g01690|mRNA||PAC:16254498|),SYNONYMOUS_CODING(LOW|SILENT|cgT/cgC|R139|Glyma04g01680|mRNA||PAC:16254497|PAC:16254497.exon.1)
Gm04	1166739	T	C	EFF=DOWNSTREAM(MODIFIER||||Glyma04g01740|mRNA||PAC:16254506|),UPSTREAM(MODIFIER||||Glyma04g01750|mRNA||PAC:16254507|),UPSTREAM(MODIFIER||||Glyma04g01750|mRNA||PAC:16254508|)
Gm04	1166760	C	G	EFF=DOWNSTREAM(MODIFIER||||Glyma04g01740|mRNA||PAC:16254506|),UTR_5_PRIME(MODIFIER||||Glyma04g01750|mRNA||PAC:16254507|PAC:16254507.exon.1),UTR_5_PRIME(MODIFIER||||Glyma04g01750|mRNA||PAC:16254508|PAC:16254508.exon.1)
Gm04	1166768	A	G	EFF=DOWNSTREAM(MODIFIER||||Glyma04g01740|mRNA||PAC:16254506|),UTR_5_PRIME(MODIFIER||||Glyma04g01750|mRNA||PAC:16254507|PAC:16254507.exon.1),UTR_5_PRIME(MODIFIER||||Glyma04g01750|mRNA||PAC:16254508|PAC:16254508.exon.1)
Gm04	1356002	C	T	EFF=DOWNSTREAM(MODIFIER||||Glyma04g01970|mRNA||PAC:16254540|),NON_SYNONYMOUS_CODING(MODERATE|MISSENSE|Gca/Aca|A654T|Glyma04g01980|mRNA||PAC:16254542|PAC:16254542.exon.4),UPSTREAM(MODIFIER||||Glyma04g01990|mRNA||PAC:16254543|),UTR_3_PRIME(MODIFIER||||Glyma04g01980|mRNA||PAC:16254541|PAC:16254541.exon.3)
Gm04	2026998	A	G	EFF=DOWNSTREAM(MODIFIER||||Glyma04g02830|mRNA||PAC:16254642|),NON_SYNONYMOUS_CODING(MODERATE|MISSENSE|tTc/tCc|F142S|Glyma04g02820|mRNA||PAC:16254641|PAC:16254641.exon.4),UPSTREAM(MODIFIER||||Glyma04g02810|mRNA||PAC:16254640|)
Gm04	2027010	T	C	EFF=DOWNSTREAM(MODIFIER||||Glyma04g02830|mRNA||PAC:16254642|),NON_SYNONYMOUS_CODING(MODERATE|MISSENSE|gAt/gGt|D138G|Glyma04g02820|mRNA||PAC:16254641|PAC:16254641.exon.4),UPSTREAM(MODIFIER||||Glyma04g02810|mRNA||PAC:16254640|)
Gm04	2059649	G	A	EFF=SYNONYMOUS_CODING(LOW|SILENT|ttC/ttT|F457|Glyma04g02850|mRNA||PAC:16254644|PAC:16254644.exon.5),UTR_3_PRIME(MODIFIER||||Glyma04g02850|mRNA||PAC:16254645|PAC:16254645.exon.5)
Gm04	2084294	C	G	EFF=SYNONYMOUS_CODING(LOW|SILENT|gcG/gcC|A46|Glyma04g02880|mRNA||PAC:16254648|PAC:16254648.exon.1)
Gm04	2084510	C	G	EFF=UPSTREAM(MODIFIER||||Glyma04g02880|mRNA||PAC:16254648|)
Gm04	2096203	C	G	EFF=UPSTREAM(MODIFIER||||Glyma04g02900|mRNA||PAC:16254650|),UPSTREAM(MODIFIER||||Glyma04g02900|mRNA||PAC:16254651|)
Gm04	2096232	C	G	EFF=UPSTREAM(MODIFIER||||Glyma04g02900|mRNA||PAC:16254650|),UPSTREAM(MODIFIER||||Glyma04g02900|mRNA||PAC:16254651|)
Gm04	2123254	G	A	EFF=UPSTREAM(MODIFIER||||Glyma04g02930|mRNA||PAC:16254654|)
Gm04	2150362	A	C	EFF=NON_SYNONYMOUS_CODING(MODERATE|MISSENSE|gTg/gGg|V493G|Glyma04g02970|mRNA||PAC:16254659|PAC:16254659.exon.7)
Gm04	2150543	A	T	EFF=NON_SYNONYMOUS_CODING(MODERATE|MISSENSE|Tct/Act|S456T|Glyma04g02970|mRNA||PAC:16254659|PAC:16254659.exon.6)
Gm04	2150597	A	G	EFF=INTRON(MODIFIER||||Glyma04g02970|mRNA||PAC:16254659|)
Gm04	2164798	T	C	EFF=SYNONYMOUS_CODING(LOW|SILENT|ccA/ccG|P253|Glyma04g02990|mRNA||PAC:16254661|PAC:16254661.exon.1)
Gm04	2178602	C	T	EFF=SYNONYMOUS_CODING(LOW|SILENT|tgC/tgT|C130|Glyma04g03000|mRNA||PAC:16254662|PAC:16254662.exon.1)
Gm04	2248246	CAAAAAAAAAAA	CAAAAAAAAA	EFF=INTRON(MODIFIER||||Glyma04g03080|mRNA||PAC:16254672|),INTRON(MODIFIER||||Glyma04g03080|mRNA||PAC:16254673|),UPSTREAM(MODIFIER||||Glyma04g03070|mRNA||PAC:16254671|),UPSTREAM(MODIFIER||||Glyma04g03090|mRNA||PAC:16254674|)
Gm04	2248297	T	G	EFF=NON_SYNONYMOUS_CODING(MODERATE|MISSENSE|aaA/aaC|K127N|Glyma04g03080|mRNA||PAC:16254672|PAC:16254672.exon.4),NON_SYNONYMOUS_CODING(MODERATE|MISSENSE|aaA/aaC|K74N|Glyma04g03080|mRNA||PAC:16254673|PAC:16254673.exon.4),UPSTREAM(MODIFIER||||Glyma04g03090|mRNA||PAC:16254674|)
Gm04	2305726	C	A	EFF=NON_SYNONYMOUS_CODING(MODERATE|MISSENSE|tCt/tAt|S8Y|Glyma04g03150|mRNA||PAC:16254680|PAC:16254680.exon.2),UPSTREAM(MODIFIER||||Glyma04g03140|mRNA||PAC:16254679|)
Gm04	2344414	T	C	EFF=DOWNSTREAM(MODIFIER||||Glyma04g03210|mRNA||PAC:16254686|)
Gm04	2572149	CCATCA	CCA	EFF=CODON_DELETION(MODERATE||tca/-|S454-|Glyma04g03540|mRNA||PAC:16254730|PAC:16254730.exon.6),DOWNSTREAM(MODIFIER||||Glyma04g03530|mRNA||PAC:16254729|),UPSTREAM(MODIFIER||||Glyma04g03550|mRNA||PAC:16254731|)
Gm04	2583409	TAAAAAA	TAAAAAAA	EFF=UTR_3_PRIME(MODIFIER||||Glyma04g03550|mRNA||PAC:16254731|PAC:16254731.exon.16)
Gm04	2583474	C	T	EFF=UTR_3_PRIME(MODIFIER||||Glyma04g03550|mRNA||PAC:16254731|PAC:16254731.exon.16)
Gm04	2605154	G	A	EFF=INTERGENIC(MODIFIER||||||||)
Gm04	2705839	C	G	EFF=INTRAGENIC(MODIFIER||||Glyma04g03690|mRNA|||),SYNONYMOUS_CODING(LOW|SILENT|ctG/ctC|L62|Glyma04g03700|mRNA||PAC:16254750|PAC:16254750.exon.1)
Gm04	2730241	A	G	EFF=DOWNSTREAM(MODIFIER||||Glyma04g03710|mRNA||PAC:16254751|),DOWNSTREAM(MODIFIER||||Glyma04g03720|mRNA||PAC:16254752|),INTRAGENIC(MODIFIER||||Glyma04g03730|mRNA|||)
Gm04	2730282	G	A	EFF=DOWNSTREAM(MODIFIER||||Glyma04g03710|mRNA||PAC:16254751|),DOWNSTREAM(MODIFIER||||Glyma04g03720|mRNA||PAC:16254752|),INTRAGENIC(MODIFIER||||Glyma04g03730|mRNA|||)
Gm04	2764293	A	T	EFF=DOWNSTREAM(MODIFIER||||Glyma04g03790|mRNA||PAC:16254759|),NON_SYNONYMOUS_CODING(MODERATE|MISSENSE|gTg/gAg|V133E|Glyma04g03780|mRNA||PAC:16254758|PAC:16254758.exon.1)
Gm04	2776235	G	C	EFF=UPSTREAM(MODIFIER||||Glyma04g03800|mRNA||PAC:16254760|),UPSTREAM(MODIFIER||||Glyma04g03810|mRNA||PAC:16254761|),UPSTREAM(MODIFIER||||Glyma04g03810|mRNA||PAC:16254762|)
Gm04	2776244	G	A	EFF=UPSTREAM(MODIFIER||||Glyma04g03800|mRNA||PAC:16254760|),UPSTREAM(MODIFIER||||Glyma04g03810|mRNA||PAC:16254761|),UPSTREAM(MODIFIER||||Glyma04g03810|mRNA||PAC:16254762|)
Gm04	2785783	G	C	EFF=DOWNSTREAM(MODIFIER||||Glyma04g03810|mRNA||PAC:16254761|),DOWNSTREAM(MODIFIER||||Glyma04g03810|mRNA||PAC:16254762|),SYNONYMOUS_CODING(LOW|SILENT|tcC/tcG|S82|Glyma04g03820|mRNA||PAC:16254763|PAC:16254763.exon.1)
Gm04	2791785	T	C	EFF=NON_SYNONYMOUS_CODING(MODERATE|MISSENSE|cTg/cCg|L92P|Glyma04g03840|mRNA||PAC:16254765|PAC:16254765.exon.1),NON_SYNONYMOUS_CODING(MODERATE|MISSENSE|cTg/cCg|L92P|Glyma04g03840|mRNA||PAC:16254766|PAC:16254766.exon.1),NON_SYNONYMOUS_CODING(MODERATE|MISSENSE|cTg/cCg|L92P|Glyma04g03840|mRNA||PAC:16254767|PAC:16254767.exon.1),NON_SYNONYMOUS_CODING(MODERATE|MISSENSE|cTg/cCg|L92P|Glyma04g03840|mRNA||P…
Gm04	2927205	T	C	EFF=INTRON(MODIFIER||||Glyma04g04000|mRNA||PAC:16254788|),UPSTREAM(MODIFIER||||Glyma04g03990|mRNA||PAC:16254787|)
Gm04	2927233	G	A	EFF=INTRON(MODIFIER||||Glyma04g04000|mRNA||PAC:16254788|),UPSTREAM(MODIFIER||||Glyma04g03990|mRNA||PAC:16254787|)
Gm04	2967689	A	T	EFF=DOWNSTREAM(MODIFIER||||Glyma04g04040|mRNA||PAC:16254792|)
Gm04	2967760	G	A	EFF=DOWNSTREAM(MODIFIER||||Glyma04g04040|mRNA||PAC:16254792|)
Gm04	3157990	G	A	EFF=SYNONYMOUS_CODING(LOW|SILENT|caC/caT|H258|Glyma04g04240|mRNA||PAC:16254817|PAC:16254817.exon.1)
Gm04	3239146	G	A	EFF=INTERGENIC(MODIFIER||||||||)
Gm04	3259704	A	T	EFF=DOWNSTREAM(MODIFIER||||Glyma04g04390|mRNA||PAC:16254832|),INTRON(MODIFIER||||Glyma04g04380|mRNA||PAC:16254831|)
Gm04	3401462	TAA	TA	EFF=UPSTREAM(MODIFIER||||Glyma04g04540|mRNA||PAC:16254849|)
Gm04	3464372	T	C	EFF=UPSTREAM(MODIFIER||||Glyma04g04660|mRNA||PAC:16254862|)
Gm04	3674231	G	C	EFF=INTRON(MODIFIER||||Glyma04g04920|mRNA||PAC:16254890|),INTRON(MODIFIER||||Glyma04g04920|mRNA||PAC:16254891|)
Gm04	3678742	C	T	EFF=INTRON(MODIFIER||||Glyma04g04920|mRNA||PAC:16254890|),INTRON(MODIFIER||||Glyma04g04920|mRNA||PAC:16254891|)
Gm04	3722529	G	A	EFF=UPSTREAM(MODIFIER||||Glyma04g04980|mRNA||PAC:16254897|)
Gm04	4015115	G	A	EFF=INTRON(MODIFIER||||Glyma04g05260|mRNA||PAC:16254932|)
Gm04	4044663	G	A	EFF=UPSTREAM(MODIFIER||||Glyma04g05290|mRNA||PAC:16254935|)
Gm04	4056920	T	C	EFF=DOWNSTREAM(MODIFIER||||Glyma04g05320|mRNA||PAC:16254938|),SYNONYMOUS_CODING(LOW|SILENT|caA/caG|Q414|Glyma04g05330|mRNA||PAC:16254939|PAC:16254939.exon.7)
Gm04	4056943	G	A	EFF=DOWNSTREAM(MODIFIER||||Glyma04g05320|mRNA||PAC:16254938|),NON_SYNONYMOUS_CODING(MODERATE|MISSENSE|Cca/Tca|P407S|Glyma04g05330|mRNA||PAC:16254939|PAC:16254939.exon.7)
Gm04	4057190	T	C	EFF=DOWNSTREAM(MODIFIER||||Glyma04g05320|mRNA||PAC:16254938|),SYNONYMOUS_CODING(LOW|SILENT|gcA/gcG|A342|Glyma04g05330|mRNA||PAC:16254939|PAC:16254939.exon.6)
Gm04	4136107	A	G	EFF=DOWNSTREAM(MODIFIER||||Glyma04g05460|mRNA||PAC:16254954|)
Gm04	4336490	A	C	EFF=DOWNSTREAM(MODIFIER||||Glyma04g05680|mRNA||PAC:16254983|),DOWNSTREAM(MODIFIER||||Glyma04g05680|mRNA||PAC:16254984|),DOWNSTREAM(MODIFIER||||Glyma04g05690|mRNA||PAC:16254985|)
Gm04	4382930	C	T	EFF=DOWNSTREAM(MODIFIER||||Glyma04g05760|mRNA||PAC:16254992|),UPSTREAM(MODIFIER||||Glyma04g05750|mRNA||PAC:16254991|)
Gm04	4470864	G	C	EFF=DOWNSTREAM(MODIFIER||||Glyma04g05880|mRNA||PAC:16255005|),INTRON(MODIFIER||||Glyma04g05870|mRNA||PAC:16255004|)
Gm04	4560846	T	A	EFF=NON_SYNONYMOUS_CODING(MODERATE|MISSENSE|Atg/Ttg|M129L|Glyma04g05970|mRNA||PAC:16255016|PAC:16255016.exon.1)
Gm04	4584276	T	C	EFF=UTR_5_PRIME(MODIFIER||||Glyma04g06010|mRNA||PAC:16255021|PAC:16255021.exon.2)
Gm04	4652165	G	T	EFF=SYNONYMOUS_CODING(LOW|SILENT|acC/acA|T67|Glyma04g06100|mRNA||PAC:16255029|PAC:16255029.exon.1)
Gm04	5141574	CA	CAA	EFF=FRAME_SHIFT(HIGH||||Glyma04g06680|mRNA||PAC:16255096|PAC:16255096.exon.1)
Gm04	5228761	A	G	EFF=DOWNSTREAM(MODIFIER||||Glyma04g06770|mRNA||PAC:16255105|),SYNONYMOUS_CODING(LOW|SILENT|acT/acC|T847|Glyma04g06780|mRNA||PAC:16255106|PAC:16255106.exon.13)
Gm04	5230138	G	T	EFF=DOWNSTREAM(MODIFIER||||Glyma04g06770|mRNA||PAC:16255105|),SYNONYMOUS_CODING(LOW|SILENT|gcC/gcA|A580|Glyma04g06780|mRNA||PAC:16255106|PAC:16255106.exon.10)
Gm04	5304979	G	T	EFF=INTRON(MODIFIER||||Glyma04g06850|mRNA||PAC:16255115|),UPSTREAM(MODIFIER||||Glyma04g06860|mRNA||PAC:16255116|)
Gm04	5366517	C	G	EFF=SYNONYMOUS_CODING(LOW|SILENT|tcG/tcC|S152|Glyma04g06940|mRNA||PAC:16255125|PAC:16255125.exon.1),UPSTREAM(MODIFIER||||Glyma04g06930|mRNA||PAC:16255123|)
Gm04	5543370	T	C	EFF=UPSTREAM(MODIFIER||||Glyma04g07120|mRNA||PAC:16255143|),UPSTREAM(MODIFIER||||Glyma04g07120|mRNA||PAC:16255144|)
Gm04	5980748	T	G	EFF=INTRAGENIC(MODIFIER||||Glyma04g07640|mRNA|||)
Gm04	6074463	T	C	EFF=DOWNSTREAM(MODIFIER||||Glyma04g07790|mRNA||PAC:16255233|),INTRON(MODIFIER||||Glyma04g07780|mRNA||PAC:16255232|)
Gm04	6074480	A	G	EFF=DOWNSTREAM(MODIFIER||||Glyma04g07790|mRNA||PAC:16255233|),SYNONYMOUS_CODING(LOW|SILENT|ggA/ggG|G122|Glyma04g07780|mRNA||PAC:16255232|PAC:16255232.exon.5)
Gm04	6085016	G	A	EFF=SYNONYMOUS_CODING(LOW|SILENT|gcC/gcT|A1502|Glyma04g07810|mRNA||PAC:16255235|PAC:16255235.exon.14)
Gm04	6089140	C	T	EFF=DOWNSTREAM(MODIFIER||||Glyma04g07820|mRNA||PAC:16255236|),NON_SYNONYMOUS_CODING(MODERATE|MISSENSE|Gtc/Atc|V673I|Glyma04g07810|mRNA||PAC:16255235|PAC:16255235.exon.9)
Gm04	6278467	C	T	EFF=INTRON(MODIFIER||||Glyma04g08040|mRNA||PAC:16255261|)
Gm04	6345579	A	G	EFF=INTRON(MODIFIER||||Glyma04g08100|mRNA||PAC:16255267|)
Gm04	6348176	C	T	EFF=UPSTREAM(MODIFIER||||Glyma04g08100|mRNA||PAC:16255267|)
Gm04	6378126	A	G	EFF=DOWNSTREAM(MODIFIER||||Glyma04g08140|mRNA||PAC:16255271|),UTR_3_PRIME(MODIFIER||||Glyma04g08130|mRNA||PAC:16255270|PAC:16255270.exon.13)
Gm04	6422525	T	A	EFF=NON_SYNONYMOUS_CODING(MODERATE|MISSENSE|cTc/cAc|L214H|Glyma04g08190|mRNA||PAC:16255276|PAC:16255276.exon.9),UPSTREAM(MODIFIER||||Glyma04g08200|mRNA||PAC:16255277|)
Gm04	6470841	A	T	EFF=NON_SYNONYMOUS_CODING(MODERATE|MISSENSE|aAg/aTg|K141M|Glyma04g08280|mRNA||PAC:16255286|PAC:16255286.exon.2)
Gm04	6508133	C	G	EFF=INTERGENIC(MODIFIER||||||||)
Gm04	6508155	A	C	EFF=INTERGENIC(MODIFIER||||||||)
Gm04	6508171	C	T	EFF=INTERGENIC(MODIFIER||||||||)
Gm04	6548908	TAGAGAGAGAGAGAGAGAG	TAGAGAGAGAGAGAGAG	EFF=INTERGENIC(MODIFIER||||||||)
Gm04	6582807	C	A	EFF=INTRON(MODIFIER||||Glyma04g08410|mRNA||PAC:16255301|)
Gm04	6586152	C	G	EFF=UPSTREAM(MODIFIER||||Glyma04g08410|mRNA||PAC:16255301|)
Gm04	6633223	C	T	EFF=DOWNSTREAM(MODIFIER||||Glyma04g08460|mRNA||PAC:16255307|),INTRON(MODIFIER||||Glyma04g08460|mRNA||PAC:16255306|)
Gm04	6633272	C	T	EFF=DOWNSTREAM(MODIFIER||||Glyma04g08460|mRNA||PAC:16255307|),INTRON(MODIFIER||||Glyma04g08460|mRNA||PAC:16255306|)
Gm04	6711204	T	C	EFF=DOWNSTREAM(MODIFIER||||Glyma04g08570|mRNA||PAC:16255320|),INTRON(MODIFIER||||Glyma04g08560|mRNA||PAC:16255319|)
Gm04	6777789	ATTTTTTTTTT	ATTTTTTTTTTTT	EFF=INTERGENIC(MODIFIER||||||||)
Gm04	6891759	C	T	EFF=DOWNSTREAM(MODIFIER||||Glyma04g08770|mRNA||PAC:16255342|),NON_SYNONYMOUS_CODING(MODERATE|MISSENSE|Ccc/Tcc|P191S|Glyma04g08760|mRNA||PAC:16255341|PAC:16255341.exon.4)
Gm04	6927858	A	C	EFF=DOWNSTREAM(MODIFIER||||Glyma04g08800|mRNA||PAC:16255344|),DOWNSTREAM(MODIFIER||||Glyma04g08800|mRNA||PAC:16255345|),DOWNSTREAM(MODIFIER||||Glyma04g08820|mRNA||PAC:16255347|),INTRAGENIC(MODIFIER||||Glyma04g08810|mRNA|||)
Gm04	6927874	A	C	EFF=DOWNSTREAM(MODIFIER||||Glyma04g08800|mRNA||PAC:16255344|),DOWNSTREAM(MODIFIER||||Glyma04g08800|mRNA||PAC:16255345|),DOWNSTREAM(MODIFIER||||Glyma04g08820|mRNA||PAC:16255347|),INTRAGENIC(MODIFIER||||Glyma04g08810|mRNA|||)
Gm04	6968027	T	A	EFF=UPSTREAM(MODIFIER||||Glyma04g08860|mRNA||PAC:16255351|)
Gm04	6982922	T	A	EFF=DOWNSTREAM(MODIFIER||||Glyma04g08870|mRNA||PAC:16255352|),UPSTREAM(MODIFIER||||Glyma04g08880|mRNA||PAC:16255353|)
Gm04	6982959	CAGAG	CAG	EFF=DOWNSTREAM(MODIFIER||||Glyma04g08870|mRNA||PAC:16255352|),UPSTREAM(MODIFIER||||Glyma04g08880|mRNA||PAC:16255353|)
Gm04	6985084	A	G	EFF=NON_SYNONYMOUS_CODING(MODERATE|MISSENSE|gAt/gGt|D110G|Glyma04g08880|mRNA||PAC:16255353|PAC:16255353.exon.1)
Gm04	7129569	A	T	EFF=UPSTREAM(MODIFIER||||Glyma04g08990|mRNA||PAC:16255364|)
Gm04	7129615	A	G	EFF=UPSTREAM(MODIFIER||||Glyma04g08990|mRNA||PAC:16255364|)
Gm04	7148509	ATTTTTTTT	ATTTTTT	EFF=UPSTREAM(MODIFIER||||Glyma04g09000|mRNA||PAC:16255365|)
Gm04	7237550	G	A	EFF=INTRON(MODIFIER||||Glyma04g09070|mRNA||PAC:16255372|),INTRON(MODIFIER||||Glyma04g09070|mRNA||PAC:16255373|)
Gm04	7238710	C	A	EFF=INTRON(MODIFIER||||Glyma04g09070|mRNA||PAC:16255372|),INTRON(MODIFIER||||Glyma04g09070|mRNA||PAC:16255373|)
Gm04	7241830	T	A	EFF=DOWNSTREAM(MODIFIER||||Glyma04g09070|mRNA||PAC:16255373|),INTRON(MODIFIER||||Glyma04g09070|mRNA||PAC:16255372|)
Gm04	7302653	G	A	EFF=INTRAGENIC(MODIFIER||||Glyma04g09150|mRNA|||)
Gm04	7702962	T	A	EFF=NON_SYNONYMOUS_CODING(MODERATE|MISSENSE|Ttc/Atc|F101I|Glyma04g09470|mRNA||PAC:16255421|PAC:16255421.exon.1)
Gm04	7884137	C	A	EFF=DOWNSTREAM(MODIFIER||||Glyma04g09590|mRNA||PAC:16255433|),INTRON(MODIFIER||||Glyma04g09600|mRNA||PAC:16255434|)
Gm04	7884146	G	A	EFF=DOWNSTREAM(MODIFIER||||Glyma04g09590|mRNA||PAC:16255433|),INTRON(MODIFIER||||Glyma04g09600|mRNA||PAC:16255434|)
Gm04	7918139	A	T	EFF=SYNONYMOUS_CODING(LOW|SILENT|acA/acT|T74|Glyma04g09630|mRNA||PAC:16255437|PAC:16255437.exon.1)
Gm04	7919877	G	A	EFF=SYNONYMOUS_CODING(LOW|SILENT|gtG/gtA|V473|Glyma04g09630|mRNA||PAC:16255437|PAC:16255437.exon.4)
Gm04	7951145	C	G	EFF=INTRON(MODIFIER||||Glyma04g09670|mRNA||PAC:16255441|),UPSTREAM(MODIFIER||||Glyma04g09680|mRNA||PAC:16255442|)
Gm04	8019197	C	A	EFF=INTRON(MODIFIER||||Glyma04g09730|mRNA||PAC:16255447|),INTRON(MODIFIER||||Glyma04g09730|mRNA||PAC:16255448|)
Gm04	8019220	T	C	EFF=INTRON(MODIFIER||||Glyma04g09730|mRNA||PAC:16255447|),INTRON(MODIFIER||||Glyma04g09730|mRNA||PAC:16255448|)
Gm04	8165197	A	G	EFF=NON_SYNONYMOUS_CODING(MODERATE|MISSENSE|Aat/Gat|N337D|Glyma04g09890|mRNA||PAC:16255467|PAC:16255467.exon.10),NON_SYNONYMOUS_CODING(MODERATE|MISSENSE|Aat/Gat|N337D|Glyma04g09890|mRNA||PAC:16255468|PAC:16255468.exon.10),NON_SYNONYMOUS_CODING(MODERATE|MISSENSE|Aat/Gat|N337D|Glyma04g09890|mRNA||PAC:16255469|PAC:16255469.exon.10)
Gm04	8171228	G	A	EFF=INTRON(MODIFIER||||Glyma04g09890|mRNA||PAC:16255467|),INTRON(MODIFIER||||Glyma04g09890|mRNA||PAC:16255468|),INTRON(MODIFIER||||Glyma04g09890|mRNA||PAC:16255469|)
Gm04	8198125	C	T	EFF=SYNONYMOUS_CODING(LOW|SILENT|cgC/cgT|R101|Glyma04g09910|mRNA||PAC:16255471|PAC:16255471.exon.1),SYNONYMOUS_CODING(LOW|SILENT|cgC/cgT|R101|Glyma04g09910|mRNA||PAC:16255472|PAC:16255472.exon.1)
Gm04	8219084	T	A	EFF=SYNONYMOUS_CODING(LOW|SILENT|ggA/ggT|G159|Glyma04g09920|mRNA||PAC:16255473|PAC:16255473.exon.3),UPSTREAM(MODIFIER||||Glyma04g09930|mRNA||PAC:16255474|)
Gm04	8219407	C	A	EFF=INTRON(MODIFIER||||Glyma04g09920|mRNA||PAC:16255473|),UPSTREAM(MODIFIER||||Glyma04g09930|mRNA||PAC:16255474|)
Gm04	8247807	C	T	EFF=NON_SYNONYMOUS_CODING(MODERATE|MISSENSE|Ggc/Agc|G510S|Glyma04g09960|mRNA||PAC:16255481|PAC:16255481.exon.12),UPSTREAM(MODIFIER||||Glyma04g09950|mRNA||PAC:16255476|),UPSTREAM(MODIFIER||||Glyma04g09950|mRNA||PAC:16255477|),UPSTREAM(MODIFIER||||Glyma04g09950|mRNA||PAC:16255478|),UPSTREAM(MODIFIER||||Glyma04g09950|mRNA||PAC:16255479|),UPSTREAM(MODIFIER||||Glyma04g09950|mRNA||PAC:16255480|)
Gm04	8247949	C	T	EFF=INTRON(MODIFIER||||Glyma04g09960|mRNA||PAC:16255481|),UPSTREAM(MODIFIER||||Glyma04g09950|mRNA||PAC:16255476|),UPSTREAM(MODIFIER||||Glyma04g09950|mRNA||PAC:16255477|),UPSTREAM(MODIFIER||||Glyma04g09950|mRNA||PAC:16255478|),UPSTREAM(MODIFIER||||Glyma04g09950|mRNA||PAC:16255479|),UPSTREAM(MODIFIER||||Glyma04g09950|mRNA||PAC:16255480|)
Gm04	8287787	G	C	EFF=NON_SYNONYMOUS_CODING(MODERATE|MISSENSE|Gag/Cag|E169Q|Glyma04g10030|mRNA||PAC:16255488|PAC:16255488.exon.1),UPSTREAM(MODIFIER||||Glyma04g10040|mRNA||PAC:16255489|)
Gm04	8297381	A	T	EFF=DOWNSTREAM(MODIFIER||||Glyma04g10050|mRNA||PAC:16255490|),UTR_3_PRIME(MODIFIER||||Glyma04g10040|mRNA||PAC:16255489|PAC:16255489.exon.10)
Gm04	8323692	G	C	EFF=SYNONYMOUS_CODING(LOW|SILENT|tcC/tcG|S572|Glyma04g10060|mRNA||PAC:16255491|PAC:16255491.exon.15),SYNONYMOUS_CODING(LOW|SILENT|tcC/tcG|S572|Glyma04g10060|mRNA||PAC:16255492|PAC:16255492.exon.14)
Gm04	8366370	G	A	EFF=UPSTREAM(MODIFIER||||Glyma04g10100|mRNA||PAC:16255496|),UPSTREAM(MODIFIER||||Glyma04g10100|mRNA||PAC:16255497|),UPSTREAM(MODIFIER||||Glyma04g10100|mRNA||PAC:16255498|),UPSTREAM(MODIFIER||||Glyma04g10100|mRNA||PAC:16255499|)
Gm04	8398382	A	G	EFF=UPSTREAM(MODIFIER||||Glyma04g10160|mRNA||PAC:16255506|)
Gm04	8450659	C	G	EFF=INTRON(MODIFIER||||Glyma04g10230|mRNA||PAC:16255513|)
Gm04	8474292	T	G	EFF=NON_SYNONYMOUS_CODING(MODERATE|MISSENSE|agA/agC|R130S|Glyma04g10270|mRNA||PAC:16255517|PAC:16255517.exon.1)
Gm04	8503014	T	C	EFF=INTERGENIC(MODIFIER||||||||)
Gm04	8522259	C	T	EFF=INTRON(MODIFIER||||Glyma04g10300|mRNA||PAC:16255519|)
Gm04	8522308	A	T	EFF=INTRON(MODIFIER||||Glyma04g10300|mRNA||PAC:16255519|)
Gm04	8522311	G	A	EFF=INTRON(MODIFIER||||Glyma04g10300|mRNA||PAC:16255519|)
Gm04	8541434	T	C	EFF=INTRON(MODIFIER||||Glyma04g10320|mRNA||PAC:16255520|)
Gm04	8545023	G	A	EFF=INTRON(MODIFIER||||Glyma04g10320|mRNA||PAC:16255520|)
Gm04	8545050	G	T	EFF=INTRON(MODIFIER||||Glyma04g10320|mRNA||PAC:16255520|)
Gm04	8547535	C	A	EFF=INTRON(MODIFIER||||Glyma04g10320|mRNA||PAC:16255520|)
Gm04	8547537	T	G	EFF=INTRON(MODIFIER||||Glyma04g10320|mRNA||PAC:16255520|)
Gm04	8547583	A	G	EFF=INTRON(MODIFIER||||Glyma04g10320|mRNA||PAC:16255520|)
Gm04	8572816	A	C	EFF=INTRON(MODIFIER||||Glyma04g10340|mRNA||PAC:16255522|)
Gm04	8572864	G	T	EFF=INTRON(MODIFIER||||Glyma04g10340|mRNA||PAC:16255522|)
Gm04	8709080	A	G	EFF=INTRAGENIC(MODIFIER||||Glyma04g10490|mRNA|||)
Gm04	8711098	A	G	EFF=INTERGENIC(MODIFIER||||||||)
Gm04	8715605	A	T	EFF=INTERGENIC(MODIFIER||||||||)
Gm04	8810705	A	C	EFF=SYNONYMOUS_CODING(LOW|SILENT|ggT/ggG|G292|Glyma04g10610|mRNA||PAC:16255545|PAC:16255545.exon.1)
Gm04	8928933	C	A	EFF=INTERGENIC(MODIFIER||||||||)
Gm04	8929025	C	T	EFF=INTERGENIC(MODIFIER||||||||)
Gm04	8929338	C	T	EFF=INTERGENIC(MODIFIER||||||||)
Gm04	8941528	A	G	EFF=INTERGENIC(MODIFIER||||||||)
Gm04	8949557	T	A	EFF=INTRON(MODIFIER||||Glyma04g10700|mRNA||PAC:16255553|)
Gm04	9205043	TGGAGGA	TGGA	EFF=CODON_DELETION(MODERATE||tcc/-|S645-|Glyma04g10940|mRNA||PAC:16255583|PAC:16255583.exon.4),DOWNSTREAM(MODIFIER||||Glyma04g10930|mRNA||PAC:16255582|),UTR_3_PRIME(MODIFIER||||Glyma04g10940|mRNA||PAC:16255584|PAC:16255584.exon.3)
Gm04	9206289	G	A	EFF=DOWNSTREAM(MODIFIER||||Glyma04g10930|mRNA||PAC:16255582|),SYNONYMOUS_CODING(LOW|SILENT|caC/caT|H305|Glyma04g10940|mRNA||PAC:16255583|PAC:16255583.exon.2),SYNONYMOUS_CODING(LOW|SILENT|caC/caT|H305|Glyma04g10940|mRNA||PAC:16255584|PAC:16255584.exon.2)
Gm04	9573826	C	G	EFF=INTERGENIC(MODIFIER||||||||)
Gm04	9591690	T	C	EFF=INTERGENIC(MODIFIER||||||||)
Gm04	9687918	T	C	EFF=INTERGENIC(MODIFIER||||||||)
Gm04	9903141	C	A	EFF=INTERGENIC(MODIFIER||||||||)
Gm04	10131454	C	A	EFF=INTERGENIC(MODIFIER||||||||)
Gm04	10131525	A	T	EFF=INTERGENIC(MODIFIER||||||||)
Gm04	10131585	T	G	EFF=INTERGENIC(MODIFIER||||||||)
Gm04	10146471	G	A	EFF=INTERGENIC(MODIFIER||||||||)
Gm04	10162696	A	T	EFF=INTERGENIC(MODIFIER||||||||)
Gm04	10194478	A	G	EFF=INTERGENIC(MODIFIER||||||||)
Gm04	10194531	T	A	EFF=INTERGENIC(MODIFIER||||||||)
Gm04	10226812	A	G	EFF=INTERGENIC(MODIFIER||||||||)
Gm04	10297575	C	T	EFF=UPSTREAM(MODIFIER||||Glyma04g11670|mRNA||PAC:16255661|)
Gm04	10363205	A	G	EFF=INTERGENIC(MODIFIER||||||||)
Gm04	10363538	G	A	EFF=INTERGENIC(MODIFIER||||||||)
Gm04	10363561	T	C	EFF=INTERGENIC(MODIFIER||||||||)
Gm04	10423173	T	G	EFF=INTERGENIC(MODIFIER||||||||)
Gm04	10555466	C	T	EFF=INTERGENIC(MODIFIER||||||||)
Gm04	10570668	G	A	EFF=INTERGENIC(MODIFIER||||||||)
Gm04	10597425	A	G	EFF=INTERGENIC(MODIFIER||||||||)
Gm04	10636660	T	C	EFF=UPSTREAM(MODIFIER||||Glyma04g11890|mRNA||PAC:16255682|)
Gm04	10769186	A	G	EFF=INTERGENIC(MODIFIER||||||||)
Gm04	10804244	G	T	EFF=INTERGENIC(MODIFIER||||||||)
Gm04	10995209	C	G	EFF=INTERGENIC(MODIFIER||||||||)
Gm04	10996252	T	C	EFF=INTERGENIC(MODIFIER||||||||)
Gm04	11061143	T	A	EFF=SYNONYMOUS_CODING(LOW|SILENT|gcA/gcT|A1362|Glyma04g12100|mRNA||PAC:16255701|PAC:16255701.exon.7)
Gm04	11130093	G	C	EFF=DOWNSTREAM(MODIFIER||||Glyma04g12150|mRNA||PAC:16255707|)
Gm04	11333078	G	A	EFF=INTERGENIC(MODIFIER||||||||)
Gm04	11333089	A	G	EFF=INTERGENIC(MODIFIER||||||||)
Gm04	11333102	T	G	EFF=INTERGENIC(MODIFIER||||||||)
Gm04	11347719	G	A	EFF=DOWNSTREAM(MODIFIER||||Glyma04g12320|mRNA||PAC:16255724|),DOWNSTREAM(MODIFIER||||Glyma04g12320|mRNA||PAC:16255725|)
Gm04	11450117	CCACAC	CCAC	EFF=UPSTREAM(MODIFIER||||Glyma04g12370|mRNA||PAC:16255731|)
Gm04	11561389	T	G	EFF=DOWNSTREAM(MODIFIER||||Glyma04g12480|mRNA||PAC:16255742|),DOWNSTREAM(MODIFIER||||Glyma04g12480|mRNA||PAC:16255743|),UTR_3_PRIME(MODIFIER||||Glyma04g12490|mRNA||PAC:16255744|PAC:16255744.exon.11),UTR_3_PRIME(MODIFIER||||Glyma04g12490|mRNA||PAC:16255745|PAC:16255745.exon.12)
Gm04	11568212	G	T	EFF=INTRON(MODIFIER||||Glyma04g12490|mRNA||PAC:16255744|),INTRON(MODIFIER||||Glyma04g12490|mRNA||PAC:16255745|)
Gm04	11568239	A	G	EFF=INTRON(MODIFIER||||Glyma04g12490|mRNA||PAC:16255744|),INTRON(MODIFIER||||Glyma04g12490|mRNA||PAC:16255745|)
Gm04	11571057	G	A	EFF=SYNONYMOUS_CODING(LOW|SILENT|ggC/ggT|G43|Glyma04g12490|mRNA||PAC:16255744|PAC:16255744.exon.1),SYNONYMOUS_CODING(LOW|SILENT|ggC/ggT|G43|Glyma04g12490|mRNA||PAC:16255745|PAC:16255745.exon.1)
Gm04	11571171	G	C	EFF=SYNONYMOUS_CODING(LOW|SILENT|ctC/ctG|L5|Glyma04g12490|mRNA||PAC:16255744|PAC:16255744.exon.1),SYNONYMOUS_CODING(LOW|SILENT|ctC/ctG|L5|Glyma04g12490|mRNA||PAC:16255745|PAC:16255745.exon.1)
Gm04	11596136	C	A	EFF=INTRON(MODIFIER||||Glyma04g12500|mRNA||PAC:16255746|),UPSTREAM(MODIFIER||||Glyma04g12510|mRNA||PAC:16255747|)
Gm04	11679029	G	A	EFF=INTERGENIC(MODIFIER||||||||)
Gm04	11872692	T	A	EFF=DOWNSTREAM(MODIFIER||||Glyma04g12620|mRNA||PAC:16255756|),SYNONYMOUS_CODING(LOW|SILENT|acT/acA|T449|Glyma04g12610|mRNA||PAC:16255755|PAC:16255755.exon.3)
Gm04	11872743	T	G	EFF=DOWNSTREAM(MODIFIER||||Glyma04g12620|mRNA||PAC:16255756|),SYNONYMOUS_CODING(LOW|SILENT|ccT/ccG|P466|Glyma04g12610|mRNA||PAC:16255755|PAC:16255755.exon.3)
Gm04	11913824	ATTTTT	ATTTT	EFF=INTERGENIC(MODIFIER||||||||)
Gm04	11957847	CTT	CT	EFF=INTRON(MODIFIER||||Glyma04g12680|mRNA||PAC:16255762|)
Gm04	11965213	C	G	EFF=UPSTREAM(MODIFIER||||Glyma04g12680|mRNA||PAC:16255762|)
Gm04	12011731	A	G	EFF=INTERGENIC(MODIFIER||||||||)
Gm04	12011744	C	G	EFF=INTERGENIC(MODIFIER||||||||)
Gm04	12042329	G	C	EFF=INTERGENIC(MODIFIER||||||||)
Gm04	12043647	T	C	EFF=INTERGENIC(MODIFIER||||||||)
Gm04	12124259	G	T	EFF=INTERGENIC(MODIFIER||||||||)
Gm04	12125757	T	C	EFF=INTERGENIC(MODIFIER||||||||)
Gm04	12131441	G	A	EFF=INTERGENIC(MODIFIER||||||||)
Gm04	12180670	A	G	EFF=NON_SYNONYMOUS_CODING(MODERATE|MISSENSE|Tca/Cca|S694P|Glyma04g12830|mRNA||PAC:16255774|PAC:16255774.exon.6)
Gm04	12287032	T	C	EFF=INTRON(MODIFIER||||Glyma04g12890|mRNA||PAC:16255779|)
Gm04	12428915	C	A	EFF=INTERGENIC(MODIFIER||||||||)
Gm04	13209618	C	T	EFF=INTERGENIC(MODIFIER||||||||)
Gm04	13422294	A	C	EFF=SYNONYMOUS_CODING(LOW|SILENT|tcT/tcG|S561|Glyma04g13670|mRNA||PAC:16255837|PAC:16255837.exon.9)
Gm04	13565262	C	T	EFF=INTERGENIC(MODIFIER||||||||)
Gm04	13565293	A	G	EFF=INTERGENIC(MODIFIER||||||||)
Gm04	13603446	A	T	EFF=INTRON(MODIFIER||||Glyma04g13880|mRNA||PAC:16255839|),INTRON(MODIFIER||||Glyma04g13880|mRNA||PAC:16255840|)
Gm04	13952081	G	A	EFF=INTERGENIC(MODIFIER||||||||)
Gm04	14170715	T	A	EFF=INTRON(MODIFIER||||Glyma04g14280|mRNA||PAC:16255860|)
Gm04	14170798	G	A	EFF=INTRON(MODIFIER||||Glyma04g14280|mRNA||PAC:16255860|)
Gm04	14240864	C	T	EFF=DOWNSTREAM(MODIFIER||||Glyma04g14320|mRNA||PAC:16255864|),UPSTREAM(MODIFIER||||Glyma04g14330|mRNA||PAC:16255865|)
Gm04	14339762	G	A	EFF=INTERGENIC(MODIFIER||||||||)
Gm04	14359525	A	C	EFF=INTERGENIC(MODIFIER||||||||)
Gm04	14394896	G	A	EFF=INTERGENIC(MODIFIER||||||||)
Gm04	14827787	C	A	EFF=SYNONYMOUS_CODING(LOW|SILENT|cgG/cgT|R8|Glyma04g14680|mRNA||PAC:16255899|PAC:16255899.exon.1)
Gm04	14910210	A	C	EFF=DOWNSTREAM(MODIFIER||||Glyma04g14700|mRNA||PAC:16255900|),DOWNSTREAM(MODIFIER||||Glyma04g14710|mRNA||PAC:16255901|),DOWNSTREAM(MODIFIER||||Glyma04g14710|mRNA||PAC:16255902|),DOWNSTREAM(MODIFIER||||Glyma04g14710|mRNA||PAC:16255903|),DOWNSTREAM(MODIFIER||||Glyma04g14710|mRNA||PAC:16255904|),DOWNSTREAM(MODIFIER||||Glyma04g14710|mRNA||PAC:16255905|)
Gm04	14910420	A	G	EFF=DOWNSTREAM(MODIFIER||||Glyma04g14700|mRNA||PAC:16255900|),DOWNSTREAM(MODIFIER||||Glyma04g14710|mRNA||PAC:16255901|),DOWNSTREAM(MODIFIER||||Glyma04g14710|mRNA||PAC:16255902|),DOWNSTREAM(MODIFIER||||Glyma04g14710|mRNA||PAC:16255903|),DOWNSTREAM(MODIFIER||||Glyma04g14710|mRNA||PAC:16255904|),DOWNSTREAM(MODIFIER||||Glyma04g14710|mRNA||PAC:16255905|)
Gm04	14910969	A	T	EFF=DOWNSTREAM(MODIFIER||||Glyma04g14700|mRNA||PAC:16255900|),DOWNSTREAM(MODIFIER||||Glyma04g14710|mRNA||PAC:16255901|),DOWNSTREAM(MODIFIER||||Glyma04g14710|mRNA||PAC:16255902|),DOWNSTREAM(MODIFIER||||Glyma04g14710|mRNA||PAC:16255903|),DOWNSTREAM(MODIFIER||||Glyma04g14710|mRNA||PAC:16255904|),DOWNSTREAM(MODIFIER||||Glyma04g14710|mRNA||PAC:16255905|)
Gm04	14924324	G	A	EFF=INTRAGENIC(MODIFIER||||Glyma04g14730|mRNA|||)
Gm04	14927108	G	A	EFF=INTRAGENIC(MODIFIER||||Glyma04g14730|mRNA|||)
Gm04	14945880	A	G	EFF=INTERGENIC(MODIFIER||||||||)
Gm04	14947450	G	C	EFF=INTERGENIC(MODIFIER||||||||)
Gm04	15058249	C	A	EFF=INTRON(MODIFIER||||Glyma04g14850|mRNA||PAC:16255919|),INTRON(MODIFIER||||Glyma04g14850|mRNA||PAC:16255920|)
Gm04	15210923	A	G	EFF=INTRAGENIC(MODIFIER||||Glyma04g14900|mRNA|||)
Gm04	15211004	T	C	EFF=INTERGENIC(MODIFIER||||||||)
Gm04	15211039	C	A	EFF=INTERGENIC(MODIFIER||||||||)
Gm04	15211095	A	G	EFF=INTERGENIC(MODIFIER||||||||)
Gm04	15211217	G	A	EFF=INTERGENIC(MODIFIER||||||||)
Gm04	15211486	C	T	EFF=INTERGENIC(MODIFIER||||||||)
Gm04	15930731	T	C	EFF=INTERGENIC(MODIFIER||||||||)
Gm04	15930858	G	A	EFF=INTERGENIC(MODIFIER||||||||)
Gm04	15969147	T	A	EFF=INTERGENIC(MODIFIER||||||||)
Gm04	16501730	T	C	EFF=INTERGENIC(MODIFIER||||||||)
Gm04	16501765	G	A	EFF=INTERGENIC(MODIFIER||||||||)
Gm04	16584249	G	A	EFF=INTERGENIC(MODIFIER||||||||)
Gm04	16911888	G	A	EFF=INTERGENIC(MODIFIER||||||||)
Gm04	17087711	C	T	EFF=INTERGENIC(MODIFIER||||||||)
Gm04	17262255	C	T	EFF=INTRON(MODIFIER||||Glyma04g16190|mRNA||PAC:16256029|)
Gm04	17265541	A	G	EFF=INTRON(MODIFIER||||Glyma04g16190|mRNA||PAC:16256029|)
Gm04	17277708	T	C	EFF=INTERGENIC(MODIFIER||||||||)
Gm04	17277748	C	T	EFF=INTERGENIC(MODIFIER||||||||)
Gm04	17284584	G	A	EFF=INTERGENIC(MODIFIER||||||||)
Gm04	17459044	T	A	EFF=DOWNSTREAM(MODIFIER||||Glyma04g16340|mRNA||PAC:16256041|),DOWNSTREAM(MODIFIER||||Glyma04g16350|mRNA||PAC:16256042|),DOWNSTREAM(MODIFIER||||Glyma04g16350|mRNA||PAC:16256043|),INTRON(MODIFIER||||Glyma04g16340|mRNA||PAC:16256040|)
Gm04	17460027	G	A	EFF=DOWNSTREAM(MODIFIER||||Glyma04g16340|mRNA||PAC:16256041|),DOWNSTREAM(MODIFIER||||Glyma04g16350|mRNA||PAC:16256042|),DOWNSTREAM(MODIFIER||||Glyma04g16350|mRNA||PAC:16256043|),NON_SYNONYMOUS_CODING(MODERATE|MISSENSE|Gct/Act|A746T|Glyma04g16340|mRNA||PAC:16256040|PAC:16256040.exon.20)
Gm04	17507261	C	A	EFF=UPSTREAM(MODIFIER||||Glyma04g16360|mRNA||PAC:16256044|)
Gm04	17701124	G	T	EFF=INTERGENIC(MODIFIER||||||||)
Gm04	17737593	A	C	EFF=DOWNSTREAM(MODIFIER||||Glyma04g16640|mRNA||PAC:16256053|)
Gm04	17737640	G	T	EFF=DOWNSTREAM(MODIFIER||||Glyma04g16640|mRNA||PAC:16256053|)
Gm04	18005970	C	T	EFF=INTERGENIC(MODIFIER||||||||)
Gm04	18052564	T	C	EFF=DOWNSTREAM(MODIFIER||||Glyma04g16850|mRNA||PAC:16256071|)
Gm04	18135073	G	T	EFF=INTERGENIC(MODIFIER||||||||)
Gm04	18305025	C	A	EFF=INTERGENIC(MODIFIER||||||||)
Gm04	18307416	T	G	EFF=INTERGENIC(MODIFIER||||||||)
Gm04	18307473	T	C	EFF=INTERGENIC(MODIFIER||||||||)
Gm04	18424246	G	A	EFF=INTRON(MODIFIER||||Glyma04g17050|mRNA||PAC:16256089|)
Gm04	18504864	G	T	EFF=INTERGENIC(MODIFIER||||||||)
Gm04	18619574	G	A	EFF=INTERGENIC(MODIFIER||||||||)
Gm04	18836765	G	A	EFF=INTERGENIC(MODIFIER||||||||)
Gm04	18842651	C	A	EFF=INTERGENIC(MODIFIER||||||||)
Gm04	18842689	T	A	EFF=INTERGENIC(MODIFIER||||||||)
Gm04	18945792	A	G	EFF=INTERGENIC(MODIFIER||||||||)
Gm04	18945844	A	G	EFF=INTERGENIC(MODIFIER||||||||)
Gm04	18945923	A	G	EFF=INTERGENIC(MODIFIER||||||||)
Gm04	18945979	G	A	EFF=INTERGENIC(MODIFIER||||||||)
Gm04	19001130	A	G	EFF=INTERGENIC(MODIFIER||||||||)
Gm04	19411668	G	A	EFF=INTERGENIC(MODIFIER||||||||)
Gm04	19434575	G	T	EFF=INTERGENIC(MODIFIER||||||||)
Gm04	20369981	C	T	EFF=INTERGENIC(MODIFIER||||||||)
Gm04	21077953	T	C	EFF=INTERGENIC(MODIFIER||||||||)
Gm04	21077972	G	A	EFF=INTERGENIC(MODIFIER||||||||)
Gm04	21077975	T	C	EFF=INTERGENIC(MODIFIER||||||||)
Gm04	21078997	C	T	EFF=INTERGENIC(MODIFIER||||||||)
Gm04	21229343	C	T	EFF=INTERGENIC(MODIFIER||||||||)
Gm04	21606221	C	T	EFF=INTERGENIC(MODIFIER||||||||)
Gm04	21607149	C	T	EFF=INTERGENIC(MODIFIER||||||||)
Gm04	21607611	C	T	EFF=INTERGENIC(MODIFIER||||||||)
Gm04	22410453	C	G	EFF=INTERGENIC(MODIFIER||||||||)
Gm04	22410465	C	A	EFF=INTERGENIC(MODIFIER||||||||)
Gm04	22463448	C	A	EFF=INTERGENIC(MODIFIER||||||||)
Gm04	23297036	G	A	EFF=INTERGENIC(MODIFIER||||||||)
Gm04	23327500	T	C	EFF=INTERGENIC(MODIFIER||||||||)
Gm04	23618715	A	G	EFF=INTERGENIC(MODIFIER||||||||)
Gm04	23797758	C	G	EFF=INTERGENIC(MODIFIER||||||||)
Gm04	23830263	C	T	EFF=INTERGENIC(MODIFIER||||||||)
Gm04	23830331	T	C	EFF=INTERGENIC(MODIFIER||||||||)
Gm04	23846122	A	G	EFF=INTERGENIC(MODIFIER||||||||)
Gm04	23846140	G	T	EFF=INTERGENIC(MODIFIER||||||||)
Gm04	23846234	G	A	EFF=INTERGENIC(MODIFIER||||||||)
Gm04	25352427	T	C	EFF=DOWNSTREAM(MODIFIER||||Glyma04g22130|mRNA||PAC:16256225|),STOP_LOST(HIGH|MISSENSE|Taa/Caa|*130Q|Glyma04g22110|mRNA||PAC:16256223|PAC:16256223.exon.1),UPSTREAM(MODIFIER||||Glyma04g22120|mRNA||PAC:16256224|)
Gm04	25352594	T	C	EFF=DOWNSTREAM(MODIFIER||||Glyma04g22110|mRNA||PAC:16256223|),DOWNSTREAM(MODIFIER||||Glyma04g22130|mRNA||PAC:16256225|),SYNONYMOUS_CODING(LOW|SILENT|taT/taC|Y13|Glyma04g22120|mRNA||PAC:16256224|PAC:16256224.exon.1)
Gm04	26042273	G	A	EFF=INTERGENIC(MODIFIER||||||||)
Gm04	26122410	T	A	EFF=UPSTREAM(MODIFIER||||Glyma04g22800|mRNA||PAC:16256252|),UPSTREAM(MODIFIER||||Glyma04g22810|mRNA||PAC:16256253|)
Gm04	26151031	T	C	EFF=INTERGENIC(MODIFIER||||||||)
Gm04	26161907	C	T	EFF=INTERGENIC(MODIFIER||||||||)
Gm04	26161915	C	T	EFF=INTERGENIC(MODIFIER||||||||)
Gm04	27918955	T	C	EFF=DOWNSTREAM(MODIFIER||||Glyma04g24320|mRNA||PAC:16256288|)
Gm04	27918983	C	A	EFF=DOWNSTREAM(MODIFIER||||Glyma04g24320|mRNA||PAC:16256288|)
Gm04	27918999	T	A	EFF=DOWNSTREAM(MODIFIER||||Glyma04g24320|mRNA||PAC:16256288|)
Gm04	27919585	T	C	EFF=DOWNSTREAM(MODIFIER||||Glyma04g24320|mRNA||PAC:16256288|)
Gm04	27919685	A	G	EFF=DOWNSTREAM(MODIFIER||||Glyma04g24320|mRNA||PAC:16256288|)
Gm04	27919710	A	C	EFF=DOWNSTREAM(MODIFIER||||Glyma04g24320|mRNA||PAC:16256288|)
Gm04	27919809	T	C	EFF=DOWNSTREAM(MODIFIER||||Glyma04g24320|mRNA||PAC:16256288|)
Gm04	27945998	C	T	EFF=INTRON(MODIFIER||||Glyma04g24350|mRNA||PAC:16256289|)
Gm04	28486873	A	T	EFF=INTERGENIC(MODIFIER||||||||)
Gm04	28591601	G	T	EFF=DOWNSTREAM(MODIFIER||||Glyma04g24910|mRNA||PAC:16256309|),UPSTREAM(MODIFIER||||Glyma04g24920|mRNA||PAC:16256310|)
Gm04	28972514	T	A	EFF=INTERGENIC(MODIFIER||||||||)
Gm04	29656495	G	A	EFF=INTERGENIC(MODIFIER||||||||)
Gm04	29726419	G	T	EFF=INTERGENIC(MODIFIER||||||||)
Gm04	29770675	G	A	EFF=INTERGENIC(MODIFIER||||||||)
Gm04	29770676	C	T	EFF=INTERGENIC(MODIFIER||||||||)
Gm04	29770677	G	A	EFF=INTERGENIC(MODIFIER||||||||)
Gm04	29944110	A	G	EFF=INTERGENIC(MODIFIER||||||||)
Gm04	29944147	G	A	EFF=INTERGENIC(MODIFIER||||||||)
Gm04	29944262	A	G	EFF=INTERGENIC(MODIFIER||||||||)
Gm04	29944274	A	G	EFF=INTERGENIC(MODIFIER||||||||)
Gm04	30162308	T	C	EFF=INTERGENIC(MODIFIER||||||||)
Gm04	30162310	G	A	EFF=INTERGENIC(MODIFIER||||||||)
Gm04	30185137	C	T	EFF=INTERGENIC(MODIFIER||||||||)
Gm04	30248716	C	G	EFF=UTR_3_PRIME(MODIFIER||||Glyma04g26230|mRNA||PAC:16256327|PAC:16256327.exon.12)
Gm04	30370292	C	T	EFF=INTERGENIC(MODIFIER||||||||)
Gm04	30386836	G	T	EFF=INTERGENIC(MODIFIER||||||||)
Gm04	30414992	G	A	EFF=INTERGENIC(MODIFIER||||||||)
Gm04	30516594	A	G	EFF=INTERGENIC(MODIFIER||||||||)
Gm04	30541598	C	T	EFF=INTERGENIC(MODIFIER||||||||)
Gm04	30550949	A	G	EFF=INTERGENIC(MODIFIER||||||||)
Gm04	30578490	T	G	EFF=SYNONYMOUS_CODING(LOW|SILENT|tcA/tcC|S219|Glyma04g26700|mRNA||PAC:16256336|PAC:16256336.exon.6)
Gm04	30578517	A	G	EFF=SYNONYMOUS_CODING(LOW|SILENT|gcT/gcC|A210|Glyma04g26700|mRNA||PAC:16256336|PAC:16256336.exon.6)
Gm04	30578559	G	A	EFF=SYNONYMOUS_CODING(LOW|SILENT|taC/taT|Y196|Glyma04g26700|mRNA||PAC:16256336|PAC:16256336.exon.6)
Gm04	30725916	C	A	EFF=DOWNSTREAM(MODIFIER||||Glyma04g26780|mRNA||PAC:16256344|),DOWNSTREAM(MODIFIER||||Glyma04g26800|mRNA||PAC:16256347|),NON_SYNONYMOUS_CODING(MODERATE|MISSENSE|gGt/gTt|G351V|Glyma04g26800|mRNA||PAC:16256348|PAC:16256348.exon.5)
Gm04	30730480	A	G	EFF=NON_SYNONYMOUS_CODING(MODERATE|MISSENSE|gTa/gCa|V1231A|Glyma04g26800|mRNA||PAC:16256347|PAC:16256347.exon.14),NON_SYNONYMOUS_CODING(MODERATE|MISSENSE|gTa/gCa|V186A|Glyma04g26800|mRNA||PAC:16256348|PAC:16256348.exon.3)
Gm04	30737750	A	C	EFF=INTRON(MODIFIER||||Glyma04g26800|mRNA||PAC:16256347|)
Gm04	30737759	G	A	EFF=INTRON(MODIFIER||||Glyma04g26800|mRNA||PAC:16256347|)
Gm04	30774523	A	G	EFF=INTERGENIC(MODIFIER||||||||)
Gm04	30934147	G	A	EFF=INTERGENIC(MODIFIER||||||||)
Gm04	31277992	T	G	EFF=INTERGENIC(MODIFIER||||||||)
Gm04	31320988	C	A	EFF=INTERGENIC(MODIFIER||||||||)
Gm04	32016349	T	C	EFF=INTERGENIC(MODIFIER||||||||)
Gm04	32023866	T	C	EFF=INTERGENIC(MODIFIER||||||||)
Gm04	32023878	A	G	EFF=INTERGENIC(MODIFIER||||||||)
Gm04	32043696	C	T	EFF=INTERGENIC(MODIFIER||||||||)
Gm04	32121158	G	T	EFF=INTERGENIC(MODIFIER||||||||)
Gm04	32121182	T	C	EFF=INTERGENIC(MODIFIER||||||||)
Gm04	32181016	C	A	EFF=INTERGENIC(MODIFIER||||||||)
Gm04	32252186	T	C	EFF=INTERGENIC(MODIFIER||||||||)
Gm04	32271162	A	G	EFF=INTERGENIC(MODIFIER||||||||)
Gm04	32271174	A	G	EFF=INTERGENIC(MODIFIER||||||||)
Gm04	32469499	C	A	EFF=INTERGENIC(MODIFIER||||||||)
Gm04	32469507	T	C	EFF=INTERGENIC(MODIFIER||||||||)
Gm04	33680630	A	T	EFF=INTERGENIC(MODIFIER||||||||)
Gm04	33680655	T	A	EFF=INTERGENIC(MODIFIER||||||||)
Gm04	33785879	A	G	EFF=SYNONYMOUS_CODING(LOW|SILENT|aaT/aaC|N146|Glyma04g29890|mRNA||PAC:16256427|PAC:16256427.exon.3),SYNONYMOUS_CODING(LOW|SILENT|aaT/aaC|N146|Glyma04g29890|mRNA||PAC:16256428|PAC:16256428.exon.3),SYNONYMOUS_CODING(LOW|SILENT|aaT/aaC|N146|Glyma04g29890|mRNA||PAC:16256429|PAC:16256429.exon.3)
Gm04	36849685	G	C	EFF=DOWNSTREAM(MODIFIER||||Glyma04g32330|mRNA||PAC:16256516|)
Gm04	36849692	C	A	EFF=DOWNSTREAM(MODIFIER||||Glyma04g32330|mRNA||PAC:16256516|)
Gm04	36916226	A	T	EFF=INTERGENIC(MODIFIER||||||||)
Gm04	36967744	A	G	EFF=INTERGENIC(MODIFIER||||||||)
Gm04	37221383	T	C	EFF=INTERGENIC(MODIFIER||||||||)
Gm04	37221408	TCCC	TCC	EFF=INTERGENIC(MODIFIER||||||||)
Gm04	38057164	G	A	EFF=INTERGENIC(MODIFIER||||||||)
Gm04	38149768	C	T	EFF=INTERGENIC(MODIFIER||||||||)
Gm04	38376326	T	A	EFF=INTRAGENIC(MODIFIER||||Glyma04g32990|mRNA|||)
Gm04	38377113	C	G	EFF=INTRAGENIC(MODIFIER||||Glyma04g32990|mRNA|||)
Gm04	38994611	A	G	EFF=INTERGENIC(MODIFIER||||||||)
Gm04	39104184	A	G	EFF=INTERGENIC(MODIFIER||||||||)
Gm04	39219034	A	G	EFF=NON_SYNONYMOUS_CODING(MODERATE|MISSENSE|Aca/Gca|T207A|Glyma04g33580|mRNA||PAC:16256644|PAC:16256644.exon.6),UTR_3_PRIME(MODIFIER||||Glyma04g33580|mRNA||PAC:16256645|PAC:16256645.exon.5)
Gm04	39219110	T	C	EFF=INTRON(MODIFIER||||Glyma04g33580|mRNA||PAC:16256644|),INTRON(MODIFIER||||Glyma04g33580|mRNA||PAC:16256645|)
Gm04	39994217	G	A	EFF=INTERGENIC(MODIFIER||||||||)
Gm04	41217274	A	G	EFF=DOWNSTREAM(MODIFIER||||Glyma04g34940|mRNA||PAC:16256792|)
Gm04	41466649	A	G	EFF=DOWNSTREAM(MODIFIER||||Glyma04g35120|mRNA||PAC:16256815|)
Gm04	41466703	ATTTTTTTTT	ATTTTTTTT	EFF=DOWNSTREAM(MODIFIER||||Glyma04g35120|mRNA||PAC:16256815|)
Gm04	41792970	G	A	EFF=INTERGENIC(MODIFIER||||||||)
Gm04	41793722	G	T	EFF=INTERGENIC(MODIFIER||||||||)
Gm04	41820970	A	G	EFF=INTERGENIC(MODIFIER||||||||)
Gm04	41861739	T	A	EFF=INTERGENIC(MODIFIER||||||||)
Gm04	42211125	A	C	EFF=INTRON(MODIFIER||||Glyma04g35730|mRNA||PAC:16256865|)
Gm04	42212956	A	G	EFF=INTRON(MODIFIER||||Glyma04g35730|mRNA||PAC:16256865|)
Gm04	42652743	A	AT	EFF=INTERGENIC(MODIFIER||||||||)
Gm04	42691438	T	A	EFF=NON_SYNONYMOUS_CODING(MODERATE|MISSENSE|Atg/Ttg|M1268L|Glyma04g36150|mRNA||PAC:16256907|PAC:16256907.exon.8)
Gm04	42691445	A	T	EFF=SYNONYMOUS_CODING(LOW|SILENT|ccT/ccA|P1265|Glyma04g36150|mRNA||PAC:16256907|PAC:16256907.exon.8)
Gm04	42729784	A	T	EFF=DOWNSTREAM(MODIFIER||||Glyma04g36180|mRNA||PAC:16256910|),DOWNSTREAM(MODIFIER||||Glyma04g36200|mRNA||PAC:16256912|),UTR_3_PRIME(MODIFIER||||Glyma04g36190|mRNA||PAC:16256911|PAC:16256911.exon.3)
Gm04	42898631	G	T	EFF=DOWNSTREAM(MODIFIER||||Glyma04g36360|mRNA||PAC:16256932|),INTRAGENIC(MODIFIER||||Glyma04g36350|mRNA|||)
Gm04	42898666	C	A	EFF=DOWNSTREAM(MODIFIER||||Glyma04g36360|mRNA||PAC:16256932|),INTRAGENIC(MODIFIER||||Glyma04g36350|mRNA|||)
Gm04	43013921	C	T	EFF=UPSTREAM(MODIFIER||||Glyma04g36500|mRNA||PAC:16256948|)
Gm04	43135829	A	T	EFF=NON_SYNONYMOUS_CODING(MODERATE|MISSENSE|caA/caT|Q1258H|Glyma04g36620|mRNA||PAC:16256960|PAC:16256960.exon.11)
Gm04	43143748	T	A	EFF=NON_SYNONYMOUS_CODING(MODERATE|MISSENSE|Agg/Tgg|R1037W|Glyma04g36630|mRNA||PAC:16256961|PAC:16256961.exon.11)
Gm04	43207624	C	T	EFF=INTRON(MODIFIER||||Glyma04g36710|mRNA||PAC:16256969|)
Gm04	43240678	T	G	EFF=INTRON(MODIFIER||||Glyma04g36720|mRNA||PAC:16256970|)
Gm04	43247558	G	C	EFF=INTERGENIC(MODIFIER||||||||)
Gm04	43317673	A	T	EFF=SYNONYMOUS_CODING(LOW|SILENT|acA/acT|T619|Glyma04g36800|mRNA||PAC:16256976|PAC:16256976.exon.13),UPSTREAM(MODIFIER||||Glyma04g36810|mRNA||PAC:16256977|)
Gm04	43361876	T	G	EFF=UPSTREAM(MODIFIER||||Glyma04g36870|mRNA||PAC:16256984|),UPSTREAM(MODIFIER||||Glyma04g36870|mRNA||PAC:16256985|),UTR_3_PRIME(MODIFIER||||Glyma04g36860|mRNA||PAC:16256982|PAC:16256982.exon.12),UTR_3_PRIME(MODIFIER||||Glyma04g36860|mRNA||PAC:16256983|PAC:16256983.exon.11)
Gm04	43395671	G	C	EFF=DOWNSTREAM(MODIFIER||||Glyma04g36900|mRNA||PAC:16256988|),SYNONYMOUS_CODING(LOW|SILENT|gtC/gtG|V145|Glyma04g36910|mRNA||PAC:16256989|PAC:16256989.exon.1)
Gm04	43414941	T	C	EFF=NON_SYNONYMOUS_CODING(MODERATE|MISSENSE|Acg/Gcg|T129A|Glyma04g36920|mRNA||PAC:16256990|PAC:16256990.exon.1)
Gm04	43414946	A	C	EFF=NON_SYNONYMOUS_CODING(MODERATE|MISSENSE|gTg/gGg|V127G|Glyma04g36920|mRNA||PAC:16256990|PAC:16256990.exon.1)
Gm04	43414970	T	G	EFF=NON_SYNONYMOUS_CODING(MODERATE|MISSENSE|cAg/cCg|Q119P|Glyma04g36920|mRNA||PAC:16256990|PAC:16256990.exon.1)
Gm04	43415081	A	G	EFF=NON_SYNONYMOUS_CODING(MODERATE|MISSENSE|aTc/aCc|I82T|Glyma04g36920|mRNA||PAC:16256990|PAC:16256990.exon.1)
Gm04	43440684	A	G	EFF=DOWNSTREAM(MODIFIER||||Glyma04g36950|mRNA||PAC:16256993|),DOWNSTREAM(MODIFIER||||Glyma04g36950|mRNA||PAC:16256995|),INTRON(MODIFIER||||Glyma04g36950|mRNA||PAC:16256994|),UPSTREAM(MODIFIER||||Glyma04g36940|mRNA||PAC:16256992|)
Gm04	43445054	A	G	EFF=UTR_3_PRIME(MODIFIER||||Glyma04g36950|mRNA||PAC:16256993|PAC:16256993.exon.6),UTR_3_PRIME(MODIFIER||||Glyma04g36950|mRNA||PAC:16256994|PAC:16256994.exon.6),UTR_3_PRIME(MODIFIER||||Glyma04g36950|mRNA||PAC:16256995|PAC:16256995.exon.6)
Gm04	43501433	A	G	EFF=SYNONYMOUS_CODING(LOW|SILENT|gcA/gcG|A519|Glyma04g37020|mRNA||PAC:16257004|PAC:16257004.exon.15)
Gm04	43510004	A	G	EFF=INTRON(MODIFIER||||Glyma04g37030|mRNA||PAC:16257005|),INTRON(MODIFIER||||Glyma04g37030|mRNA||PAC:16257006|),INTRON(MODIFIER||||Glyma04g37030|mRNA||PAC:16257007|)
Gm04	43510183	T	C	EFF=INTRON(MODIFIER||||Glyma04g37030|mRNA||PAC:16257005|),INTRON(MODIFIER||||Glyma04g37030|mRNA||PAC:16257006|),INTRON(MODIFIER||||Glyma04g37030|mRNA||PAC:16257007|)
Gm04	43510190	C	A	EFF=INTRON(MODIFIER||||Glyma04g37030|mRNA||PAC:16257005|),INTRON(MODIFIER||||Glyma04g37030|mRNA||PAC:16257006|),INTRON(MODIFIER||||Glyma04g37030|mRNA||PAC:16257007|)
Gm04	43559102	G	A	EFF=UTR_5_PRIME(MODIFIER||||Glyma04g37120|mRNA||PAC:16257011|PAC:16257011.exon.2),UTR_5_PRIME(MODIFIER||||Glyma04g37120|mRNA||PAC:16257012|PAC:16257012.exon.2)
Gm04	43559242	A	C	EFF=INTRON(MODIFIER||||Glyma04g37120|mRNA||PAC:16257011|),INTRON(MODIFIER||||Glyma04g37120|mRNA||PAC:16257012|)
Gm04	43559281	A	G	EFF=INTRON(MODIFIER||||Glyma04g37120|mRNA||PAC:16257011|),INTRON(MODIFIER||||Glyma04g37120|mRNA||PAC:16257012|)
Gm04	43559836	T	G	EFF=INTRON(MODIFIER||||Glyma04g37120|mRNA||PAC:16257011|),INTRON(MODIFIER||||Glyma04g37120|mRNA||PAC:16257012|),UPSTREAM(MODIFIER||||Glyma04g37130|mRNA||PAC:16257013|)
Gm04	43565101	G	A	EFF=DOWNSTREAM(MODIFIER||||Glyma04g37120|mRNA||PAC:16257011|),DOWNSTREAM(MODIFIER||||Glyma04g37120|mRNA||PAC:16257012|),SYNONYMOUS_CODING(LOW|SILENT|gcG/gcA|A24|Glyma04g37130|mRNA||PAC:16257013|PAC:16257013.exon.1)
Gm04	43565116	C	T	EFF=DOWNSTREAM(MODIFIER||||Glyma04g37120|mRNA||PAC:16257011|),DOWNSTREAM(MODIFIER||||Glyma04g37120|mRNA||PAC:16257012|),SYNONYMOUS_CODING(LOW|SILENT|tcC/tcT|S29|Glyma04g37130|mRNA||PAC:16257013|PAC:16257013.exon.1)
Gm04	43576954	G	A	EFF=DOWNSTREAM(MODIFIER||||Glyma04g37150|mRNA||PAC:16257015|),SYNONYMOUS_CODING(LOW|SILENT|caG/caA|Q160|Glyma04g37140|mRNA||PAC:16257014|PAC:16257014.exon.3),UPSTREAM(MODIFIER||||Glyma04g37160|mRNA||PAC:16257016|)
Gm04	43577077	C	T	EFF=DOWNSTREAM(MODIFIER||||Glyma04g37150|mRNA||PAC:16257015|),INTRON(MODIFIER||||Glyma04g37140|mRNA||PAC:16257014|),UPSTREAM(MODIFIER||||Glyma04g37160|mRNA||PAC:16257016|)
Gm04	43678971	G	C	EFF=DOWNSTREAM(MODIFIER||||Glyma04g37320|mRNA||PAC:16257032|)
Gm04	43696800	A	T	EFF=DOWNSTREAM(MODIFIER||||Glyma04g37360|mRNA||PAC:16257036|),UPSTREAM(MODIFIER||||Glyma04g37330|mRNA||PAC:16257033|)
Gm04	43777780	C	T	EFF=INTERGENIC(MODIFIER||||||||)
Gm04	43777837	T	C	EFF=INTERGENIC(MODIFIER||||||||)
Gm04	43777851	C	A	EFF=INTERGENIC(MODIFIER||||||||)
Gm04	43859839	T	A	EFF=DOWNSTREAM(MODIFIER||||Glyma04g37460|mRNA||PAC:16257050|),SYNONYMOUS_CODING(LOW|SILENT|tcT/tcA|S48|Glyma04g37470|mRNA||PAC:16257051|PAC:16257051.exon.1)
Gm04	44054109	TC	T	EFF=UPSTREAM(MODIFIER||||Glyma04g37670|mRNA||PAC:16257075|)
Gm04	44242945	A	C	EFF=SYNONYMOUS_CODING(LOW|SILENT|gcT/gcG|A407|Glyma04g37790|mRNA||PAC:16257089|PAC:16257089.exon.11)
Gm04	44257535	T	G	EFF=INTERGENIC(MODIFIER||||||||)
Gm04	44337272	A	G	EFF=DOWNSTREAM(MODIFIER||||Glyma04g37870|mRNA||PAC:16257099|)
Gm04	44337286	C	T	EFF=DOWNSTREAM(MODIFIER||||Glyma04g37870|mRNA||PAC:16257099|)
Gm04	44337295	G	A	EFF=DOWNSTREAM(MODIFIER||||Glyma04g37870|mRNA||PAC:16257099|)
Gm04	44379743	A	G	EFF=DOWNSTREAM(MODIFIER||||Glyma04g37930|mRNA||PAC:16257105|),SYNONYMOUS_CODING(LOW|SILENT|ccA/ccG|P260|Glyma04g37920|mRNA||PAC:16257104|PAC:16257104.exon.4)
Gm04	44388528	A	T	EFF=DOWNSTREAM(MODIFIER||||Glyma04g37940|mRNA||PAC:16257106|),DOWNSTREAM(MODIFIER||||Glyma04g37960|mRNA||PAC:16257108|),INTRON(MODIFIER||||Glyma04g37950|mRNA||PAC:16257107|),UPSTREAM(MODIFIER||||Glyma04g37930|mRNA||PAC:16257105|)
Gm04	44394056	A	T	EFF=DOWNSTREAM(MODIFIER||||Glyma04g37970|mRNA||PAC:16257109|),DOWNSTREAM(MODIFIER||||Glyma04g37970|mRNA||PAC:16257110|),DOWNSTREAM(MODIFIER||||Glyma04g37970|mRNA||PAC:16257111|),UPSTREAM(MODIFIER||||Glyma04g37950|mRNA||PAC:16257107|),UPSTREAM(MODIFIER||||Glyma04g37960|mRNA||PAC:16257108|)
Gm04	44428278	G	C	EFF=SYNONYMOUS_CODING(LOW|SILENT|gcC/gcG|A914|Glyma04g38010|mRNA||PAC:16257116|PAC:16257116.exon.16)
Gm04	44428335	G	T	EFF=SYNONYMOUS_CODING(LOW|SILENT|tcC/tcA|S895|Glyma04g38010|mRNA||PAC:16257116|PAC:16257116.exon.16)
Gm04	44431782	G	A	EFF=SYNONYMOUS_CODING(LOW|SILENT|aaC/aaT|N244|Glyma04g38010|mRNA||PAC:16257116|PAC:16257116.exon.7)
Gm04	44503782	G	A	EFF=NON_SYNONYMOUS_CODING(MODERATE|MISSENSE|Gtg/Atg|V459M|Glyma04g38100|mRNA||PAC:16257125|PAC:16257125.exon.3)
Gm04	44682008	C	T	EFF=DOWNSTREAM(MODIFIER||||Glyma04g38280|mRNA||PAC:16257146|),SYNONYMOUS_CODING(LOW|SILENT|gaC/gaT|D177|Glyma04g38270|mRNA||PAC:16257145|PAC:16257145.exon.6)
Gm04	44715740	C	T	EFF=INTRON(MODIFIER||||Glyma04g38320|mRNA||PAC:16257150|),INTRON(MODIFIER||||Glyma04g38320|mRNA||PAC:16257151|)
Gm04	44891076	T	C	EFF=DOWNSTREAM(MODIFIER||||Glyma04g38500|mRNA||PAC:16257169|)
Gm04	44891123	C	T	EFF=DOWNSTREAM(MODIFIER||||Glyma04g38500|mRNA||PAC:16257169|)
Gm04	45121077	TGG	TG	EFF=INTRON(MODIFIER||||Glyma04g38800|mRNA||PAC:16257201|)
Gm04	45121090	A	G	EFF=INTRON(MODIFIER||||Glyma04g38800|mRNA||PAC:16257201|)
Gm04	45121099	G	C	EFF=INTRON(MODIFIER||||Glyma04g38800|mRNA||PAC:16257201|)
Gm04	45192927	C	T	EFF=SYNONYMOUS_CODING(LOW|SILENT|ccG/ccA|P551|Glyma04g38870|mRNA||PAC:16257211|PAC:16257211.exon.8)
Gm04	45208892	T	C	EFF=INTERGENIC(MODIFIER||||||||)
Gm04	45208904	C	T	EFF=INTERGENIC(MODIFIER||||||||)
Gm04	45293099	G	A	EFF=INTRON(MODIFIER||||Glyma04g39030|mRNA||PAC:16257226|)
Gm04	45298499	C	G	EFF=INTRON(MODIFIER||||Glyma04g39030|mRNA||PAC:16257226|)
Gm04	45410893	G	A	EFF=INTRON(MODIFIER||||Glyma04g39170|mRNA||PAC:16257240|)
Gm04	45410961	G	A	EFF=INTRON(MODIFIER||||Glyma04g39170|mRNA||PAC:16257240|)
Gm04	45424105	G	C	EFF=SYNONYMOUS_CODING(LOW|SILENT|ccG/ccC|P499|Glyma04g39180|mRNA||PAC:16257241|PAC:16257241.exon.10)
Gm04	45424162	G	T	EFF=INTRON(MODIFIER||||Glyma04g39180|mRNA||PAC:16257241|)
Gm04	45580672	G	C	EFF=NON_SYNONYMOUS_CODING(MODERATE|MISSENSE|tGc/tCc|C35S|Glyma04g39370|mRNA||PAC:16257265|PAC:16257265.exon.1),NON_SYNONYMOUS_CODING(MODERATE|MISSENSE|tGc/tCc|C35S|Glyma04g39370|mRNA||PAC:16257266|PAC:16257266.exon.1),NON_SYNONYMOUS_CODING(MODERATE|MISSENSE|tGc/tCc|C35S|Glyma04g39370|mRNA||PAC:16257267|PAC:16257267.exon.1),NON_SYNONYMOUS_CODING(MODERATE|MISSENSE|tGc/tCc|C35S|Glyma04g39370|mRNA||P…
Gm04	45597533	GAAAAAAAAAAAAA	GAAAAAAAAAA	EFF=INTRON(MODIFIER||||Glyma04g39390|mRNA||PAC:16257272|)
Gm04	45597626	T	A	EFF=NON_SYNONYMOUS_CODING(MODERATE|MISSENSE|Act/Tct|T21S|Glyma04g39390|mRNA||PAC:16257272|PAC:16257272.exon.1)
Gm04	45973610	C	A	EFF=UPSTREAM(MODIFIER||||Glyma04g39820|mRNA||PAC:16257323|)
Gm04	45973638	T	A	EFF=UPSTREAM(MODIFIER||||Glyma04g39820|mRNA||PAC:16257323|)
Gm04	46080947	C	T	EFF=DOWNSTREAM(MODIFIER||||Glyma04g39920|mRNA||PAC:16257334|),DOWNSTREAM(MODIFIER||||Glyma04g39920|mRNA||PAC:16257335|),DOWNSTREAM(MODIFIER||||Glyma04g39920|mRNA||PAC:16257336|),DOWNSTREAM(MODIFIER||||Glyma04g39920|mRNA||PAC:16257337|),SYNONYMOUS_CODING(LOW|SILENT|ggC/ggT|G58|Glyma04g39930|mRNA||PAC:16257338|PAC:16257338.exon.1),SYNONYMOUS_CODING(LOW|SILENT|ggC/ggT|G58|Glyma04g39930|mRNA||PAC:162…
Gm04	46084228	G	T	EFF=DOWNSTREAM(MODIFIER||||Glyma04g39930|mRNA||PAC:16257339|),UPSTREAM(MODIFIER||||Glyma04g39940|mRNA||PAC:16257340|),UTR_3_PRIME(MODIFIER||||Glyma04g39930|mRNA||PAC:16257338|PAC:16257338.exon.6)
Gm04	46183401	G	C	EFF=DOWNSTREAM(MODIFIER||||Glyma04g40060|mRNA||PAC:16257352|),SYNONYMOUS_CODING(LOW|SILENT|ctC/ctG|L177|Glyma04g40040|mRNA||PAC:16257350|PAC:16257350.exon.3),SYNONYMOUS_CODING(LOW|SILENT|gcG/gcC|A41|Glyma04g40050|mRNA||PAC:16257351|PAC:16257351.exon.1)
Gm04	46186482	T	C	EFF=DOWNSTREAM(MODIFIER||||Glyma04g40050|mRNA||PAC:16257351|),UPSTREAM(MODIFIER||||Glyma04g40040|mRNA||PAC:16257350|),UTR_3_PRIME(MODIFIER||||Glyma04g40060|mRNA||PAC:16257352|PAC:16257352.exon.8)
Gm04	46227350	CATTATTA	CATTA	EFF=DOWNSTREAM(MODIFIER||||Glyma04g40090|mRNA||PAC:16257355|)
Gm04	46287395	C	T	EFF=DOWNSTREAM(MODIFIER||||Glyma04g40150|mRNA||PAC:16257362|)
Gm04	46309741	G	A	EFF=DOWNSTREAM(MODIFIER||||Glyma04g40170|mRNA||PAC:16257364|),DOWNSTREAM(MODIFIER||||Glyma04g40170|mRNA||PAC:16257366|),NON_SYNONYMOUS_CODING(MODERATE|MISSENSE|gCc/gTc|A513V|Glyma04g40180|mRNA||PAC:16257367|PAC:16257367.exon.2)
Gm04	46328342	A	G	EFF=NON_SYNONYMOUS_CODING(MODERATE|MISSENSE|aAa/aGa|K35R|Glyma04g40210|mRNA||PAC:16257370|PAC:16257370.exon.2),UPSTREAM(MODIFIER||||Glyma04g40200|mRNA||PAC:16257369|),UPSTREAM(MODIFIER||||Glyma04g40210|mRNA||PAC:16257371|)
Gm04	46328400	T	A	EFF=NON_SYNONYMOUS_CODING(MODERATE|MISSENSE|caT/caA|H54Q|Glyma04g40210|mRNA||PAC:16257370|PAC:16257370.exon.2),UPSTREAM(MODIFIER||||Glyma04g40200|mRNA||PAC:16257369|),UPSTREAM(MODIFIER||||Glyma04g40210|mRNA||PAC:16257371|)
Gm04	46390533	T	C	EFF=SYNONYMOUS_CODING(LOW|SILENT|atT/atC|I7|Glyma04g40290|mRNA||PAC:16257379|PAC:16257379.exon.1),UPSTREAM(MODIFIER||||Glyma04g40280|mRNA||PAC:16257378|)
Gm04	46391969	C	T	EFF=INTRON(MODIFIER||||Glyma04g40290|mRNA||PAC:16257379|)
Gm04	46411426	C	T	EFF=INTRON(MODIFIER||||Glyma04g40310|mRNA||PAC:16257381|)
Gm04	46417686	T	A	EFF=NON_SYNONYMOUS_CODING(MODERATE|MISSENSE|Agc/Tgc|S19C|Glyma04g40310|mRNA||PAC:16257381|PAC:16257381.exon.1),UPSTREAM(MODIFIER||||Glyma04g40320|mRNA||PAC:16257382|)
Gm04	46419778	T	C	EFF=UPSTREAM(MODIFIER||||Glyma04g40310|mRNA||PAC:16257381|),UPSTREAM(MODIFIER||||Glyma04g40320|mRNA||PAC:16257382|)
Gm04	46451692	T	C	EFF=DOWNSTREAM(MODIFIER||||Glyma04g40370|mRNA||PAC:16257386|),DOWNSTREAM(MODIFIER||||Glyma04g40370|mRNA||PAC:16257387|),DOWNSTREAM(MODIFIER||||Glyma04g40390|mRNA||PAC:16257389|),NON_SYNONYMOUS_CODING(MODERATE|MISSENSE|aAc/aGc|N41S|Glyma04g40380|mRNA||PAC:16257388|PAC:16257388.exon.1)
Gm04	46473322	A	G	EFF=UPSTREAM(MODIFIER||||Glyma04g40420|mRNA||PAC:16257393|)
Gm04	46496115	G	A	EFF=SYNONYMOUS_CODING(LOW|SILENT|gaC/gaT|D379|Glyma04g40450|mRNA||PAC:16257397|PAC:16257397.exon.5),UPSTREAM(MODIFIER||||Glyma04g40440|mRNA||PAC:16257396|)
Gm04	46496130	T	C	EFF=SYNONYMOUS_CODING(LOW|SILENT|gcA/gcG|A374|Glyma04g40450|mRNA||PAC:16257397|PAC:16257397.exon.5),UPSTREAM(MODIFIER||||Glyma04g40440|mRNA||PAC:16257396|)
Gm04	46785978	T	A	EFF=DOWNSTREAM(MODIFIER||||Glyma04g40880|mRNA||PAC:16257450|),SYNONYMOUS_CODING(LOW|SILENT|gtT/gtA|V961|Glyma04g40870|mRNA||PAC:16257449|PAC:16257449.exon.2)
Gm04	46857521	C	T	EFF=INTERGENIC(MODIFIER||||||||)
Gm04	46857567	C	T	EFF=INTERGENIC(MODIFIER||||||||)
Gm04	46896109	T	C	EFF=UTR_3_PRIME(MODIFIER||||Glyma04g41000|mRNA||PAC:16257463|PAC:16257463.exon.5)
Gm04	46896212	G	A	EFF=UTR_3_PRIME(MODIFIER||||Glyma04g41000|mRNA||PAC:16257463|PAC:16257463.exon.5)
Gm04	46896227	T	C	EFF=UTR_3_PRIME(MODIFIER||||Glyma04g41000|mRNA||PAC:16257463|PAC:16257463.exon.5)
Gm04	46896308	T	G	EFF=UTR_3_PRIME(MODIFIER||||Glyma04g41000|mRNA||PAC:16257463|PAC:16257463.exon.5)
Gm04	46943908	C	T	EFF=DOWNSTREAM(MODIFIER||||Glyma04g41070|mRNA||PAC:16257474|),INTRON(MODIFIER||||Glyma04g41070|mRNA||PAC:16257473|),INTRON(MODIFIER||||Glyma04g41080|mRNA||PAC:16257475|)
Gm04	46943935	C	T	EFF=DOWNSTREAM(MODIFIER||||Glyma04g41070|mRNA||PAC:16257474|),INTRON(MODIFIER||||Glyma04g41070|mRNA||PAC:16257473|),INTRON(MODIFIER||||Glyma04g41080|mRNA||PAC:16257475|)
Gm04	47030321	T	C	EFF=DOWNSTREAM(MODIFIER||||Glyma04g41170|mRNA||PAC:16257488|),DOWNSTREAM(MODIFIER||||Glyma04g41170|mRNA||PAC:16257489|),DOWNSTREAM(MODIFIER||||Glyma04g41170|mRNA||PAC:16257490|)
Gm04	47128551	C	T	EFF=DOWNSTREAM(MODIFIER||||Glyma04g41240|mRNA||PAC:16257498|),DOWNSTREAM(MODIFIER||||Glyma04g41260|mRNA||PAC:16257500|),DOWNSTREAM(MODIFIER||||Glyma04g41260|mRNA||PAC:16257501|),INTRON(MODIFIER||||Glyma04g41250|mRNA||PAC:16257499|)
Gm04	47139330	C	T	EFF=UPSTREAM(MODIFIER||||Glyma04g41260|mRNA||PAC:16257500|),UPSTREAM(MODIFIER||||Glyma04g41260|mRNA||PAC:16257501|),UPSTREAM(MODIFIER||||Glyma04g41270|mRNA||PAC:16257502|),UPSTREAM(MODIFIER||||Glyma04g41270|mRNA||PAC:16257503|)
Gm04	47139773	G	C	EFF=SYNONYMOUS_CODING(LOW|SILENT|gtG/gtC|V96|Glyma04g41270|mRNA||PAC:16257502|PAC:16257502.exon.1),SYNONYMOUS_CODING(LOW|SILENT|gtG/gtC|V96|Glyma04g41270|mRNA||PAC:16257503|PAC:16257503.exon.1),UPSTREAM(MODIFIER||||Glyma04g41260|mRNA||PAC:16257500|),UPSTREAM(MODIFIER||||Glyma04g41260|mRNA||PAC:16257501|)
Gm04	47212471	T	C	EFF=SYNONYMOUS_CODING(LOW|SILENT|caA/caG|Q610|Glyma04g41370|mRNA||PAC:16257513|PAC:16257513.exon.18),UPSTREAM(MODIFIER||||Glyma04g41360|mRNA||PAC:16257512|)
Gm04	47217793	GTTT	GTTTT	EFF=DOWNSTREAM(MODIFIER||||Glyma04g41380|mRNA||PAC:16257514|),INTRON(MODIFIER||||Glyma04g41370|mRNA||PAC:16257513|)
Gm04	47271464	T	G	EFF=INTRAGENIC(MODIFIER||||Glyma04g41430|mRNA|||)
Gm04	47282405	A	G	EFF=INTRON(MODIFIER||||Glyma04g41440|mRNA||PAC:16257523|),INTRON(MODIFIER||||Glyma04g41440|mRNA||PAC:16257524|)
Gm04	47282418	A	C	EFF=INTRON(MODIFIER||||Glyma04g41440|mRNA||PAC:16257523|),INTRON(MODIFIER||||Glyma04g41440|mRNA||PAC:16257524|)
Gm04	47282455	T	G	EFF=INTRON(MODIFIER||||Glyma04g41440|mRNA||PAC:16257523|),INTRON(MODIFIER||||Glyma04g41440|mRNA||PAC:16257524|)
Gm04	47547390	CAAAA	CAAA	EFF=INTRON(MODIFIER||||Glyma04g41690|mRNA||PAC:16257556|)
Gm04	47626208	G	A	EFF=DOWNSTREAM(MODIFIER||||Glyma04g41770|mRNA||PAC:16257565|),NON_SYNONYMOUS_CODING(MODERATE|MISSENSE|Gct/Act|A137T|Glyma04g41760|mRNA||PAC:16257564|PAC:16257564.exon.2)
Gm04	47627080	C	A	EFF=DOWNSTREAM(MODIFIER||||Glyma04g41770|mRNA||PAC:16257565|),INTRON(MODIFIER||||Glyma04g41760|mRNA||PAC:16257564|)
Gm04	47629177	T	C	EFF=DOWNSTREAM(MODIFIER||||Glyma04g41760|mRNA||PAC:16257564|),NON_SYNONYMOUS_CODING(MODERATE|MISSENSE|aAc/aGc|N528S|Glyma04g41770|mRNA||PAC:16257565|PAC:16257565.exon.2)
Gm04	47630328	G	C	EFF=DOWNSTREAM(MODIFIER||||Glyma04g41760|mRNA||PAC:16257564|),SYNONYMOUS_CODING(LOW|SILENT|gtC/gtG|V267|Glyma04g41770|mRNA||PAC:16257565|PAC:16257565.exon.1)
Gm04	47630391	T	C	EFF=DOWNSTREAM(MODIFIER||||Glyma04g41760|mRNA||PAC:16257564|),SYNONYMOUS_CODING(LOW|SILENT|tcA/tcG|S246|Glyma04g41770|mRNA||PAC:16257565|PAC:16257565.exon.1)
Gm04	47667370	T	C	EFF=SYNONYMOUS_CODING(LOW|SILENT|ggT/ggC|G11|Glyma04g41830|mRNA||PAC:16257571|PAC:16257571.exon.1)
Gm04	47761305	C	T	EFF=DOWNSTREAM(MODIFIER||||Glyma04g41970|mRNA||PAC:16257585|)
Gm04	47863635	A	T	EFF=DOWNSTREAM(MODIFIER||||Glyma04g42080|mRNA||PAC:16257596|),SYNONYMOUS_CODING(LOW|SILENT|gtA/gtT|V636|Glyma04g42070|mRNA||PAC:16257595|PAC:16257595.exon.10)
Gm04	47953778	G	A	EFF=SYNONYMOUS_CODING(LOW|SILENT|atC/atT|I168|Glyma04g42170|mRNA||PAC:16257606|PAC:16257606.exon.5)
Gm04	48008107	A	T	EFF=UPSTREAM(MODIFIER||||Glyma04g42230|mRNA||PAC:16257614|),UPSTREAM(MODIFIER||||Glyma04g42240|mRNA||PAC:16257615|)
Gm04	48039497	T	C	EFF=DOWNSTREAM(MODIFIER||||Glyma04g42280|mRNA||PAC:16257619|),SYNONYMOUS_CODING(LOW|SILENT|caT/caC|H587|Glyma04g42270|mRNA||PAC:16257618|PAC:16257618.exon.6)
Gm04	48139532	G	A	EFF=DOWNSTREAM(MODIFIER||||Glyma04g42390|mRNA||PAC:16257630|),UPSTREAM(MODIFIER||||Glyma04g42380|mRNA||PAC:16257629|)
Gm04	48315968	G	C	EFF=UTR_5_PRIME(MODIFIER||||Glyma04g42620|mRNA||PAC:16257659|PAC:16257659.exon.1)
Gm04	48335456	G	T	EFF=SYNONYMOUS_CODING(LOW|SILENT|tcC/tcA|S64|Glyma04g42640|mRNA||PAC:16257661|PAC:16257661.exon.3)
Gm04	48359010	T	A	EFF=DOWNSTREAM(MODIFIER||||Glyma04g42660|mRNA||PAC:16257663|),INTRON(MODIFIER||||Glyma04g42670|mRNA||PAC:16257664|)
Gm04	48620408	G	T	EFF=INTERGENIC(MODIFIER||||||||)
Gm04	48620435	G	A	EFF=INTERGENIC(MODIFIER||||||||)
Gm04	48741200	A	C	EFF=NON_SYNONYMOUS_CODING(MODERATE|MISSENSE|aTg/aGg|M48R|Glyma04g43110|mRNA||PAC:16257721|PAC:16257721.exon.2)
Gm04	48782120	A	G	EFF=NON_SYNONYMOUS_CODING(MODERATE|MISSENSE|Tca/Cca|S58P|Glyma04g43180|mRNA||PAC:16257730|PAC:16257730.exon.1)
[truncated: 8,122 more rows]
